# Supplementary material for: Nuclear receptor binding protein 1 regulates intestinal progenitor cell homeostasis and tumour formation
Source: PubMed Central journal article supplement — EMBO J. 2012 Apr 17;31(11):2486–97. doi: 10.1038/emboj.2012.91 (PMC3365428; doi:10.1038/emboj.2012.91), 2012-04-17
Supplement: emboj201291s1.pdf [file emboj201291s1.pdf]

## **Supplemental Figure Legend, Table legends and Methods**

**Supplemental Figure 1:** Multiple sequence alignment of *NRBP1* protein orthologs from human (NP\_037524), mouse (NP\_671734) and *C. elegans* (NP\_492022) are shown. Blue box: BC box sequence, green box: Cul5 binding site sequence.

**Supplemental Figure 2: A,** Table showing number of embryos (E) or live mice, number of litters and number reabsorbed embryos (R) from *Nrbp1*<sup>+/-</sup> intercrosses. **B,** *Nrbp1*<sup>-/-</sup> embryos at ~7.5 days post fertilisation appear small and developmentally delayed when compared to wild type (*Nrbp1*<sup>+/+</sup>) littermate embryos.

**Supplemental Figure 3: A,** *In situ* hybridisation and immunohistochemical analysis of serial sectioned wild type small intestine tissue using probes specific to *Olfm4*, *Lgr5* and anti-Chromogranin A (CA) (left panels), a probe specific to the conditionally deleted region of *Nrbp1* (shown in positive and negative colours; middle panels) and an overlay/merge of both images showing any co-localisations (right panel; black arrows indicate positive staining enteroendocrine cells). **B** Immunohistochemical analysis of enteroendocrine cells (anti-chromogranin A antibody; CA) in C (control; *Nrbp1*<sup>flox</sup> *Rosa*<sup>CreERT2/+</sup>) and cKO (*Nrbp1*<sup>flox</sup> *Rosa*<sup>CreERT2/+</sup>) mice at 4-5 post tamoxifen treatment (x20 magnification; images 4-5 days). **C & D,** cKO mice had more mitotic cells and unchanged apoptotic cells than C intestines at 4-5 days post dosing. Data are represented as mean ± SD; \* *P*<0.05.

**Supplemental Figure 4: A**, *In situ* analysis (left panel) of small intestines from C and cKO mice at 7-9 days post tamoxifen treatment indicating loss of *Nrbp1* causes an increase in *Hes1* expression (x20 magnification). **B**, Quantitative RT-PCR analysis of the *Notch* genes, *Notch1*, *Notch2*, *Notch3* and *Notch4* in the intestine of C and cKO mice at 4-5 days post tamoxifen treatment. \*  $P < 0.05$ , \*\*  $P < 0.01$ .

**Supplemental Figure 5: Analysis of the gene express following somatic deletion of *Nrbp1***. Venn diagrams showing the overlap of the 500 most downregulated or upregulated genes in intestinal tissue between *Nrbp1<sup>flox</sup>* C *Rosa<sup>CreERT2/+</sup>* and *Nrbp1<sup>flox</sup>* *Rosa<sup>CreERT2/+</sup>* mice at 4-5 days post tamoxifen treatment as established by microarray analysis and either the top 88 down-regulated and the top 139 up-regulated genes following *Apc* loss at day 4 or the top 405 down-regulated and the top 93 up-regulated genes following *Apc* loss at day 5 , (Sansom et al. 2004) and corresponding *P* values, computed by the Molecular signatures database MSigDB version 2.5 (<http://www.broadinstitute.org/gsea/msigdb/index.jsp>).

**Supplemental Figure 6:** *In vitro* analysis of crypts in culture from C and cKO mice. Crypts were treated with Adenoviral cre for 3-4 hours and re-plated in Matrigel, pictures were taken on crypts 1, 3, 6 and 9 days post viral infection. Cre infection was performed on 3 separate occasions with two cKO mice. Adeno-GFP infection was also performed alongside to investigate viral infection efficiency.

**Supplemental Figure 7:** *In situ* analysis of small intestines from C and cKO mice at 7-9 days post tamoxifen treatment showing localisation patterns of *Tsc22d1*, *Tsc22d2* and *Tsc22d4* (x20 magnification).

**Supplemental Table 1.** Microarray expression profiling results ( $P < 0.01$  to 2dp) comparing small intestinal epithelial cells from *Nrbp1<sup>flox/flox</sup> Rosa<sup>CreERT2/+</sup>* mice and *Nrbp1<sup>flox/flox</sup> Rosa<sup>CreERT2/+</sup>* mice 4-5 days post tamoxifen treatment. Data displayed as gene name, log fold change (logFC), average expression (AveExpr) and P value (adj.P.Val).

**Supplemental Table 2.** List of proteins identified with MASCOT search from Nrbp1 protein and Phactr2 control protein purification. Each purification was done twice and table shows; gene name, accession, number of peptides above homology for each repeated sample and description.

**Supplemental Table 3.** List of 715 bacterial clones used in RNAi screen targeting all known kinases from the Ahringer library (Kamath et al. 2003).

## Supplemental Methods

### *Mouse shRNA sequences (Sigma)*

shRNA1 (TRCN0000026689)

CCGGCCATCTAACACTTCTGCTGAACTCGAGTTCAGCAGAAGTGTTAGAT  
GGTTTTT

shRNA2 (TRCN0000026706)

CCGGGACTCATTACAGAGGGAGTTTCTCGAGAACTCCCTCTGTAATGA  
GTCTTTTT

shRNA3 (TRCN0000026749)

CCGGCAAAGGTAGAATCCTCATCTTCTCGAGAAGATGAGGATTCTACCTT  
TGTTTTT

shRNA4 (TRCN0000026730)

CCGGCAGCGTAATGTACCAGGCATTCTCGAGAATGCCTGGTACATTACG  
CTGTTTTT

### *Human shRNA sequences (Origene)*

shRNA1 (TI201442) ACAATCATGTGAAGACTTGTC

shRNA2 (TI201443) GCCCTCGCTCAAACCTCCTTGC

shRNA3 (TI201444) GAGAATATCCCCGAGTTGGCG

shRNA4 (TI201446) TTAGTGAGGCTGACCAGAGCC

shRNA5 (TI201447) ACAGTACCCTCAACTCAGCCG

shRNA6 (TI201448) GGTGGCCCTGGGGGGCCATTC

### *Antibodies*

Immunohistochemistry primary antibodies: anti-Ki67 (DCS - Innovative Diagnostik-Systeme: SP6), anti-chromogranin A (Abcam: ab15160), anti-lysozyme (Millipore: A0099), Anti-Ctnnb1 (Cell Signaling Technology: 9587), anti-c-Myc (A14) (Santa Cruz biotechnology, inc: sc-789), anti-Sox9 (Millipore: AB5535) and anti-phospho-Thr202/Tyr204 p44/42 Erk1/2 MAPK (Cell Signalling Technology: 20G11), anti-Sall4 (Sigma: HPA015791), anti-cleaved-caspase 3 antibody (Cell Signalling Technology: 9961). Western blot primary antibodies: anti-NRBP1 (Abnova: H00029959-D01P) and anti  $\beta$ -ACTIN (C11), anti-c-MYC (A-14) (Santa Cruz biotechnology), anti-phospho-Thr202/Tyr204 p44/42 ERK1/2 MAPK (Cell Signalling Technology), anti-Sall4 (Abcam: Ab29112 and Sigma: HPA015791), anti-Elongin C (Abcam) and anti-Flag (Sigma: F1804).

*Riboprobe primers*

|                |                                            |
|----------------|--------------------------------------------|
| <i>Lgr5</i>    | GGGATTGTTTCGATGGTGAAG                      |
|                | TAATACGACTCACTATAGGGAGCTCCTGCTCTAAGGCACCAC |
| <i>Mmp7</i>    | GGCATTCCAGAATTGTCACC                       |
|                | TAATACGACTCACTATAGGGAGGCACAAGGAAGAGGGAAACA |
| <i>Nrbp1</i>   | AATGAAAAGGCTTGGAAACG                       |
|                | TAATACGACTCACTATAGGGAGAGTAGCTGGATGGCACTGCT |
| <i>Olfm4</i>   | ATGTGAGGCCTCCAAAAGTG                       |
|                | TAATACGACTCACTATAGGGAGCTCATCCACAGCAAGGTCAA |
| <i>Hes1</i>    | AAAGATAGCTCCCGGCATTC                       |
|                | TAATACGACTCACTATAGGGAGTGGAAGGTGACACTGCGTTA |
| <i>Tsc22d1</i> | GTCAGCAGCCTTCTGTTTCC                       |

|                |                                            |
|----------------|--------------------------------------------|
|                | TAATACGACTCACTATAGGGAGGCAATGACCAATTGTTGTGG |
| <i>Tsc22d2</i> | CGGAAGAGACGCTCAACAAT                       |
|                | TAATACGACTCACTATAGGGAGGCTAGCGCTGGTAGACAAGG |
| <i>Tsc22d4</i> | AGCTGGCTAGTTTGGGCATA                       |
|                | TAATACGACTCACTATAGGGAGGCAAACATGAGGTGGGACTT |

*qRT-PCR primers*

| Gene          | Forward: 5' to 3'     | Reverse: 5' to 3'       | Concentration (nM) |
|---------------|-----------------------|-------------------------|--------------------|
| <i>Actb</i>   | GACGATATCGCTGCGCTGGT  | CCACGATGGAGGGGAATA      | 125                |
| <i>Ccnd1</i>  | CAGAAGTGCGAAGAGGAGGTC | TCATCTTAGAGGCCACGAACAT  | 125                |
| <i>CD44</i>   | CTCCTGGCACTGGCTCTGA   | CTGCCACACCTTCTCCTACTATT | 250                |
| <i>Gapdh</i>  | AGGTCGGTGTGAACGGATTTG | TGTAGACCATGTAGTTGAGGTCA | 250                |
| <i>Myc</i>    | TGAAGGCTGGATTTCCCTTG  | AGGGCTGTACGGAGTCGTAG    | 125                |
| <i>Notch1</i> | CCCTTGCTCTGCCTAACGC   | GGAGTCCTGGCATCGTTGG     | 500                |
| <i>Notch2</i> | CCTGAACGGGCAGTACATTTG | CACAGTGGAAGGCACCATCT    | 500                |
| <i>Notch3</i> | TGCCAGAGTTCAGTGGTGG   | CACAGGCAAATCGGCCATC     | 125                |
| <i>Notch4</i> | CTCTTGCCACTCAATTTCCCT | TTGCAGAGTTGGGTATCCCTG   | 125                |

Kamath RS, Fraser AG, Dong Y, Poulin G, Durbin R, Gotta M, Kanapin A, Le Bot N, Moreno S, Sohrmann M et al. 2003. Systematic functional analysis of the *Caenorhabditis elegans* genome using RNAi. *Nature* **421**: 231-237.

Wilson\_SupplFig1

A

```
Human MSEGESQTVLSSGSDPKVESSSSAPGLTSVSPVPTSTTSAASPEEEEESEDESEILEESPCGRWQKRREEVNRNVPGIDSAYLAMDTTEGVEVWNEVQFSEKKNYKLQEEKVRVFDN
Mouse MSEGESQTVVSSGSDPKVESSSLAPGLTSVSPVPTSTTSAASPEEEEESEDESEILEESPCGRWQKRREEVNRNVPGIDSAYLAMDTTEGVEVWNEVQFSEKKNYKLQEEKVRVFDN
Worm -----MVSSGEE-----RTAAGKTPIGDDAAS-----DSDADGAEIILEESPDKRWSKRREQVKQRDVPGIDVAYLAMDNETGNEVWNEVQFSEKKNFRAQEEKINAVFDN

Human LIQLEHLNIVKFHKYWADIKENKARVIFITEYMSSGSLKQFLKTKKNHKTMEKAWKRWCTQILSALSYLHSCDPPPIIHGNLTCDTIFIQHNGLIKIGSVAPDTINNHVKTCEEQKNL
Mouse LIQLEHLNIVKFHKYWADVKENKARVIFITEYMSSGSLKQFLKTKKNHKTMEKAWKRWCTQILSALSYLHSCDPPPIIHGNLTCDTIFIQHNGLIKIGSVAPDTINNHVKTCEEQKNL
Worm LTQLVHTNLVKFHKYWTDSKSEKPRIIFITEYMSSGSMFAFLQRTRKAGSSLSIKAWKKWTTQILSALNYLHSSDPPPIIHGNLTCTVFIQQNGLIKIGCVAPDAINNHVKTCRENMRYM

Human HFFAPEYG--EVTNVTTAVDIYSFGMCALEMAVLE----IQNGESSYVPQEAISSAIQLLEDPLQREFIQKCLQSEPARRPTARELLFHPALFEVPSLKLLAAHCVGHQHM--IPENA
Mouse HFFAPEYG--EVTNVTTAVDIYSFGMCALEMAVLE----IQNGESSYVPQEAISSAIQLLEDPLQREFIQKCLQSEPARRPTARELLFHPALFEVPSLKLLAAHCVGHQHM--IPENA
Worm HYIAPEYEILDNTELTSAADIYSFGICSLAIAVIGGLSGCQNGSSEGPVTEVDIEKAIRSLEDPMQDQDFIRQCLRKDPAERPSARELLFHQILFEVPSLKLLSAHAIVDSKKYEDVSESA

Human LE-EITKNMDTSAVLAEIPAGPGREPVTLYSQSPAL--ELDKFLEDVRNGIYPLTAFGLPRFQQPQ-----QEEVTSVPPVPSVKTP-----
Mouse LE-EITKNMDTSAVLAEIPAGPGREPVTLYSQSPAL--ELDKFLEDVRNGIYPLTAFGLPRFQQPQ-----QEEVTSVPPVPSVKTP-----
Worm FRIKDNETIAATSKLEMA-----YQVAAFQVDLEKFLDDVRNGIYPLTAFGLPRFQQPQ-----PLAHQPSVTLTRAYSNTNPSTLITTDISAPSSTHPSANSTITAETSVNTSLPGQSSQPSGT

Human -----TPEPAE-----VETRKVVLQMOCNIESVEEGVKHHLTLLKLEDKLNRLHSCDLMPNESI
Mouse -----TPEPAE-----VETRKVVLQMOCNIESVEEGVKHHLTLLKLEDKLNRLHSCDLMPNESI
Worm TTNTNGPSSIGKSASPEAVDKKIGVTSSTESTSKVEEVNGANVTIGSSNGRDAGSPTPEEEGEPNGERDMRLNRRHILEINVHIENE-----MSIVLLEDQMRQLTTSINKGDNP

Human PELAAELVQLGFISEADQSRLTSLLEETLNKFNFNARNSTLNSAAVTVSS----- 100%
Mouse PDLAAELVQLGFISEADQSRLTSLLEETLNKFNFNARNSTLNTATVTVSS----- 99.6%
Worm ETLTENLITHGFMQLDSEGVKAIIVAFDIRAARIAEGVQEEENETSTRESNSEAPIENGTSSSITNSVKPIVDSVAPSSQTPTTTTSS 57.3%
```

Wilson\_SupplFig2

A

| Age   | <i>Nrbp1</i> <sup>+/+</sup> | <i>Nrbp1</i> <sup>+/-</sup> | <i>Nrbp1</i> <sup>-/-</sup> | Resorbed | No. litters | P-value |
|-------|-----------------------------|-----------------------------|-----------------------------|----------|-------------|---------|
| E7.5  | 9                           | 15                          | 8                           | 0        | 3           | 0.9110  |
| E8.5  | 7                           | 12                          | 0                           | 5        | 3           | 0.0001  |
| E9.5  | 8                           | 10                          | 0                           | 7        | 3           | 0.0001  |
| E10.5 | 5                           | 6                           | 0                           | 10       | 3           | 0.0001  |
| 3 wks | 14                          | 22                          | 0                           | N/A      | 10          | 0.0010  |

B

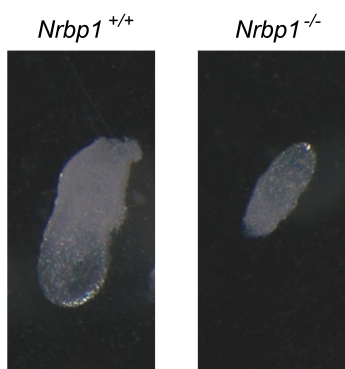



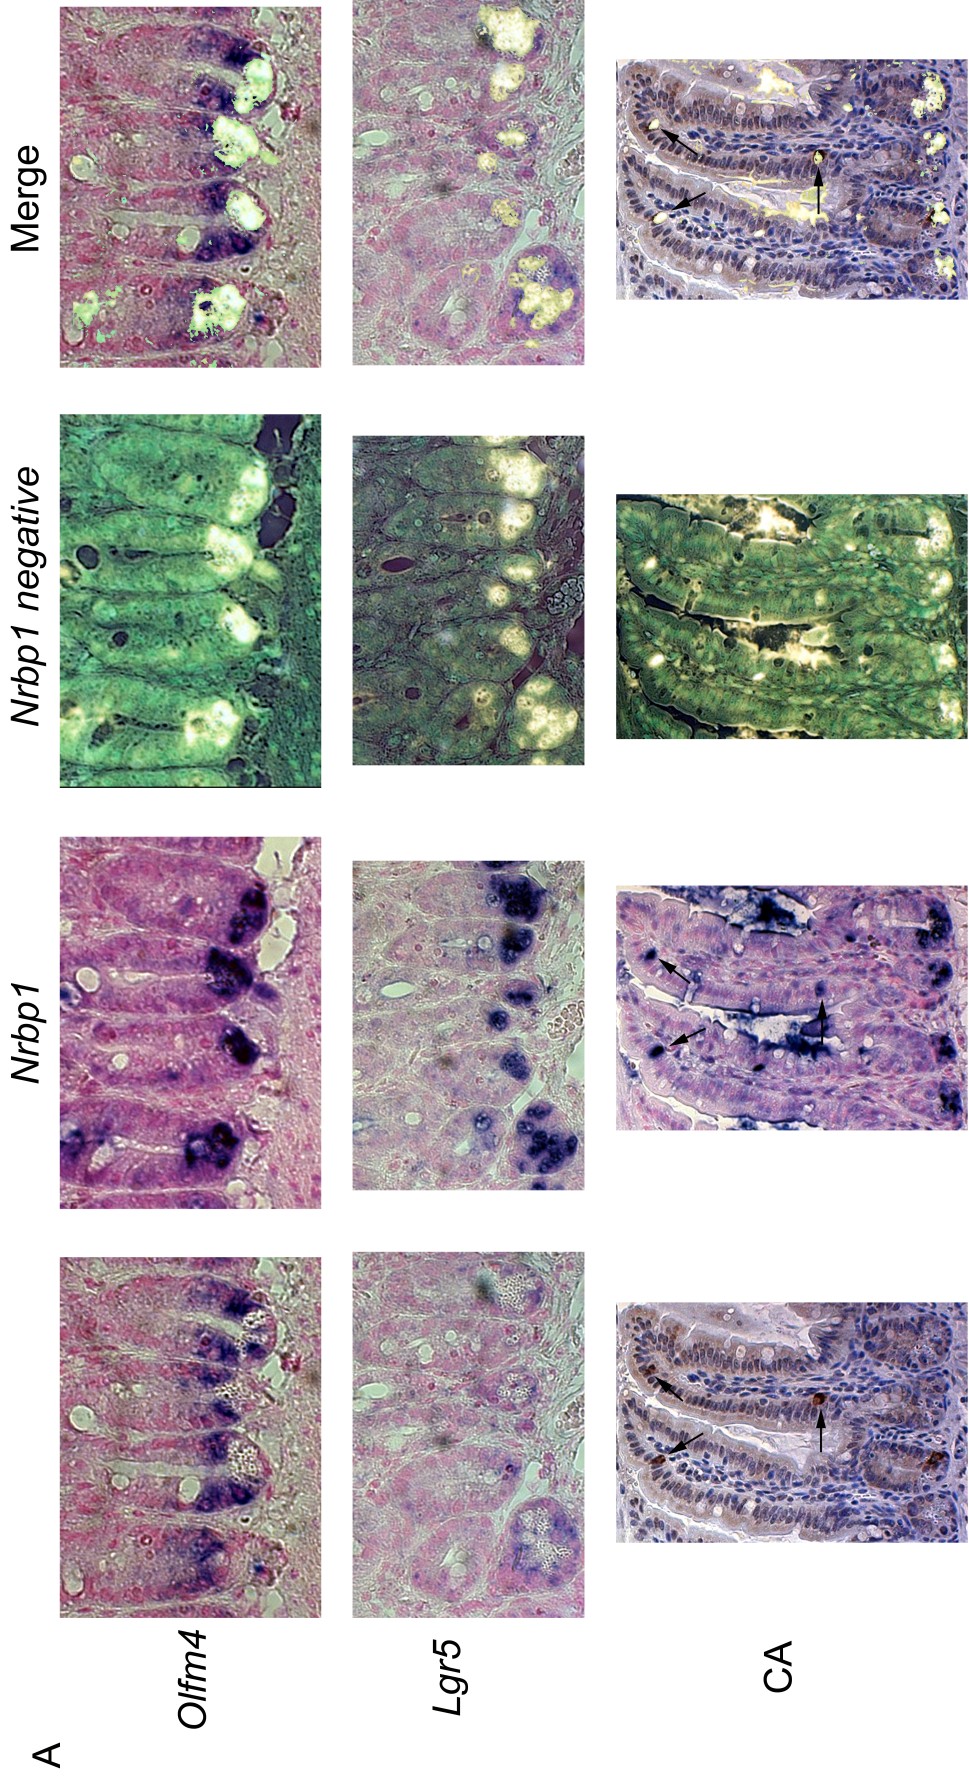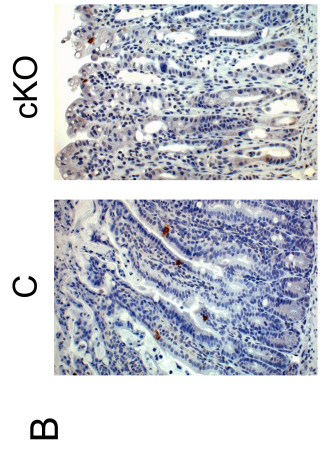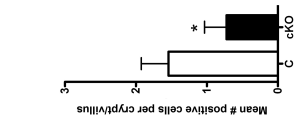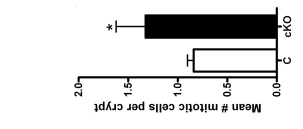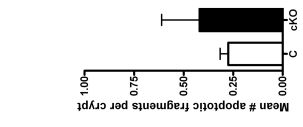

A

*Hes1*

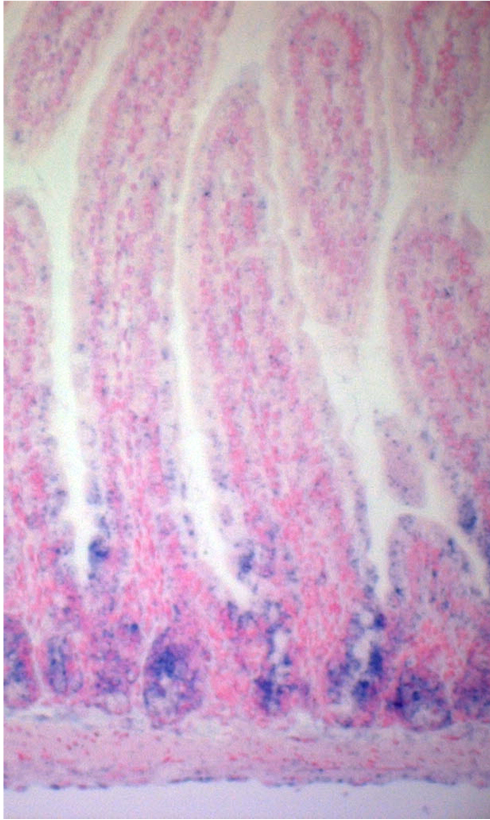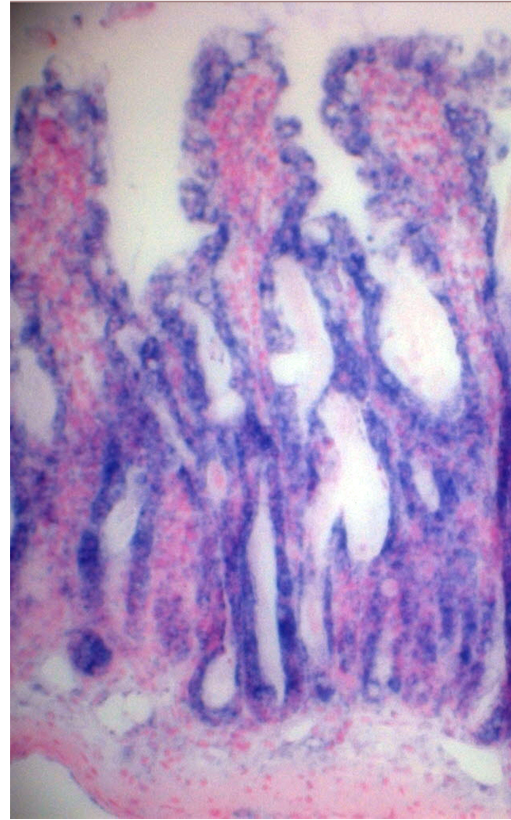

C

cKO

B

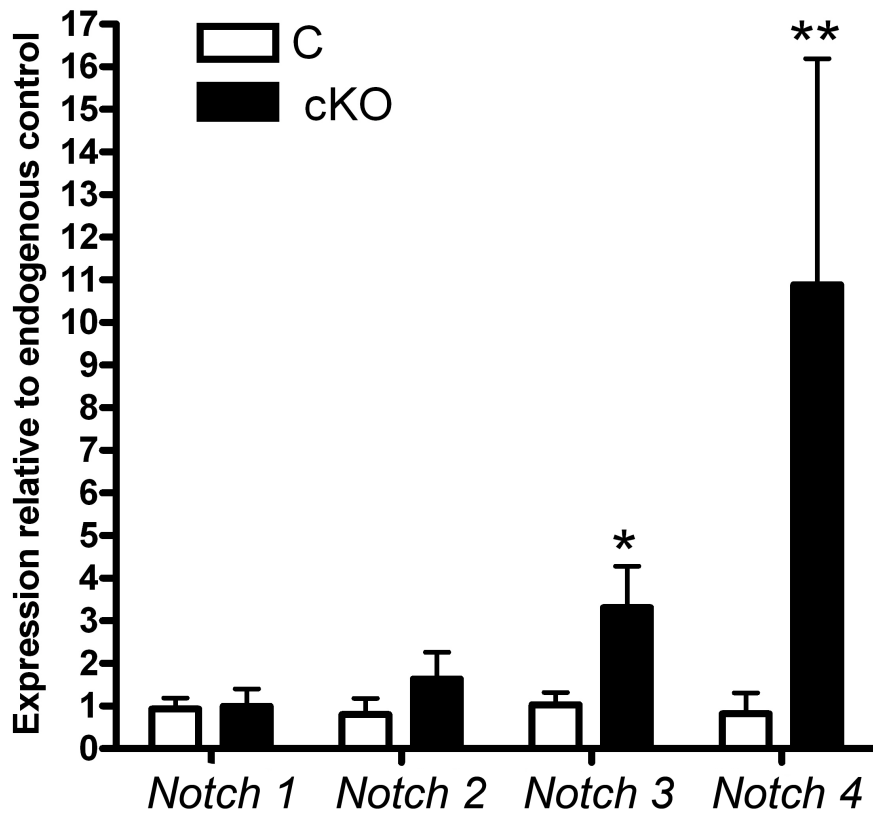

A

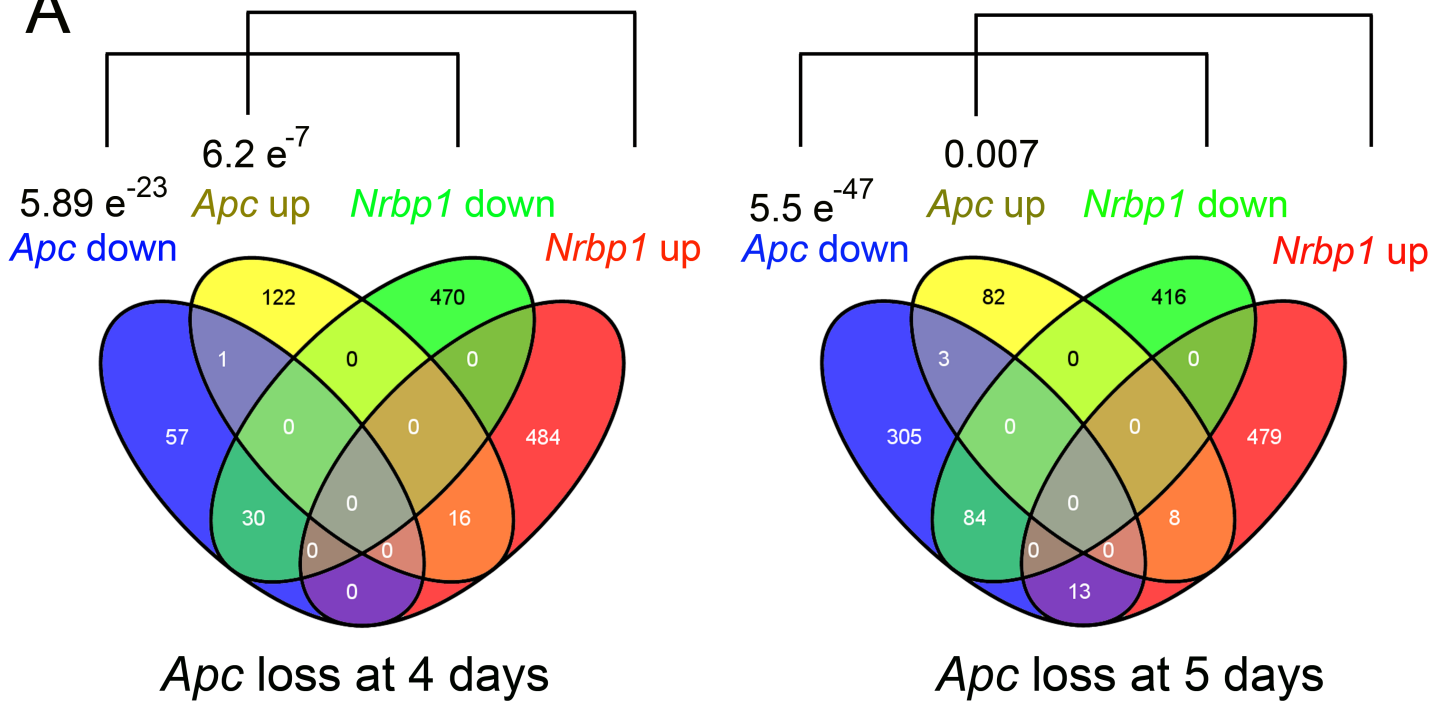

**A**

*Nrbp ko/+*

*Nrbp ko/c*

Day 1

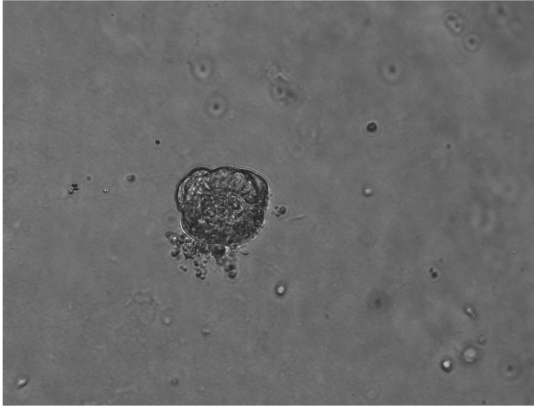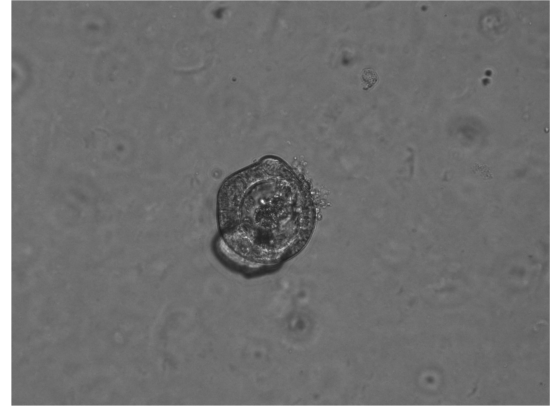

Day 3

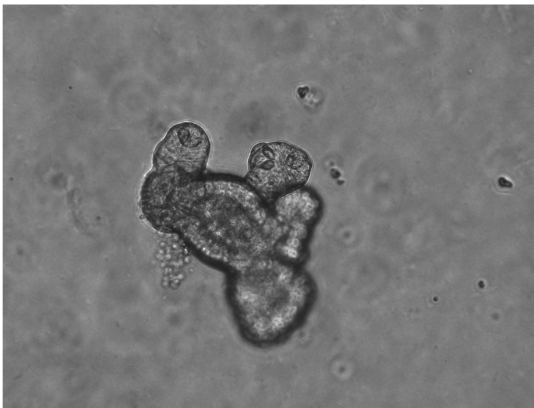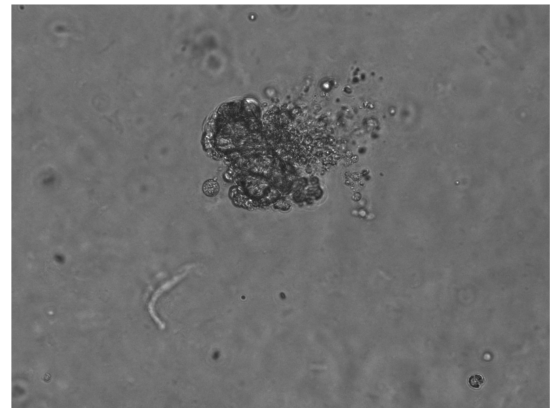

Day 6

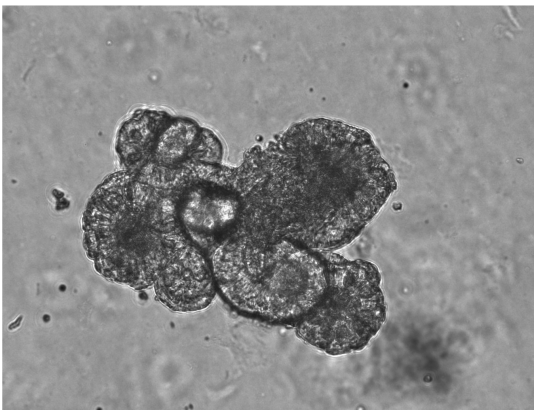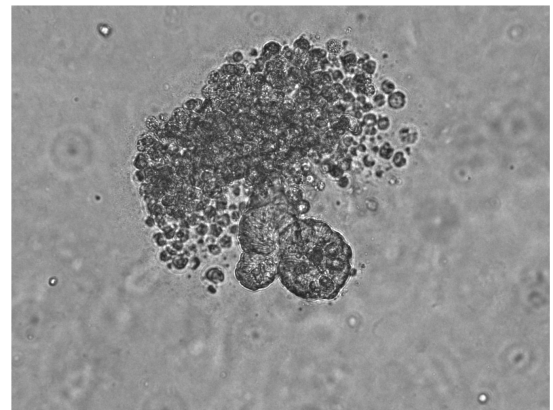

Day 9

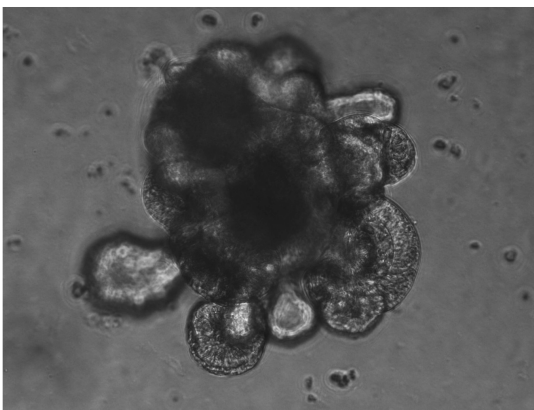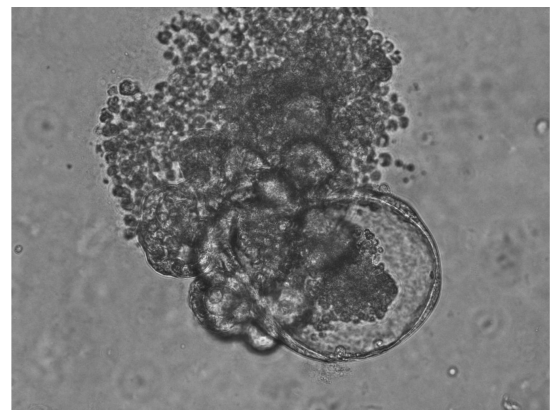

A

*Tsc22d1*

*Tsc22d2*

*Tsc22d4*

C

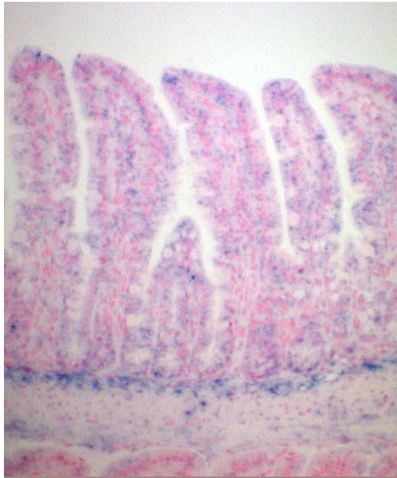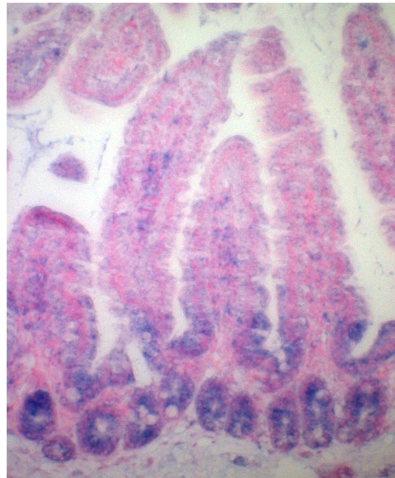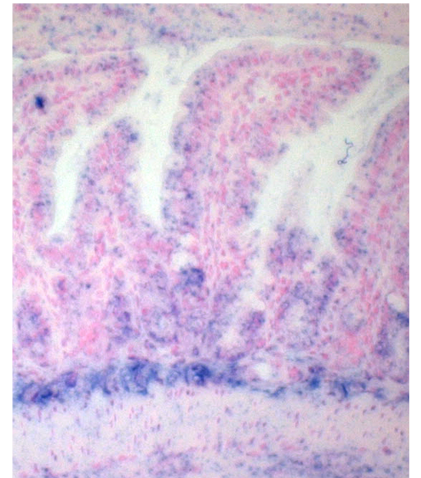

cKO

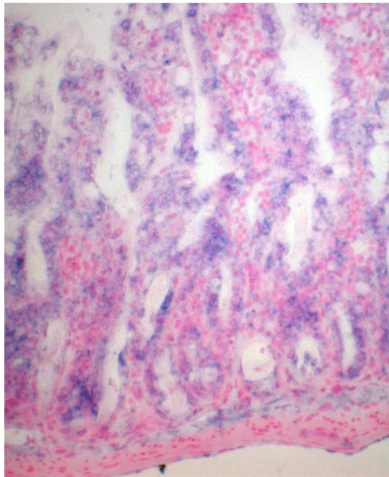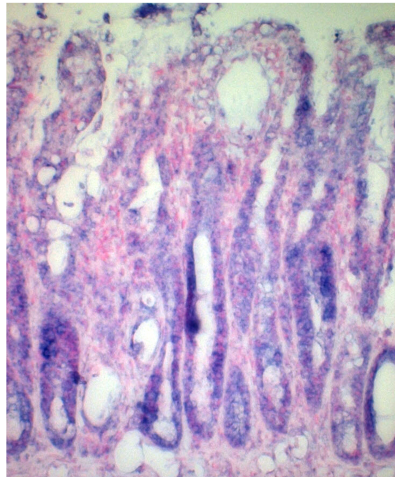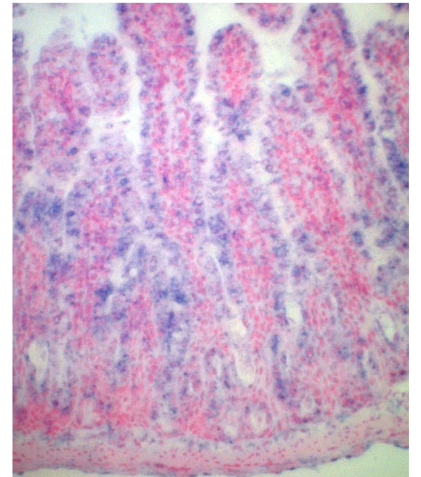

**Supplemental Table 1**

| <b>Gene ID</b> | <b>logFC</b> | <b>AveExpr</b> | <b>adj.P.Val</b> |
|----------------|--------------|----------------|------------------|
| LAMC2          | 1.323354786  | 8.010682506    | 1.61E-08         |
| CAPG           | 2.784937155  | 8.954766406    | 1.96E-08         |
| ABP1           | -5.733541699 | 11.90740087    | 3.30E-08         |
| AMN            | -3.284098637 | 11.34185566    | 4.19E-08         |
| ASAH2          | -3.695021699 | 10.94595842    | 4.40E-08         |
| PDZK1          | -4.210502506 | 11.0961101     | 4.94E-08         |
| PLAUR          | 1.750124321  | 8.409317175    | 7.31E-08         |
| SLC16A10       | -1.403435456 | 8.611332656    | 7.31E-08         |
| ACTN1          | 2.571845117  | 10.35010596    | 1.28E-07         |
| E130012A19RIK  | 2.162074749  | 8.228511223    | 1.28E-07         |
| LOC226413      | -4.809037343 | 10.89324467    | 1.57E-07         |
| LY6D           | 3.567149252  | 8.840171308    | 1.57E-07         |
| MID1IP1        | 1.69583901   | 8.91213485     | 1.57E-07         |
| POLD4          | 1.297777105  | 9.091618238    | 1.57E-07         |
| ABCG5          | -2.867946487 | 11.2959446     | 1.60E-07         |
| ANXA3          | 3.948260421  | 10.16359346    | 1.69E-07         |
| ILVBL          | -1.136303992 | 9.837206824    | 1.69E-07         |
| IQGAP2         | -1.685743182 | 10.99223399    | 1.69E-07         |
| CDS1           | -1.503546997 | 10.79818256    | 1.73E-07         |
| RBP1           | 2.429495814  | 8.908527369    | 1.80E-07         |
| ST3GAL6        | 1.414641468  | 10.5691054     | 2.10E-07         |
| SAMD5          | 1.028796082  | 7.888000154    | 2.82E-07         |
| IGFBP3         | 1.074571012  | 8.14465356     | 4.00E-07         |
| PDZD3          | -1.43417142  | 8.795895398    | 4.09E-07         |
| KHK            | -2.759343256 | 10.62159316    | 4.41E-07         |
| SLC2A1         | 2.973564881  | 10.06565049    | 4.41E-07         |
| 4933421H10RIK  | 1.244765347  | 8.185887373    | 4.87E-07         |
| LOC226685      | 0.767718999  | 7.875115392    | 4.87E-07         |
| ENC1           | 0.80895177   | 8.341659288    | 5.11E-07         |
| TNFAIP8        | 1.030610549  | 8.414027337    | 5.11E-07         |
| OSTA           | -2.208267385 | 12.77669109    | 5.12E-07         |
| QSOX1          | 0.771092549  | 8.050189805    | 5.12E-07         |
| NAGS           | -1.16590464  | 8.511828375    | 5.71E-07         |
| REEP6          | -2.020677027 | 9.882725795    | 5.82E-07         |
| ABCG8          | -2.571243291 | 10.02831572    | 7.65E-07         |
| SLC45A3        | 0.998904812  | 7.836317282    | 8.89E-07         |
| CCK            | 1.853087672  | 9.012632174    | 9.16E-07         |
| COX7A1         | -3.398350886 | 11.41784993    | 9.16E-07         |
| NAALADL1       | -3.084679528 | 10.19049145    | 9.16E-07         |
| SLC39A5        | -1.36238448  | 8.682452625    | 9.16E-07         |
| 2210404O07RIK  | -3.829157075 | 12.69531598    | 9.46E-07         |
| AP2A2          | -0.695363408 | 9.081080913    | 9.83E-07         |
| CARHSP1        | 0.952553012  | 9.386787859    | 9.83E-07         |
| CTSL           | 0.733143095  | 7.793707344    | 9.83E-07         |
| CYP4V3         | -4.273510796 | 11.5647446     | 9.83E-07         |
| DSCR1L2        | 1.375665588  | 9.072016234    | 9.83E-07         |
| TTYH2          | -0.74267226  | 8.511260633    | 9.83E-07         |
| ME2            | -2.283388223 | 9.523221237    | 1.08E-06         |
| DAB2           | 0.479001298  | 7.963942384    | 1.11E-06         |
| NAPRT1         | -2.219953221 | 10.48124559    | 1.11E-06         |
| MRC1           | 1.433543488  | 8.395876957    | 1.27E-06         |
| ERCC1          | 0.834547427  | 8.523484488    | 1.33E-06         |
| IL1R2          | 1.745272913  | 8.261047498    | 1.33E-06         |
| ZFYVE21        | -1.626121277 | 11.17126718    | 1.33E-06         |

|              |              |             |          |
|--------------|--------------|-------------|----------|
| MOGAT2       | -1.399925231 | 10.57311963 | 1.40E-06 |
| ARRB2        | 0.675038852  | 8.23143344  | 1.43E-06 |
| MARCKSL1     | 1.059933619  | 8.071517293 | 1.43E-06 |
| ARG2         | -3.793082664 | 10.17917768 | 1.44E-06 |
| SLC22A1      | -1.96459457  | 9.796690953 | 1.54E-06 |
| IL1RN        | 1.614773146  | 8.095399629 | 1.64E-06 |
| KRT7         | 2.402731093  | 10.03397773 | 1.72E-06 |
| SPRR1A       | 2.574692503  | 8.934815034 | 1.72E-06 |
| BC003236     | 0.525597474  | 7.965875481 | 1.79E-06 |
| FAM162A      | 2.902662151  | 10.7706551  | 1.93E-06 |
| FAM129B      | 1.711905364  | 9.535243483 | 2.06E-06 |
| LOC100046883 | 0.685049197  | 8.271699989 | 2.09E-06 |
| CHIC2        | 0.742968572  | 8.738734494 | 2.14E-06 |
| LOC100045457 | -0.500999252 | 7.96289648  | 2.14E-06 |
| COL18A1      | 2.18286596   | 8.982261527 | 2.17E-06 |
| SLC39A6      | 0.587096361  | 8.180668341 | 2.28E-06 |
| ETV4         | 0.81618752   | 7.973370017 | 2.32E-06 |
| LIMK1        | 0.50502153   | 7.855594858 | 2.33E-06 |
| ADAMTS4      | 2.223674185  | 8.585618303 | 2.36E-06 |
| CTTNBP2NL    | 0.742180628  | 8.146446517 | 2.36E-06 |
| ANXA5        | 2.07372511   | 9.387112261 | 2.40E-06 |
| FXYD3        | 1.62675175   | 8.79371015  | 2.40E-06 |
| MMP3         | 1.100585242  | 7.9302066   | 2.40E-06 |
| NEK3         | -0.982190673 | 9.075594143 | 2.40E-06 |
| THOP1        | 0.989476189  | 8.629218799 | 2.40E-06 |
| CYP4F14      | -2.730282969 | 13.3683725  | 2.46E-06 |
| MTAP1S       | 0.51841271   | 8.204084393 | 2.69E-06 |
| PLCB3        | -1.121276439 | 10.29297213 | 2.69E-06 |
| SGSM3        | 1.03391791   | 8.34988962  | 2.69E-06 |
| SECTM1B      | -3.88729502  | 10.26521368 | 2.73E-06 |
| ACBD4        | -1.64820042  | 10.43211765 | 2.74E-06 |
| TNK2         | 0.471104153  | 7.751043312 | 2.75E-06 |
| ECM1         | 1.792511661  | 8.864275428 | 2.76E-06 |
| MYO1A        | -1.613432886 | 10.78993177 | 2.76E-06 |
| RETNLB       | 3.139522064  | 8.403536766 | 2.76E-06 |
| AKR7A5       | -1.386802492 | 10.41301861 | 2.95E-06 |
| CYP3A25      | -2.22536309  | 9.009764964 | 2.95E-06 |
| ECH1         | -0.710081877 | 12.11293219 | 2.95E-06 |
| NR1H3        | -1.576801327 | 9.165350838 | 2.95E-06 |
| NUPR1        | 2.762606372  | 11.1056752  | 2.95E-06 |
| SNX10        | 1.379452367  | 8.688036609 | 2.95E-06 |
| ACY1         | -1.480974529 | 10.55114163 | 3.01E-06 |
| ANO1         | 0.396925937  | 7.795653914 | 3.01E-06 |
| HS3ST1       | 2.849931719  | 9.704500524 | 3.01E-06 |
| KRT23        | 4.415130949  | 11.05788322 | 3.01E-06 |
| PAPPA        | 0.896869862  | 7.909092422 | 3.01E-06 |
| SCRN2        | -0.832016762 | 8.361049896 | 3.09E-06 |
| ADAMTSL4     | 2.147939502  | 8.496482963 | 3.26E-06 |
| ABCC4        | 1.656330231  | 8.168048648 | 3.43E-06 |
| FMNL2        | 1.419888485  | 8.02864532  | 3.43E-06 |
| GPR171       | 1.088771058  | 8.21301813  | 3.49E-06 |
| KCNK1        | 1.711095061  | 9.833956048 | 3.49E-06 |
| SHF          | 0.540282762  | 7.980035613 | 3.49E-06 |
| SLC7A11      | 1.40000156   | 7.996452851 | 3.49E-06 |
| TMEM86B      | -1.802936902 | 8.761768563 | 3.49E-06 |
| TUBB2B       | 1.760609295  | 8.675182147 | 3.49E-06 |
| HDHD3        | -1.555407174 | 9.417456808 | 3.56E-06 |
| GPR89        | -1.230529836 | 9.139111262 | 3.60E-06 |

|               |              |             |          |
|---------------|--------------|-------------|----------|
| 2010204N08RIK | -3.209457567 | 11.69343263 | 3.68E-06 |
| S100A11       | 2.333501647  | 13.53707013 | 3.68E-06 |
| 3110049J23RIK | -3.205198918 | 10.58053526 | 3.69E-06 |
| 2010003K15RIK | -1.445928399 | 8.845181638 | 3.93E-06 |
| BMP8B         | 1.729378061  | 8.30926913  | 3.93E-06 |
| EG667410      | -0.953835374 | 8.351033443 | 3.93E-06 |
| PPARGC1A      | -1.061961256 | 8.80479283  | 3.93E-06 |
| SULT2B1       | -1.121184255 | 10.30941811 | 3.93E-06 |
| TLE6          | 0.795833654  | 8.097585963 | 3.93E-06 |
| YWHAG         | 0.79067443   | 9.154180746 | 3.93E-06 |
| SLC5A11       | -1.920451893 | 8.78262507  | 3.96E-06 |
| KRT18         | 2.219876136  | 11.7348309  | 4.08E-06 |
| ANK           | -1.16765486  | 8.955249626 | 4.09E-06 |
| CTGF          | 2.774779677  | 9.351854337 | 4.09E-06 |
| NALP6         | -3.120666997 | 10.00237425 | 4.40E-06 |
| CHDH          | -0.555088527 | 8.092376464 | 4.42E-06 |
| ERGIC3        | -0.689901832 | 10.15646693 | 4.42E-06 |
| ITFG3         | -1.14492817  | 10.24583516 | 4.42E-06 |
| HTRA3         | 0.368636937  | 7.868197954 | 4.46E-06 |
| HSD17B11      | -1.132492587 | 8.918081592 | 4.55E-06 |
| 6720469N11RIK | 0.565311182  | 8.043655471 | 4.60E-06 |
| DPEP1         | -2.428691392 | 9.966846515 | 4.60E-06 |
| EBPL          | -1.678863751 | 9.587695167 | 4.60E-06 |
| ERLIN1        | -1.282959814 | 8.997173614 | 4.60E-06 |
| GDF15         | 3.105163612  | 8.900358953 | 4.60E-06 |
| TMEM120A      | -1.338250371 | 12.25294373 | 4.60E-06 |
| AGPAT4        | 1.747169051  | 9.251525698 | 4.68E-06 |
| GCNT1         | 0.668533733  | 7.88676643  | 4.85E-06 |
| MPND          | -1.151890871 | 9.95455165  | 4.85E-06 |
| IGFBP4        | 1.762938859  | 9.117560191 | 4.92E-06 |
| IGSF9         | -2.16375577  | 9.469676735 | 4.97E-06 |
| MOCS2         | -1.041600024 | 11.03785447 | 4.99E-06 |
| BCDO2         | -2.278603713 | 9.950662809 | 5.06E-06 |
| FBP1          | -1.354808683 | 8.516679853 | 5.13E-06 |
| FMO4          | -1.000711971 | 8.355142461 | 5.13E-06 |
| 1810023F06RIK | -1.54069148  | 9.11387744  | 5.15E-06 |
| ABCD1         | -1.228807268 | 8.932846682 | 5.19E-06 |
| GNPDA1        | -1.386292589 | 8.8937286   | 5.25E-06 |
| PTPLA         | 1.003962614  | 8.833002828 | 5.25E-06 |
| 3110013H01RIK | -1.194443557 | 10.55028596 | 5.37E-06 |
| RETSAT        | -2.314990805 | 10.35078035 | 5.41E-06 |
| AKP2          | 0.826374301  | 7.862026622 | 5.43E-06 |
| CLTB          | 0.599851917  | 8.442910696 | 5.45E-06 |
| GOLGA1        | -0.872556835 | 9.146315933 | 5.64E-06 |
| BPNT1         | -0.987638282 | 9.03012869  | 5.71E-06 |
| CYP2D22       | -1.578219992 | 9.148994159 | 5.71E-06 |
| SOAT1         | 0.886194896  | 8.333751076 | 5.71E-06 |
| TUBAL3        | -2.043157496 | 10.71349871 | 5.71E-06 |
| DOLPP1        | -0.552760388 | 8.793825818 | 5.79E-06 |
| FXYD5         | 0.767981029  | 8.090071844 | 5.79E-06 |
| AI427122      | -1.631014484 | 11.48488665 | 5.80E-06 |
| BCMO1         | 0.389232628  | 7.624252029 | 5.80E-06 |
| GPRC5B        | 0.620912347  | 7.839559234 | 5.80E-06 |
| SEPP1         | -2.844457181 | 10.36757442 | 5.80E-06 |
| SLC46A3       | -2.277606791 | 10.80714915 | 5.80E-06 |
| IL11          | 0.333325981  | 7.708268505 | 5.81E-06 |
| RWDD2B        | -0.536520717 | 8.27171738  | 5.81E-06 |
| TNFRSF12A     | 2.082881406  | 9.037331211 | 5.81E-06 |



|               |              |             |          |
|---------------|--------------|-------------|----------|
| TNFAIP2       | 1.108561874  | 8.124033259 | 6.04E-06 |
| MLLT3         | 0.39767359   | 7.972112186 | 6.07E-06 |
| CSNK1E        | 0.689929192  | 8.527897586 | 6.08E-06 |
| SQRDL         | 1.068391875  | 8.561328086 | 6.28E-06 |
| DGAT1         | -2.190923231 | 10.79940959 | 6.38E-06 |
| COL4A1        | 2.096561635  | 9.456475279 | 6.44E-06 |
| SH3KBP1       | 0.827900785  | 7.937598562 | 6.45E-06 |
| GDPD2         | -0.580949038 | 7.998512308 | 6.75E-06 |
| SELP          | 0.639856851  | 7.830393423 | 6.75E-06 |
| VDR           | -2.137902591 | 10.15784069 | 6.78E-06 |
| ATP5G3        | -0.739342547 | 14.41943167 | 6.95E-06 |
| GLRX          | -1.243896769 | 13.50036485 | 6.95E-06 |
| STK39         | 0.923996099  | 8.304518842 | 6.95E-06 |
| VLDLR         | 1.292424466  | 8.136340334 | 6.96E-06 |
| CBR3          | 0.944829864  | 7.98377792  | 7.07E-06 |
| NR5A2         | -0.826833859 | 8.175669477 | 7.07E-06 |
| CHRNB1        | 1.208269205  | 8.600638265 | 7.41E-06 |
| HSD17B4       | -1.322913152 | 11.17183211 | 7.41E-06 |
| PRPSAP1       | -0.901247212 | 8.850726301 | 7.42E-06 |
| TCN2          | -0.933949583 | 8.521526443 | 7.42E-06 |
| ADAM9         | 0.478096659  | 7.918004985 | 7.43E-06 |
| TMEM86A       | -3.064590254 | 11.17384703 | 7.44E-06 |
| CHGB          | 2.021060104  | 9.871054287 | 7.47E-06 |
| FAAH          | -1.948713051 | 9.057607619 | 7.54E-06 |
| GNA11         | -1.610489981 | 10.42733491 | 7.54E-06 |
| IRF5          | 0.4477098    | 7.963753535 | 7.54E-06 |
| KCNK5         | -1.451418806 | 9.463009079 | 7.54E-06 |
| MME           | -1.281079415 | 8.543516313 | 7.54E-06 |
| RABAC1        | 1.142811261  | 9.470528059 | 7.54E-06 |
| TMEM98        | -1.290390914 | 9.804039683 | 7.54E-06 |
| TPH1          | 1.608319094  | 8.241678412 | 7.54E-06 |
| PRLR          | -1.166510324 | 8.501037969 | 7.65E-06 |
| SLC5A4B       | -3.978050696 | 10.20716611 | 7.65E-06 |
| TINAGL1       | 1.297239035  | 8.734565653 | 7.65E-06 |
| XPNPEP2       | -3.426389723 | 10.75085471 | 7.65E-06 |
| CD93          | 0.417540993  | 7.825712287 | 7.88E-06 |
| 5031436O03RIK | 1.572211465  | 9.603593847 | 7.90E-06 |
| C530008M17RIK | -1.002003371 | 8.905403171 | 7.90E-06 |
| AGPS          | 0.848549185  | 8.803805444 | 8.06E-06 |
| FGD2          | 0.553671637  | 7.994745163 | 8.07E-06 |
| CCL25         | -1.975272467 | 10.32836322 | 8.52E-06 |
| CRYL1         | -1.768658465 | 10.64789676 | 8.52E-06 |
| 5730494J16RIK | 0.816319847  | 9.13613366  | 8.53E-06 |
| PLEKHG3       | 1.688087991  | 9.519685771 | 8.61E-06 |
| PPAP2A        | -1.074217555 | 9.377446129 | 8.61E-06 |
| CHCHD7        | -1.629357385 | 10.44087717 | 8.69E-06 |
| EFHA1         | -0.617737692 | 9.699898026 | 8.73E-06 |
| WARS          | 0.817156469  | 8.792160229 | 8.75E-06 |
| 5430437P03RIK | -0.536387498 | 9.762717486 | 8.83E-06 |
| BTC           | 1.944011992  | 8.922040401 | 8.83E-06 |
| OS9           | -0.897046898 | 10.3403852  | 8.83E-06 |
| ITGA2         | 0.909952641  | 8.059353266 | 8.88E-06 |
| DDIT4         | 2.196792287  | 9.403396123 | 8.98E-06 |
| PEPD          | -1.976331507 | 9.561334005 | 9.19E-06 |
| SFN           | 0.999572926  | 8.347279899 | 9.20E-06 |
| EDNRA         | 1.023975522  | 8.30500181  | 9.61E-06 |
| FST           | 1.33549257   | 8.083131064 | 9.71E-06 |
| LHFP          | 0.722414008  | 8.176922205 | 9.71E-06 |

|               |              |             |          |
|---------------|--------------|-------------|----------|
| SMOX          | 1.139094999  | 8.252603428 | 9.84E-06 |
| LOC100041004  | 4.081995406  | 8.637178574 | 9.90E-06 |
| S100A9        | 2.076948411  | 8.076103075 | 1.02E-05 |
| GPR172B       | -1.583280885 | 9.847767548 | 1.05E-05 |
| RAB3GAP2      | -1.265552505 | 9.418157875 | 1.07E-05 |
| SLC13A2       | -3.209965385 | 11.3731085  | 1.07E-05 |
| 1110038D17RIK | -0.851703248 | 10.25334505 | 1.09E-05 |
| RDH9          | -1.702316523 | 9.691959434 | 1.09E-05 |
| TNIK          | -0.600260967 | 8.38024834  | 1.10E-05 |
| D630036H09RIK | -1.105691961 | 8.578954479 | 1.12E-05 |
| DUSP4         | 0.617965101  | 7.788180331 | 1.12E-05 |
| LOC381105     | -0.720812068 | 8.586768435 | 1.12E-05 |
| NRG1          | 0.4718131    | 7.734120407 | 1.13E-05 |
| TTR           | 1.937368377  | 8.80100853  | 1.14E-05 |
| CTSK          | 0.364885602  | 7.945102177 | 1.16E-05 |
| AU018778      | -2.439421199 | 9.434095103 | 1.17E-05 |
| SCP2          | -1.955603953 | 10.71564756 | 1.19E-05 |
| CDK3          | 0.268319401  | 7.633484182 | 1.20E-05 |
| MEP1B         | -1.221148429 | 10.98596542 | 1.20E-05 |
| H2AFV         | -1.56265194  | 9.898322596 | 1.21E-05 |
| MMP14         | 0.981806735  | 8.681918459 | 1.21E-05 |
| CRISPLD2      | 0.337233306  | 7.717490819 | 1.23E-05 |
| H2-Q2         | -1.499777041 | 9.003963435 | 1.23E-05 |
| LY6A          | 4.072370877  | 12.44858161 | 1.23E-05 |
| MOBKL2B       | -0.668611904 | 8.615659024 | 1.23E-05 |
| TMEM119       | 1.020037249  | 8.07613415  | 1.23E-05 |
| ZFHX3         | 0.466448498  | 8.062203033 | 1.23E-05 |
| BC022224      | -1.597732028 | 10.75111497 | 1.24E-05 |
| OAT           | -2.156703274 | 12.08677688 | 1.24E-05 |
| 2810405K02RIK | -2.091297956 | 9.711550785 | 1.26E-05 |
| 4930477M19    | 0.763954895  | 8.161050212 | 1.26E-05 |
| ACY3          | -1.458214068 | 9.330142584 | 1.26E-05 |
| HECTD3        | -0.792824703 | 9.147060087 | 1.26E-05 |
| IGFBP5        | 3.332769999  | 10.30687961 | 1.26E-05 |
| 2410006H16RIK | 0.893938575  | 8.787018222 | 1.30E-05 |
| 5730525O22RIK | 0.520549604  | 8.254738568 | 1.30E-05 |
| 4931406C07RIK | -1.400217022 | 9.404440801 | 1.33E-05 |
| BMPER         | 0.657798841  | 7.896415764 | 1.33E-05 |
| S100A6        | 0.94584971   | 11.10972901 | 1.33E-05 |
| 1110021L09RIK | -1.150219486 | 8.714710208 | 1.35E-05 |
| GOLT1A        | -0.811973433 | 8.933293527 | 1.35E-05 |
| SESN1         | -1.345029642 | 9.303325048 | 1.35E-05 |
| LAMC1         | 1.215203611  | 8.857283969 | 1.40E-05 |
| IER3          | 2.595843935  | 10.16339866 | 1.42E-05 |
| RENBP         | 1.046865097  | 8.347715535 | 1.42E-05 |
| PLA2G12B      | -1.161699816 | 10.12082364 | 1.46E-05 |
| RMND1         | -0.623007254 | 8.659230781 | 1.49E-05 |
| SUOX          | 1.367245178  | 8.265850262 | 1.49E-05 |
| 2310016C08RIK | 1.864178522  | 8.429506471 | 1.52E-05 |
| LOC100047937  | -0.678195239 | 8.143661008 | 1.52E-05 |
| MAPK11        | 0.368425651  | 7.723536529 | 1.52E-05 |
| SLC27A2       | -2.080696882 | 9.168385029 | 1.52E-05 |
| 5730472N09RIK | -1.337513131 | 9.04999029  | 1.56E-05 |
| ABCB7         | -0.770194559 | 9.065752193 | 1.56E-05 |
| DUSP1         | 2.107152058  | 10.40844349 | 1.56E-05 |
| ALS2          | -0.667937191 | 8.854196424 | 1.57E-05 |
| MEP1A         | -1.722401705 | 8.841751175 | 1.57E-05 |
| ARL6IP1       | -1.170383764 | 11.79301671 | 1.58E-05 |

|               |              |             |          |
|---------------|--------------|-------------|----------|
| EG665509      | 1.425987915  | 8.451316047 | 1.60E-05 |
| UGT2B36       | -1.553400137 | 8.475043371 | 1.60E-05 |
| ANPEP         | -2.012667798 | 14.13686653 | 1.61E-05 |
| CDH16         | 0.826254433  | 7.831863006 | 1.61E-05 |
| CH25H         | 1.266292421  | 8.283855389 | 1.61E-05 |
| PREPL         | -1.635787394 | 11.16839815 | 1.61E-05 |
| CD44          | 0.520049792  | 7.97242914  | 1.72E-05 |
| CNDP2         | -1.045462565 | 8.591710663 | 1.72E-05 |
| DUSP3         | 0.46008968   | 7.800782997 | 1.72E-05 |
| ACAA1A        | -1.736367127 | 12.68203863 | 1.73E-05 |
| CLDN15        | -1.790590905 | 10.09999651 | 1.73E-05 |
| CXCL14        | 1.685042661  | 8.385390497 | 1.73E-05 |
| GRASP         | 0.63975717   | 8.028952989 | 1.73E-05 |
| RILP          | -0.5911753   | 8.478377085 | 1.73E-05 |
| TNFRSF11B     | 1.055440978  | 8.077067406 | 1.73E-05 |
| 4931406P16RIK | 0.444396821  | 8.598251801 | 1.74E-05 |
| ALDH1L1       | -0.569732647 | 8.083405338 | 1.74E-05 |
| H2-BL         | -3.328363116 | 13.31955827 | 1.74E-05 |
| GJA1          | 1.858254982  | 10.6104361  | 1.75E-05 |
| GLRX1         | -0.976019921 | 8.847562158 | 1.75E-05 |
| WFDC2         | 3.250150258  | 8.631597023 | 1.75E-05 |
| GMPPA         | -0.631588799 | 9.19262018  | 1.76E-05 |
| PLAT          | 2.400275454  | 8.465199007 | 1.76E-05 |
| PLK3          | 1.616339438  | 9.061821327 | 1.76E-05 |
| 4932441K18RIK | -0.298266797 | 8.016967025 | 1.77E-05 |
| PGAM5         | 1.103276833  | 9.248270245 | 1.77E-05 |
| FBLN1         | -1.453069485 | 9.328194941 | 1.79E-05 |
| PM20D1        | -0.665380562 | 8.049864339 | 1.79E-05 |
| ILDR1         | 1.01112676   | 8.090921189 | 1.81E-05 |
| TXNRD2        | -0.417615057 | 8.477786206 | 1.81E-05 |
| RASL11A       | 0.386970755  | 7.759158946 | 1.82E-05 |
| DGCR6         | -0.827445802 | 8.699032894 | 1.83E-05 |
| NPC1L1        | -1.923629766 | 10.65694835 | 1.93E-05 |
| AKR1B8        | 3.516857988  | 9.507090261 | 1.95E-05 |
| DYRK3         | 0.353280139  | 7.701100727 | 1.97E-05 |
| SLK           | 1.309444626  | 9.0691062   | 1.97E-05 |
| 2010001M06RIK | -1.023191552 | 8.785495404 | 1.99E-05 |
| BC014795      | 0.61495807   | 8.562870717 | 1.99E-05 |
| FHL2          | 0.62688901   | 9.182231785 | 1.99E-05 |
| LOC100047419  | -1.465987176 | 10.01644076 | 1.99E-05 |
| MDH2          | -1.122985755 | 11.58604866 | 1.99E-05 |
| NUS1          | 1.2090533    | 9.593650463 | 1.99E-05 |
| TBC1D2        | 0.874439149  | 8.172463104 | 1.99E-05 |
| H2-Q6         | -0.881871032 | 8.375950789 | 2.03E-05 |
| TSPAN12       | 0.782616085  | 8.007710957 | 2.06E-05 |
| SLC7A8        | -2.846736314 | 9.5167082   | 2.08E-05 |
| PERLD1        | -0.3973456   | 7.908741889 | 2.10E-05 |
| PDLIM7        | 1.44856249   | 8.741286105 | 2.12E-05 |
| CFB           | -0.72172957  | 8.805309795 | 2.13E-05 |
| EDN2          | -1.626458491 | 8.505370282 | 2.13E-05 |
| ESRRA         | -0.994524148 | 10.57013344 | 2.13E-05 |
| HTRA1         | 0.700678387  | 8.051439006 | 2.13E-05 |
| THNSL2        | -1.013033096 | 8.622156547 | 2.13E-05 |
| ACE           | -2.516663228 | 9.885608681 | 2.18E-05 |
| AY761184      | 2.755160937  | 11.57759212 | 2.18E-05 |
| H2-T23        | -1.868388866 | 11.99644427 | 2.18E-05 |
| NID1          | 0.863876096  | 8.094773562 | 2.18E-05 |
| CTSH          | 1.575726281  | 9.658831918 | 2.22E-05 |

|               |              |             |          |
|---------------|--------------|-------------|----------|
| LCN13         | 0.391782084  | 7.722823138 | 2.22E-05 |
| FCHO1         | 1.113638681  | 7.987275009 | 2.23E-05 |
| CYP4F13       | -1.754941975 | 10.63384548 | 2.26E-05 |
| PPP1R1B       | -1.458515809 | 9.752802671 | 2.26E-05 |
| 1190009E20RIK | 0.501437866  | 8.598387383 | 2.28E-05 |
| ACSF3         | -0.858831433 | 8.768118156 | 2.28E-05 |
| KLHDC10       | 0.49182284   | 9.972756597 | 2.28E-05 |
| 4732474O15RIK | 0.424001718  | 7.699643689 | 2.29E-05 |
| LAMA5         | 0.927952815  | 8.069282224 | 2.29E-05 |
| MAN2A1        | 0.521931383  | 9.476632459 | 2.29E-05 |
| PLCD3         | 0.686819796  | 7.788537203 | 2.29E-05 |
| SDC1          | 0.254073739  | 7.768475261 | 2.29E-05 |
| FARS2         | -0.683212082 | 9.985930471 | 2.32E-05 |
| CES5          | -2.067021785 | 9.002523688 | 2.33E-05 |
| TK2           | 0.659417948  | 8.491681122 | 2.33E-05 |
| FAHD1         | -2.714854242 | 11.06672949 | 2.35E-05 |
| FADD          | -0.442044614 | 8.872071712 | 2.37E-05 |
| 1110031102RIK | -0.645028884 | 8.344618239 | 2.44E-05 |
| ALDH1B1       | -2.254973035 | 9.335181769 | 2.44E-05 |
| E430039I23RIK | -0.55177287  | 11.44887159 | 2.56E-05 |
| CASP6         | -1.204562791 | 9.279805227 | 2.57E-05 |
| SERPINE2      | 0.705967454  | 8.01967567  | 2.57E-05 |
| SLC25A15      | -1.474815675 | 9.233509267 | 2.57E-05 |
| ST6GALNAC2    | -0.892492239 | 9.790484873 | 2.57E-05 |
| 2610307O08RIK | 0.376234402  | 7.679180664 | 2.58E-05 |
| SRPX2         | 0.627456522  | 7.894486435 | 2.58E-05 |
| BC046404      | -0.879391178 | 9.552423792 | 2.63E-05 |
| EMP1          | 0.995805077  | 13.12040741 | 2.63E-05 |
| PPP2CB        | 0.863911497  | 10.28447212 | 2.66E-05 |
| DGKZ          | -0.471905049 | 8.684990718 | 2.77E-05 |
| LCN2          | 2.928536368  | 8.785777241 | 2.79E-05 |
| CTPS          | 0.842699794  | 8.693738531 | 2.80E-05 |
| MGST2         | -1.295271598 | 12.56133854 | 2.80E-05 |
| ARF2          | 2.187435972  | 9.857440894 | 2.81E-05 |
| KRT84         | 1.146397519  | 7.897124824 | 2.81E-05 |
| MERTK         | -1.054587575 | 8.577435208 | 2.81E-05 |
| MLXIPL        | -1.669895221 | 9.457402535 | 2.81E-05 |
| FIS1          | -0.448543232 | 10.6474503  | 2.84E-05 |
| IFITM2        | 1.498601295  | 10.11289435 | 2.84E-05 |
| SLC6A4        | -1.379139291 | 9.230762429 | 2.84E-05 |
| TTYH3         | -0.546646002 | 8.057721188 | 2.84E-05 |
| EG630499      | -1.320700248 | 12.48663861 | 2.86E-05 |
| LOC100045343  | -1.123567608 | 11.47914102 | 2.87E-05 |
| MAOB          | -2.147594121 | 9.020398708 | 2.89E-05 |
| CLIC5         | -0.717185306 | 8.134077484 | 2.92E-05 |
| LONP2         | -0.90517913  | 9.729387421 | 2.92E-05 |
| BTNL2         | -0.858205118 | 8.371398874 | 2.95E-05 |
| PPP2R2D       | 0.498667003  | 9.120629408 | 2.95E-05 |
| IMPACT        | 0.776974824  | 8.427975641 | 2.96E-05 |
| B230342M21RIK | 1.147593566  | 9.052922935 | 2.98E-05 |
| COL4A2        | 1.446054461  | 8.701235704 | 2.98E-05 |
| PAOX          | 2.139172516  | 9.639332752 | 2.98E-05 |
| BC057627      | -0.665146516 | 9.405745526 | 2.99E-05 |
| MYADM         | 1.513463045  | 9.746795166 | 2.99E-05 |
| OBFC1         | 0.608264294  | 7.953963268 | 3.01E-05 |
| ENG           | 0.476341076  | 7.783625127 | 3.04E-05 |
| CD63          | 0.678675909  | 10.67035297 | 3.08E-05 |
| ATG9B         | 2.718451982  | 8.468318575 | 3.10E-05 |

|               |              |             |          |
|---------------|--------------|-------------|----------|
| CGEF2-PENDING | 0.429402255  | 7.712674294 | 3.10E-05 |
| F8A           | 0.857094195  | 9.305460081 | 3.10E-05 |
| PLVAP         | 1.861558029  | 9.231664815 | 3.10E-05 |
| RAB15         | 2.276192315  | 9.613875015 | 3.10E-05 |
| SOAT2         | -1.662116752 | 10.67687054 | 3.10E-05 |
| KLRG2         | 0.31688913   | 7.672566881 | 3.11E-05 |
| RAB8A         | -0.747519358 | 11.35007767 | 3.12E-05 |
| TCF21         | 1.067984884  | 8.108025192 | 3.12E-05 |
| 2010107E04RIK | -0.523125518 | 13.42031033 | 3.13E-05 |
| TUBB6         | 1.32506459   | 9.140631031 | 3.13E-05 |
| 2410002I01RIK | -0.25200064  | 7.868969709 | 3.16E-05 |
| NPY           | 2.457324839  | 8.389169628 | 3.16E-05 |
| SERPINA3F     | 1.154523773  | 7.993185226 | 3.17E-05 |
| C030003H22RIK | -0.574415661 | 7.915282131 | 3.18E-05 |
| COL6A1        | 0.899218718  | 8.920489097 | 3.18E-05 |
| LRG1          | 2.828172195  | 8.685908686 | 3.18E-05 |
| NDUFV2        | -0.555673991 | 12.18506674 | 3.18E-05 |
| BC039210      | 0.273732356  | 7.847758802 | 3.19E-05 |
| ITCH          | -0.371132046 | 8.064547935 | 3.19E-05 |
| TPST2         | 1.403186261  | 9.759024964 | 3.19E-05 |
| ACE2          | -1.921583996 | 9.947879728 | 3.21E-05 |
| MFGE8         | 1.857023073  | 10.1345887  | 3.25E-05 |
| EPB4.1L2      | 0.657078563  | 8.158547402 | 3.31E-05 |
| GMCL1         | -0.553731188 | 8.403535887 | 3.31E-05 |
| SGPL1         | -1.617945924 | 10.02811951 | 3.31E-05 |
| ZDHHC7        | -0.791106428 | 11.10026217 | 3.33E-05 |
| SLA           | 0.557782929  | 8.035365451 | 3.36E-05 |
| ABCD3         | -1.055633544 | 9.389783751 | 3.37E-05 |
| KRT36         | 1.020529594  | 7.914317549 | 3.43E-05 |
| MBOAT1        | 2.809967972  | 9.525777178 | 3.43E-05 |
| PLS3          | 0.352237514  | 7.930004612 | 3.43E-05 |
| TGFB1         | 0.516067157  | 7.806313052 | 3.43E-05 |
| UNC13B        | 0.702297369  | 9.050728364 | 3.43E-05 |
| S100A14       | 1.586915932  | 8.626707642 | 3.44E-05 |
| SFXN1         | -1.351075767 | 12.1986851  | 3.45E-05 |
| SDCBP2        | 1.229451253  | 10.78991412 | 3.55E-05 |
| WTIP          | 1.383807187  | 8.921264964 | 3.55E-05 |
| PYCR1         | -0.779540483 | 8.626698767 | 3.61E-05 |
| RBKS          | -0.472613577 | 8.303889856 | 3.61E-05 |
| H2-Q7         | -0.872642706 | 9.059833777 | 3.63E-05 |
| FLYWCH2       | 0.613149518  | 8.176079806 | 3.72E-05 |
| SERPINA3G     | 1.866281711  | 9.116431348 | 3.73E-05 |
| HINT2         | -0.956789167 | 11.17415906 | 3.74E-05 |
| SLC43A2       | -0.264786935 | 7.78179281  | 3.75E-05 |
| ANKRD22       | 1.139143889  | 8.124305425 | 3.77E-05 |
| AW112037      | -1.467968998 | 10.67442346 | 3.79E-05 |
| UBFD1         | -0.576735555 | 8.528959305 | 3.80E-05 |
| SEC14L2       | -1.137739918 | 8.554486725 | 3.83E-05 |
| LCMT1         | -0.771861972 | 8.892287733 | 3.84E-05 |
| PYCR2         | 1.195781987  | 9.146557655 | 3.84E-05 |
| ZFP809        | 0.525189785  | 8.003480333 | 3.84E-05 |
| BST1          | -0.775969426 | 8.051287812 | 3.85E-05 |
| CTDSPL        | -0.728492784 | 8.758347132 | 3.85E-05 |
| DPYD          | -0.449247504 | 7.780991672 | 3.85E-05 |
| LOC632667     | 0.62221588   | 11.23384666 | 3.85E-05 |
| SCARB2        | 0.800152176  | 8.862143471 | 3.85E-05 |
| SLC35C2       | -1.804099629 | 9.848580227 | 3.85E-05 |
| TMEM63A       | 0.442103939  | 8.384356614 | 3.85E-05 |

|               |              |             |          |
|---------------|--------------|-------------|----------|
| APOBEC1       | 1.105523016  | 10.85702902 | 3.86E-05 |
| BOK           | 1.105382354  | 8.759867    | 3.86E-05 |
| ADSSL1        | 0.259091213  | 7.709375208 | 3.92E-05 |
| PRKCDBP       | 1.203697182  | 8.402452649 | 3.92E-05 |
| INSL6         | -0.981930377 | 9.552667226 | 3.94E-05 |
| SERPING1      | 1.242365523  | 9.379168578 | 3.97E-05 |
| TIMP1         | 1.573584718  | 8.575443011 | 3.97E-05 |
| FURIN         | 1.080743708  | 10.39769231 | 4.00E-05 |
| RIN3          | 0.799762452  | 8.417347545 | 4.01E-05 |
| LY6F          | 0.423082938  | 7.65954664  | 4.03E-05 |
| MRPS6         | 1.494094739  | 9.792245054 | 4.03E-05 |
| SLC41A2       | -0.653566067 | 8.349629166 | 4.04E-05 |
| SMOC1         | 1.276722838  | 8.172400826 | 4.06E-05 |
| POLG2         | -0.684786391 | 8.278360745 | 4.07E-05 |
| ANKRD46       | -0.486629712 | 8.217762962 | 4.08E-05 |
| CNRIP1        | 0.428484341  | 7.936709635 | 4.08E-05 |
| LMNA          | 1.225034888  | 9.544569185 | 4.11E-05 |
| ERGIC1        | 0.861915354  | 9.026764659 | 4.12E-05 |
| CENPT         | 0.634309091  | 8.385814638 | 4.14E-05 |
| VWF           | 0.698277107  | 8.034689742 | 4.19E-05 |
| ATP5O         | -0.892682217 | 11.33078695 | 4.20E-05 |
| HDGF          | 0.829644245  | 10.56767646 | 4.20E-05 |
| MSC           | 1.197748824  | 8.58383802  | 4.23E-05 |
| SLC5A12       | -2.398411518 | 9.305222721 | 4.23E-05 |
| MANEA         | -0.360104805 | 8.433856644 | 4.24E-05 |
| A630084D02RIK | 1.448888691  | 9.844063997 | 4.30E-05 |
| CCNG1         | 1.241966275  | 9.024324934 | 4.30E-05 |
| LRIG3         | -1.264708428 | 10.10358011 | 4.32E-05 |
| SLC22A4       | -0.946180698 | 8.289098095 | 4.32E-05 |
| 9130213B05RIK | 0.70791597   | 9.042295499 | 4.34E-05 |
| CS            | -0.773471177 | 11.55723121 | 4.34E-05 |
| FAM158A       | -1.084048417 | 8.838759078 | 4.34E-05 |
| SLC5A1        | -2.215295971 | 11.63322145 | 4.34E-05 |
| DHCR7         | -0.333866134 | 7.877152977 | 4.36E-05 |
| ATPAF2        | -0.487635016 | 8.562038584 | 4.37E-05 |
| DHH           | 0.706519616  | 7.785679653 | 4.41E-05 |
| RDH7          | -1.914498762 | 8.824301412 | 4.49E-05 |
| PSCA          | 2.671104887  | 8.580127107 | 4.52E-05 |
| FBXO25        | -1.354022084 | 9.696095033 | 4.55E-05 |
| RFC5          | -0.23070947  | 7.9797785   | 4.55E-05 |
| TXNIP         | 1.08165598   | 11.72888345 | 4.55E-05 |
| 2010305C02RIK | -1.257820108 | 9.438935629 | 4.56E-05 |
| TMEM176A      | 1.029198049  | 8.805527061 | 4.56E-05 |
| 3110043O21RIK | 0.364365754  | 8.040741212 | 4.57E-05 |
| BCL10         | 0.471902765  | 10.01331157 | 4.60E-05 |
| DNM1L         | 0.438816715  | 8.794307127 | 4.60E-05 |
| VIL1          | -1.376984311 | 11.60984818 | 4.61E-05 |
| RNF5          | -0.643697888 | 8.912078114 | 4.66E-05 |
| ANXA1         | 0.505023481  | 7.694364646 | 4.67E-05 |
| SLC25A11      | -0.606014976 | 9.267893797 | 4.67E-05 |
| AXL           | 1.148189151  | 8.736735645 | 4.68E-05 |
| LRP12         | -1.148690631 | 9.156628766 | 4.68E-05 |
| A530082C11RIK | -0.500278162 | 8.084959534 | 4.77E-05 |
| A130092J06RIK | -1.697529137 | 9.337015602 | 4.80E-05 |
| LY6C1         | 3.185340165  | 8.888798041 | 4.82E-05 |
| 6330406I15RIK | 0.923617587  | 8.03748866  | 4.83E-05 |
| BAIAP2L2      | -0.698672116 | 8.307957641 | 4.84E-05 |
| DHRS4         | -0.518710204 | 8.10404478  | 4.84E-05 |

|               |              |             |          |
|---------------|--------------|-------------|----------|
| SLC25A45      | -2.648688098 | 11.29069778 | 4.84E-05 |
| CDX2          | -0.598383852 | 10.87549815 | 4.93E-05 |
| NOTCH4        | 0.909514798  | 8.316053846 | 4.93E-05 |
| RAMP2         | 1.308849911  | 8.87980702  | 4.93E-05 |
| SNX25         | -0.515269437 | 8.153786672 | 4.93E-05 |
| TSHZ3         | 0.381985909  | 7.898529471 | 4.93E-05 |
| SUSD2         | -2.380283069 | 9.430820232 | 4.96E-05 |
| ZMAT3         | 0.780928659  | 8.299529293 | 4.98E-05 |
| TPST1         | 0.482446957  | 8.048049432 | 5.02E-05 |
| ITPKA         | -0.899916914 | 8.24935233  | 5.03E-05 |
| LOC639715     | -0.984070674 | 8.954427813 | 5.03E-05 |
| CCAR1         | -0.406401497 | 9.321989551 | 5.06E-05 |
| AW146242      | 0.709837908  | 8.502516303 | 5.10E-05 |
| C1GALT1       | 0.818485199  | 8.319764938 | 5.10E-05 |
| CFP           | 1.497916063  | 9.26985327  | 5.10E-05 |
| ENTPD2        | -0.775207441 | 9.309915209 | 5.10E-05 |
| LOC100044101  | -0.339501141 | 8.320847508 | 5.10E-05 |
| FPR2          | 1.072761685  | 7.972770893 | 5.11E-05 |
| LOC100046144  | 1.661102241  | 9.643834979 | 5.15E-05 |
| LOC382092     | 0.808832013  | 11.30510968 | 5.16E-05 |
| LMAN1         | -0.840859619 | 9.515007573 | 5.17E-05 |
| LOC665181     | -0.571405978 | 9.148578537 | 5.17E-05 |
| LOC100040525  | 1.623326924  | 10.29342231 | 5.28E-05 |
| NDRG3         | -0.453220092 | 8.219033662 | 5.30E-05 |
| FA2H          | 1.005575083  | 7.912495652 | 5.33E-05 |
| NDUFS7        | -0.826290654 | 11.82234791 | 5.43E-05 |
| SEC31A        | -1.010554722 | 9.82771113  | 5.43E-05 |
| AES           | -0.677314157 | 10.315045   | 5.44E-05 |
| 2310047D13RIK | 1.019398379  | 8.404331528 | 5.49E-05 |
| ENO1          | 1.063855554  | 11.20864601 | 5.50E-05 |
| CML4          | -1.924967475 | 10.07113703 | 5.52E-05 |
| SMARCC2       | -0.337314516 | 8.274962694 | 5.52E-05 |
| AGPAT9        | -0.696688236 | 9.080170528 | 5.57E-05 |
| CSTB          | 1.217024986  | 12.21134585 | 5.57E-05 |
| SDHB          | -0.823585021 | 9.461154921 | 5.61E-05 |
| 4930546H06RIK | 0.218876447  | 7.620625785 | 5.69E-05 |
| LOC676389     | -2.136787281 | 9.535934491 | 5.69E-05 |
| F2RL3         | 0.79494471   | 8.020052055 | 5.72E-05 |
| ZDHHC13       | 1.208737721  | 9.30883468  | 5.78E-05 |
| 1190003J15RIK | 1.88295035   | 9.972463814 | 5.81E-05 |
| GJA4          | 0.467141651  | 7.832092324 | 5.81E-05 |
| ADM           | 0.319012145  | 7.705014707 | 5.84E-05 |
| ERLIN2        | -0.448381065 | 8.626511159 | 5.84E-05 |
| RAI3          | 0.538034584  | 7.988901328 | 5.84E-05 |
| LRRC50        | -0.62165842  | 8.411049542 | 5.87E-05 |
| LYZ1          | 1.727977336  | 12.37239892 | 5.88E-05 |
| GLTPD2        | -0.410841886 | 7.827331028 | 5.91E-05 |
| ARPC1B        | 0.567340304  | 10.73705428 | 5.95E-05 |
| CCND3         | 0.562050429  | 8.542820025 | 5.95E-05 |
| LOC100038926  | 2.082120464  | 11.84384338 | 5.95E-05 |
| TMEM135       | -0.599678087 | 8.090011585 | 5.95E-05 |
| IMMP2L        | -0.808236049 | 8.476168847 | 5.98E-05 |
| PRKACA        | -0.534733316 | 9.194736588 | 6.01E-05 |
| DLG5          | 0.625066337  | 9.151739711 | 6.09E-05 |
| 1110008P14RIK | 0.614316669  | 9.339649121 | 6.12E-05 |
| IDH3B         | -0.961815418 | 10.71466698 | 6.14E-05 |
| SLC11A1       | 0.603697469  | 8.178114885 | 6.14E-05 |
| OSBPL6        | -1.095018045 | 8.894145604 | 6.15E-05 |

|               |              |             |          |
|---------------|--------------|-------------|----------|
| SLC16A5       | -1.241343967 | 9.257693346 | 6.20E-05 |
| ST6GALNAC4    | 0.272937581  | 7.628726288 | 6.20E-05 |
| ADD3          | -1.046082911 | 9.01423217  | 6.27E-05 |
| DPYSL3        | 0.496630849  | 7.831596066 | 6.29E-05 |
| HEXB          | -1.416429145 | 9.17626337  | 6.29E-05 |
| EIF4EBP1      | 1.688176369  | 10.74587027 | 6.36E-05 |
| ANXA11        | 0.745524642  | 10.03283073 | 6.40E-05 |
| EPHX2         | -2.403825232 | 10.31803745 | 6.40E-05 |
| PTGES         | 0.441381448  | 7.742258562 | 6.43E-05 |
| 9530027K23RIK | 0.440594146  | 8.524354969 | 6.48E-05 |
| PPP2R5D       | -0.52012928  | 9.362935391 | 6.52E-05 |
| APOL7A        | -1.680095796 | 10.68814361 | 6.55E-05 |
| ATP1B1        | -0.978683168 | 13.25701572 | 6.64E-05 |
| TMBIM6        | -0.988885334 | 14.26665651 | 6.68E-05 |
| AU040320      | -0.712730485 | 10.50869466 | 6.70E-05 |
| NADSYN1       | -0.326642144 | 7.909127672 | 6.75E-05 |
| RER1          | -0.495541809 | 8.638682208 | 6.75E-05 |
| TRIP10        | 0.333185317  | 8.359529683 | 6.75E-05 |
| 9130204K15RIK | 0.293773348  | 7.627083824 | 6.82E-05 |
| ALS2CR4       | 0.233904963  | 7.780770652 | 6.82E-05 |
| BAX           | 0.825048211  | 8.701438066 | 6.84E-05 |
| GOLPH3L       | -0.54395567  | 8.42029072  | 6.84E-05 |
| ABR           | -0.559872625 | 8.448979757 | 6.92E-05 |
| COBL          | -0.686858624 | 8.422347359 | 6.92E-05 |
| ETFA          | -0.747766098 | 10.83780939 | 6.92E-05 |
| CD9           | 1.870544547  | 9.031461458 | 6.98E-05 |
| COL6A2        | 0.324823237  | 7.87508641  | 7.05E-05 |
| CYP2S1        | -1.496215807 | 9.770360801 | 7.05E-05 |
| GPRC5A        | 2.554978165  | 10.35175566 | 7.05E-05 |
| S100A13       | 1.091912149  | 10.05280509 | 7.05E-05 |
| SLC7A7        | -0.852573509 | 8.700765983 | 7.05E-05 |
| SOLH          | -0.640198626 | 8.62835529  | 7.23E-05 |
| EG632778      | -1.411194985 | 10.38011294 | 7.28E-05 |
| SLC25A17      | 0.556705277  | 8.765870307 | 7.28E-05 |
| 2010001J22RIK | -1.475853327 | 8.853938993 | 7.30E-05 |
| LY6G6C        | 1.78096226   | 8.557833225 | 7.34E-05 |
| GALNT10       | -0.579555301 | 8.927180406 | 7.40E-05 |
| APOC3         | -3.614004991 | 13.16816731 | 7.41E-05 |
| 4631426J05RIK | 0.379963423  | 7.872663026 | 7.46E-05 |
| WIPF3         | -0.992953806 | 8.429305384 | 7.46E-05 |
| EG433224      | -0.581052838 | 8.764205377 | 7.49E-05 |
| PLOD3         | 0.816923531  | 9.698921289 | 7.52E-05 |
| THBD          | 0.571203394  | 7.963985756 | 7.53E-05 |
| CYP2D26       | -1.858082555 | 9.406192131 | 7.68E-05 |
| TIRAP         | 0.371773531  | 8.057071769 | 7.69E-05 |
| ATP5J2        | -0.964454976 | 13.48401842 | 7.76E-05 |
| LOC674135     | -1.279366204 | 11.89168127 | 7.76E-05 |
| RNU6          | 1.380494232  | 12.55557874 | 7.76E-05 |
| CMBL          | -1.065678992 | 8.624883371 | 7.79E-05 |
| ATG12         | -0.446752131 | 9.674581416 | 7.87E-05 |
| AMOTL1        | 0.704503693  | 8.08114074  | 7.93E-05 |
| LOC100046953  | 0.399583435  | 7.965675497 | 7.95E-05 |
| CLIC1         | 0.972726744  | 9.925826035 | 7.98E-05 |
| PRKX          | 1.004557288  | 9.567157712 | 7.98E-05 |
| SBK           | -1.034409364 | 8.621415492 | 7.98E-05 |
| AA407270      | 0.346537535  | 8.982605244 | 8.05E-05 |
| PPP1R14B      | 0.345002609  | 8.434426706 | 8.05E-05 |
| NAIP5         | -1.448281796 | 8.781372677 | 8.07E-05 |



|                |              |             |             |
|----------------|--------------|-------------|-------------|
| PJA1           | -0.675858569 | 9.500041057 | 8.14E-05    |
| HISPPD2A       | -0.618168226 | 8.423315535 | 8.17E-05    |
| EHD4           | 0.879592503  | 9.357042955 | 8.20E-05    |
| AVP11          | 0.593742259  | 8.00100107  | 8.26E-05    |
| IPAS           | 0.774802371  | 8.139685527 | 8.31E-05    |
| ANKRD50        | 1.308732368  | 9.104253675 | 8.44E-05    |
| YIPF1          | -0.656314532 | 9.325289873 | 8.44E-05    |
| SURF4          | -0.557702883 | 11.63553374 | 8.53E-05    |
| 2810025M15RIK  | 1.045352812  | 9.305505541 | 8.57E-05    |
| WASL           | 0.787297004  | 10.99489948 | 8.57E-05    |
| ZFP35          | -0.23122909  | 8.164613884 | 8.57E-05    |
| 2210008N01RIK  | 0.614550071  | 7.994113734 | 8.58E-05    |
| GUCY2C         | -0.444005376 | 8.178135106 | 8.58E-05    |
| GM239          | -0.486477214 | 8.500855333 | 8.61E-05    |
| AW555464       | 0.561499206  | 10.60900736 | 8.64E-05    |
| 2210410E06RIK  | 1.289034961  | 10.65151419 | 8.66E-05    |
| PLA2G2E        | 0.418467869  | 7.66961061  | 8.66E-05    |
| SPRED1         | 0.603747817  | 8.681551448 | 8.66E-05    |
| A530026H04RIK  | 0.294196978  | 7.850110171 | 8.68E-05    |
| DUSP11         | 0.605237841  | 10.44619552 | 8.68E-05    |
| LOC385644      | 0.547510161  | 7.684804475 | 8.68E-05    |
| 4833421E05RIK  | -0.270324417 | 7.925369637 | 8.78E-05    |
| EGFR           | 1.120011562  | 8.530482353 | 8.79E-05    |
| C79267         | 0.466067178  | 7.898924463 | 8.84E-05    |
| WBSCR14        | -0.783940814 | 8.320678027 | 8.85E-05    |
| PEA15          | 0.706905106  | 8.385610547 | 8.87E-05    |
| MMP10          | 2.702366803  | 8.922653417 | 8.96E-05    |
| GALM           | -1.111574209 | 8.669206926 | 9.01E-05    |
| LMCD1          | 0.429629681  | 7.831036726 | 9.01E-05    |
| EIF3S4         | 1.233242967  | 10.54951881 | 9.03E-05    |
| MSI2           | 0.378346407  | 7.892809364 | 9.03E-05    |
| ATP1B3         | 0.880263788  | 10.09207836 | 9.04E-05    |
| IPPK           | 1.528756204  | 9.404233906 | 9.04E-05    |
| ACP6           | -1.001293334 | 9.587876496 | 9.06E-05    |
| LOC100046457   | 0.56587908   | 8.364685907 | 9.06E-05    |
| SPRY3          | -1.085503707 | 8.464826004 | 9.06E-05    |
| 8430408G22RIK  | 0.449804802  | 7.741632295 | 9.09E-05    |
| DNTTIP1        | 0.547094137  | 11.05289032 | 9.09E-05    |
| DDHD2          | -1.020174189 | 9.011895958 | 9.10E-05    |
| HEPH           | -0.533463883 | 8.723892377 | 9.11E-05    |
| AREG           | 3.516757936  | 11.60263046 | 9.40E-05    |
| HSD3B7         | 0.785198804  | 9.983267643 | 9.40E-05    |
| NLGN2          | 0.410940699  | 7.890112817 | 9.40E-05    |
| 2200002D01RIK  | -1.116537896 | 11.49668866 | 9.59E-05    |
| RPS12          | -0.381215436 | 14.27037197 | 9.60E-05    |
| BBS7           | 0.189191444  | 7.777924186 | 9.63E-05    |
| LOC100047261   | 0.894127044  | 12.30377319 | 9.63E-05    |
| EMILIN2        | 0.246380665  | 7.656823428 | 9.65E-05    |
| ACADVL         | -0.783585718 | 10.205671   | 9.76E-05    |
| AL022832       | 0.58949978   | 11.40774557 | 9.82E-05    |
| GPX3           | 1.665218264  | 9.543537543 | 9.91E-05    |
| D17H6S56E-5    | 0.754615476  | 8.211869478 | 9.93E-05    |
| PLD1           | -1.072034291 | 9.593157927 | 9.95E-05    |
| P2RY5          | 0.885813299  | 9.447415134 | 9.99E-05    |
| PQLC1          | 1.254964451  | 9.080554786 | 1.00E-04    |
| SCL0015365.1_6 | 1.351219634  | 7.936837294 | 0.000100084 |
| GLUD1          | -1.80973403  | 11.7448188  | 0.000100291 |
| LAMA1          | 0.507697314  | 7.776494468 | 0.000100291 |

|                  |              |             |             |
|------------------|--------------|-------------|-------------|
| FCGR4            | 1.690721499  | 9.290479622 | 0.0001016   |
| KCNJ8            | 0.688676029  | 8.108542308 | 0.000101619 |
| ADCK5            | -1.134134532 | 8.81187796  | 0.000101784 |
| NUMB             | -0.442548452 | 8.293295128 | 0.000101831 |
| 1810020D17RIK    | -1.828560297 | 9.402512598 | 0.000101988 |
| CKMT1            | -0.842893756 | 12.50426125 | 0.000101988 |
| LOC383942        | 0.700304868  | 9.290364757 | 0.000102414 |
| SLC7A9           | -1.385882234 | 11.26751738 | 0.000102414 |
| NME7             | -0.632044487 | 11.20922497 | 0.000103783 |
| CLPP             | 0.504392531  | 10.2891625  | 0.000104384 |
| BAHCC1           | -0.43097043  | 7.966880628 | 0.00010654  |
| CRAT             | -0.76022792  | 8.34494401  | 0.00010654  |
| MTMR12           | -0.446950571 | 8.658864018 | 0.00010654  |
| NOS3             | 0.244371775  | 7.642396537 | 0.00010654  |
| PDGFRA           | 0.870127442  | 8.627934848 | 0.00010654  |
| WBP5             | 1.186651603  | 10.04434296 | 0.00010654  |
| CLDN4            | 2.31592882   | 11.8378861  | 0.000107144 |
| LGMN             | 2.352434167  | 10.563633   | 0.000107948 |
| AA960436         | 0.599259209  | 8.801622632 | 0.000108246 |
| POLE3            | -0.286167909 | 8.717982404 | 0.00010881  |
| C130027E04RIK    | 0.607409716  | 8.295067905 | 0.000109117 |
| 2810423O19RIK    | 0.773566034  | 8.664837131 | 0.000112943 |
| DGKA             | -0.957498018 | 9.899440501 | 0.000113734 |
| 2210016F16RIK    | -1.023093814 | 8.839911004 | 0.000114441 |
| FNDC3B           | 0.727971981  | 8.681341624 | 0.000114867 |
| ITGA5            | 0.346580753  | 7.764456247 | 0.000114867 |
| LMAN2            | -0.789112896 | 9.246424351 | 0.000114867 |
| PVRL3            | -0.44055579  | 9.938997317 | 0.000114867 |
| APEH             | -1.015468029 | 11.3475845  | 0.000115049 |
| CLRN3            | -1.04047469  | 10.57442196 | 0.000115049 |
| GM484            | 1.48876459   | 8.293421128 | 0.000115468 |
| CD8B             | -0.888438877 | 9.950380735 | 0.000116784 |
| AU022508         | 0.808843937  | 8.578742717 | 0.000117922 |
| B4GALNT2         | -1.672591281 | 10.77059699 | 0.000118163 |
| CYP11A1          | 0.324407738  | 7.727581656 | 0.000118566 |
| NDEL1            | 0.536703199  | 9.452374025 | 0.000118566 |
| SCL0002507.1_236 | -1.986402971 | 10.37956143 | 0.000118566 |
| TNNI2            | 1.240520315  | 8.053609161 | 0.000118577 |
| SYPL2            | -0.371350049 | 7.787423494 | 0.000119005 |
| RAB17            | -0.414667808 | 7.987756947 | 0.000119157 |
| 1200002N14RIK    | 0.432380013  | 7.839293644 | 0.000119231 |
| GSTK1            | -1.853680104 | 10.2834068  | 0.000119231 |
| IHH              | -0.559214357 | 8.305366485 | 0.000119231 |
| TMEM184A         | -0.860827541 | 9.788043796 | 0.000119231 |
| FMNL3            | 0.482143192  | 7.90021206  | 0.00011953  |
| LOC100045300     | 0.436587614  | 11.28403558 | 0.00011953  |
| COQ4             | -0.34465964  | 8.057135443 | 0.000120619 |
| MTCH2            | -1.210101512 | 9.615760349 | 0.000120619 |
| PRR15            | -1.920418058 | 11.26684092 | 0.000120619 |
| RASGRP4          | -0.831503754 | 9.638767295 | 0.000120619 |
| TMEM199          | 0.913434991  | 9.179304507 | 0.000120983 |
| DHX32            | 0.772946737  | 9.838491841 | 0.000121059 |
| H2-Q8            | -0.674106703 | 8.422697016 | 0.000121059 |
| NAIP2            | -0.507263778 | 8.341468186 | 0.000121059 |
| UBXN1            | 0.632788553  | 11.45151827 | 0.000121059 |
| GNPTG            | -0.511916434 | 10.32921115 | 0.000121155 |
| OSR2             | -2.529065268 | 10.09200172 | 0.000121155 |
| 1110012O05RIK    | 1.032491265  | 10.338379   | 0.000121169 |

|               |              |             |             |
|---------------|--------------|-------------|-------------|
| FKBP1A        | 1.096676674  | 10.68566062 | 0.000121357 |
| SLC24A6       | 0.453828835  | 8.377723031 | 0.000121842 |
| CRTAP         | 0.335873616  | 7.938391646 | 0.000123023 |
| GADD45G       | 0.785355867  | 9.695342433 | 0.000124885 |
| MLYCD         | -0.541386836 | 8.779324936 | 0.000124885 |
| NSF           | 0.875006074  | 9.25664397  | 0.000124885 |
| CYP1B1        | 0.58031514   | 7.972055099 | 0.000125047 |
| MLP           | 0.259220063  | 7.679867643 | 0.000125645 |
| ASPRV1        | 0.179586981  | 7.635801866 | 0.000126286 |
| P2RY6         | 1.37342      | 8.977740605 | 0.000126642 |
| HK1           | 0.325168655  | 7.65089482  | 0.000127204 |
| 2400010C15RIK | -0.529132942 | 12.39060059 | 0.000127956 |
| IFITM1        | 1.675527828  | 9.270161451 | 0.000128956 |
| RBL1          | -0.25519349  | 7.846787769 | 0.000128956 |
| KCNE4         | 0.345114845  | 7.746408426 | 0.000129212 |
| PLA2G7        | 0.217947655  | 7.651140902 | 0.00012954  |
| 1110020P15RIK | -0.360221661 | 13.42387585 | 0.00012955  |
| 2310033P09RIK | -0.351302309 | 8.338195967 | 0.00012955  |
| UBE2H         | 0.534047557  | 8.617183353 | 0.000130515 |
| TMEM205       | -0.820069077 | 9.934052852 | 0.000131016 |
| 2610027C15RIK | 0.69554062   | 8.0748963   | 0.000131213 |
| VPS37B        | 0.904261802  | 9.787604385 | 0.000134088 |
| CALM3         | -0.521403184 | 11.72536628 | 0.000134436 |
| LOC100047093  | 0.720096414  | 8.899965333 | 0.000134436 |
| PLK2          | 1.009893448  | 8.249019986 | 0.000134436 |
| ASS1          | 0.496501884  | 8.129120865 | 0.000134946 |
| GREM1         | 1.328747396  | 8.592550986 | 0.000134946 |
| LOC622404     | -0.625670262 | 9.438474018 | 0.000134946 |
| 2310007H09RIK | -0.237984973 | 7.754175632 | 0.000136431 |
| ASPA          | -0.487975027 | 7.90730092  | 0.000136431 |
| GPBP1         | -0.620386452 | 9.023362121 | 0.000140095 |
| ANXA4         | -0.634289012 | 10.00280333 | 0.000140227 |
| TRIM10        | 1.173166257  | 7.985437612 | 0.000140333 |
| CYP7B1        | 0.32271478   | 7.892045035 | 0.000140706 |
| SCT           | 1.208270461  | 12.85469274 | 0.000140706 |
| GGTA1         | 0.364815199  | 7.883706823 | 0.000141277 |
| 5730406M06RIK | 0.316701366  | 8.346205254 | 0.000141411 |
| BC025546      | 0.411108807  | 8.785702856 | 0.000141411 |
| EIF2B4        | 0.578450975  | 10.08385635 | 0.000143542 |
| BCL11B        | -0.34501261  | 8.268173962 | 0.000144453 |
| METTL7B       | -1.812743919 | 8.813299352 | 0.000144492 |
| SLC25A5       | -0.741265172 | 13.62410194 | 0.000144518 |
| PHLDA2        | 1.710469031  | 8.677535554 | 0.000144797 |
| CNPY2         | -0.596964116 | 9.192882101 | 0.000145357 |
| NDE1          | 0.416608236  | 8.192717936 | 0.000145424 |
| SFRS3         | -0.336743879 | 8.201822801 | 0.000145424 |
| CYTH4         | 0.413356967  | 8.028049404 | 0.000146566 |
| PPL           | 0.69188057   | 7.956794707 | 0.00014714  |
| ACSL5         | -1.132954415 | 12.77843155 | 0.000147755 |
| CYGB          | 0.956582035  | 9.008260081 | 0.000149861 |
| SEPN1         | 0.585062591  | 8.218355073 | 0.000150294 |
| AQP3          | -1.088417912 | 8.593868078 | 0.000150651 |
| TMEM14C       | -0.510381328 | 10.42456893 | 0.000150651 |
| LOC240672     | 1.3395081    | 9.029499487 | 0.000151723 |
| 5830411120    | 0.981435625  | 8.907710247 | 0.000153629 |
| CDKN1A        | 1.06144674   | 11.53683841 | 0.000153891 |
| 9530008L14RIK | -0.201085386 | 7.706926771 | 0.000155148 |
| MGC18837      | -0.780733843 | 9.409513388 | 0.000155148 |

|               |              |             |             |
|---------------|--------------|-------------|-------------|
| TMEM22        | 0.552119245  | 7.768990447 | 0.000155148 |
| EAR2          | 0.874048729  | 7.942029964 | 0.000157265 |
| MYD116        | 1.865867055  | 8.700014175 | 0.00015733  |
| TMCC1         | -0.444809207 | 8.313331439 | 0.00015733  |
| HPGD          | -2.124043387 | 9.425713327 | 0.000157563 |
| TXNDC13       | 0.414340158  | 8.347986568 | 0.000158039 |
| HAGH          | -1.029573643 | 9.481475653 | 0.000158202 |
| NCDN          | 0.276226194  | 8.022430444 | 0.000158202 |
| SLAIN2        | -0.526426219 | 8.949510507 | 0.000158331 |
| ARHGEF11      | -0.642986027 | 9.847439989 | 0.000158352 |
| DEFA1         | 1.263392316  | 12.23918464 | 0.000158429 |
| 1110002B05RIK | -1.052133649 | 9.813965706 | 0.000158983 |
| DNAJC4        | -0.492842756 | 8.527730398 | 0.000159169 |
| PTPN12        | 0.22974148   | 7.908969323 | 0.000159169 |
| AHNAK         | 1.075455082  | 10.86968878 | 0.000160415 |
| DORZ1         | -0.480470172 | 8.094953302 | 0.000160442 |
| EFCAB4A       | 0.202473486  | 8.018802167 | 0.000160442 |
| EIF2AK1       | -0.589298162 | 9.651534189 | 0.000160442 |
| HPRT1         | 0.500234369  | 9.793258066 | 0.000160442 |
| ITGB4         | 0.878635587  | 11.34180315 | 0.000160442 |
| MIF           | 0.913551087  | 11.99353939 | 0.000160442 |
| RAB31         | 1.6915668    | 9.939728304 | 0.000160442 |
| TTLL2         | -0.937967664 | 8.542280201 | 0.000160442 |
| FSCN1         | 0.255181975  | 7.761869649 | 0.000161397 |
| 2810439F02RIK | -0.551160685 | 7.989955194 | 0.000162114 |
| EIF3G         | 1.216981021  | 10.22955874 | 0.0001629   |
| 1810022C23RIK | -2.107845516 | 9.116511117 | 0.000163574 |
| ARC           | 0.531576207  | 7.747021301 | 0.000164428 |
| CLIC4         | 1.929015611  | 9.960509549 | 0.000164566 |
| UGT1A1        | -0.637735207 | 7.919982507 | 0.000164643 |
| PIK3R2        | -0.355504054 | 8.054468117 | 0.000164936 |
| EGFL7         | 0.730883136  | 8.188416996 | 0.000166074 |
| IFNGR2        | -0.81124059  | 8.955726224 | 0.000166074 |
| LOC100039496  | -0.333635006 | 7.671684116 | 0.000166074 |
| LOX           | 0.230250798  | 7.61853771  | 0.000166107 |
| B4GALNT1      | -0.936485514 | 9.859828156 | 0.000166217 |
| DBNDD2        | 0.78042322   | 10.31335028 | 0.000166874 |
| PLA2G15       | 0.594790793  | 8.284580462 | 0.000166874 |
| BGN           | 1.843485661  | 10.13628275 | 0.000166997 |
| TBL1XR1       | -0.385545807 | 8.136024224 | 0.000166997 |
| TM6SF2        | -0.989193837 | 10.3906302  | 0.000166997 |
| TRIM8         | 1.051571682  | 11.19944456 | 0.000166997 |
| DAB1          | -0.569481229 | 7.935248162 | 0.000167365 |
| C730029F17RIK | 0.663971395  | 8.952168839 | 0.000168251 |
| EAR11         | 0.433887929  | 7.7213683   | 0.000168754 |
| INHBA         | 0.298423433  | 7.657248712 | 0.000168754 |
| 1110003E01RIK | 0.497767597  | 11.83448843 | 0.000169621 |
| PHLDA1        | 2.433663548  | 10.45355996 | 0.000169965 |
| FMO5          | -1.549231158 | 8.849806729 | 0.000172056 |
| RAG1AP1       | 0.336923752  | 9.002300877 | 0.000172056 |
| CUTA          | -0.533931066 | 10.0877627  | 0.000173734 |
| 6430548M08RIK | 0.662801794  | 8.68312085  | 0.000174383 |
| 2310002J15RIK | 0.599000962  | 7.705219689 | 0.000176251 |
| ALDH3B1       | -0.939245964 | 9.140551132 | 0.000176251 |
| LOC100045882  | 1.509880099  | 10.18855355 | 0.000176251 |
| VPS28         | -0.606869024 | 12.7806143  | 0.000176251 |
| FOXQ1         | 1.580085786  | 9.35802728  | 0.000177877 |
| MORF4L1       | 0.607259722  | 9.904953463 | 0.000177969 |

|               |              |             |             |
|---------------|--------------|-------------|-------------|
| PRSS22        | 1.681414283  | 8.129964839 | 0.000177969 |
| DDX47         | 0.337071396  | 9.470216015 | 0.00017861  |
| ASAH3         | -1.038827787 | 8.257690769 | 0.000179041 |
| SIVA1         | 0.829046172  | 9.817116988 | 0.000179041 |
| TMEM176B      | 1.074767818  | 10.7127211  | 0.000180763 |
| ANGEL2        | -0.477115805 | 8.925216333 | 0.000181051 |
| 9530018I07RIK | -0.692079996 | 11.93762022 | 0.000182358 |
| ENPEP         | -0.387067991 | 7.811430267 | 0.000182358 |
| HKDC1         | -1.009015774 | 11.46435087 | 0.000182475 |
| SOX9          | 1.079818707  | 9.413954111 | 0.000183596 |
| CIRH1A        | 1.055387317  | 9.497096872 | 0.000184017 |
| RFFL          | 0.255860538  | 7.816153115 | 0.000184017 |
| UBE2D3        | -0.215322038 | 8.024284924 | 0.000184298 |
| CMAS          | 0.651842837  | 10.86208634 | 0.000184704 |
| CREB3L2       | -0.618424133 | 8.311914451 | 0.000186034 |
| 9430038I01RIK | -0.866063426 | 8.587973218 | 0.000186313 |
| CSNK1D        | 0.589581968  | 9.499699502 | 0.000186313 |
| D15MGI27      | 0.435913735  | 9.150588124 | 0.000186313 |
| NDUFS6        | -0.546405371 | 12.01028161 | 0.000186313 |
| DARC          | 0.803349756  | 7.98625161  | 0.000186828 |
| ACP2          | -0.359671641 | 8.433015092 | 0.000187559 |
| TTC19         | -0.357303255 | 8.239913792 | 0.000187559 |
| LOC100046741  | 0.8637449    | 8.890148505 | 0.000187623 |
| AGPAT1        | -0.317084749 | 8.170300532 | 0.000188918 |
| GCH1          | 1.899484835  | 9.926736307 | 0.000188918 |
| KLF2          | 0.745230607  | 8.207046935 | 0.000188918 |
| 2210015K02RIK | -0.93466735  | 9.634025676 | 0.000189344 |
| NACC2         | -0.464360481 | 9.233766975 | 0.000189344 |
| TMSB10        | 1.875674313  | 11.6294056  | 0.000189344 |
| SLC5A6        | -1.571553403 | 9.322633394 | 0.00019012  |
| EMCN          | 0.873166917  | 8.435503307 | 0.000190242 |
| C1QA          | 0.865156232  | 8.230800394 | 0.000192113 |
| MS4A10        | -1.525103123 | 13.79121044 | 0.000194769 |
| CTSW          | -0.465297253 | 8.065126413 | 0.000196035 |
| ALKBH7        | -0.565168788 | 8.790198538 | 0.000196816 |
| LOC100045981  | 0.535833336  | 8.27275685  | 0.000197831 |
| 1700088E04RIK | 0.203856976  | 7.842989298 | 0.000198243 |
| TTC22         | -0.724158785 | 9.453848106 | 0.000199969 |
| GTSE1         | 0.518006531  | 8.074882213 | 0.000201669 |
| 2410018C17RIK | 0.532556532  | 9.962174802 | 0.000203306 |
| PLD4          | 0.460073828  | 7.855643392 | 0.000203476 |
| TNC           | 0.540448062  | 7.93693057  | 0.000203725 |
| LRP4          | -0.630018085 | 8.304527323 | 0.000203847 |
| SPP1          | 0.759035545  | 7.75836068  | 0.000203847 |
| SEC16B        | -0.801777124 | 8.866278701 | 0.000203979 |
| H2-TW3        | -0.547293853 | 7.978240748 | 0.000205326 |
| MTMR11        | -0.323171297 | 8.359622319 | 0.000208186 |
| LOC100044696  | -0.311514052 | 8.040894939 | 0.000210527 |
| 4930570C03RIK | 0.500638665  | 8.368242814 | 0.000211622 |
| SH3GL2        | -0.667479364 | 8.526224546 | 0.000217173 |
| 2600005C20RIK | 0.676701002  | 8.905760948 | 0.000218474 |
| CX3CL1        | -1.062724437 | 9.643642487 | 0.000218474 |
| GALT          | -0.452761179 | 9.344722241 | 0.000218474 |
| RALGPS2       | 0.337599891  | 8.58527939  | 0.000218474 |
| AK3           | -0.997032171 | 10.40685086 | 0.000220227 |
| AKR1E1        | -0.451981135 | 7.94809052  | 0.000220227 |
| NBL1          | 0.868083534  | 8.966316599 | 0.000220227 |
| UQCRH         | -0.632676434 | 13.31540861 | 0.00022126  |

|                 |              |             |             |
|-----------------|--------------|-------------|-------------|
| AI481316        | 0.642193963  | 10.26233798 | 0.000222249 |
| AP1S1           | 0.415052138  | 8.614896679 | 0.000222249 |
| STX1A           | 0.525583295  | 7.98176445  | 0.000222249 |
| A730017D01RIK   | 0.557218344  | 7.820716259 | 0.000222276 |
| PCBD2           | -0.707019864 | 9.299240314 | 0.000222276 |
| TPM4            | 0.865254328  | 9.401150175 | 0.000222276 |
| SYNPO           | -1.185248711 | 10.28544557 | 0.000223368 |
| D430028G21RIK   | -0.735258183 | 8.389482283 | 0.000224745 |
| 1700007E06RIK   | -0.693128886 | 8.05646498  | 0.000224912 |
| ITPRIP          | 0.349047082  | 7.852105168 | 0.000224973 |
| PLXND1          | 0.385414557  | 7.839182762 | 0.000224973 |
| ADRB2           | 0.319460429  | 7.806577869 | 0.000229072 |
| EDG5            | 0.347253369  | 8.014802945 | 0.000229471 |
| CLEC2E          | -1.788112399 | 11.11136167 | 0.000229548 |
| LOC381019       | -1.928648001 | 9.497446553 | 0.000230551 |
| ICAM1           | 0.352549441  | 7.954826729 | 0.000230935 |
| TREH            | -3.260426803 | 11.39021341 | 0.000231611 |
| SERTAD1         | 0.433279169  | 9.327716048 | 0.00023319  |
| RAP1B           | 0.681867947  | 11.66047592 | 0.000234879 |
| RRP9            | 0.357905879  | 8.356316691 | 0.000234879 |
| 2600011E07RIK   | 0.331359996  | 7.654536318 | 0.000235922 |
| MCOLN2          | -0.395217272 | 7.948972361 | 0.000236869 |
| ZCCHC8          | -0.3586122   | 8.622497094 | 0.000237935 |
| CXCL1           | 1.789823795  | 8.568321058 | 0.00023851  |
| DLST            | -0.792498315 | 11.05035036 | 0.000238909 |
| IGSF11          | 0.369038624  | 7.667490321 | 0.000239094 |
| GSTZ1           | -0.819141138 | 9.353806908 | 0.000241395 |
| NOL14           | 0.274563387  | 8.106047982 | 0.000242415 |
| RHOT2           | -0.429652325 | 8.781832418 | 0.000242604 |
| ZFAND2A         | 1.597979535  | 10.48607598 | 0.000243119 |
| TSPAN1          | 0.603411909  | 7.915149785 | 0.000243736 |
| NAV1            | 0.612356747  | 8.157881203 | 0.000243837 |
| TCEA3           | -1.821224321 | 9.362384245 | 0.000243837 |
| CACNA1D         | -0.996339193 | 8.560999141 | 0.000244641 |
| COVA1           | -0.326943989 | 8.085077461 | 0.000244641 |
| MFSD7A          | -0.276965374 | 7.919430907 | 0.000245067 |
| EDNRB           | 1.357869121  | 8.946234602 | 0.000246046 |
| LYPD6B          | 0.253913167  | 7.693232713 | 0.000246908 |
| SLC30A5         | -0.789350081 | 10.29033978 | 0.000250631 |
| TNFSF12-TNFSF13 | -0.943028933 | 9.480753856 | 0.000251502 |
| LUZP1           | -0.709653937 | 9.953606761 | 0.000252375 |
| 3110057O12RIK   | -0.298573311 | 7.828034036 | 0.000254371 |
| ATP5L           | -0.31377549  | 12.61407392 | 0.000254371 |
| BTD             | -0.317344705 | 7.846943581 | 0.000254371 |
| D330008I21RIK   | -0.288622768 | 8.184872091 | 0.000254371 |
| FARP2           | -0.952263237 | 9.702322254 | 0.000254371 |
| PKD2            | 0.214699312  | 7.763498724 | 0.000254371 |
| SLC5A9          | -0.981588009 | 8.349381879 | 0.000254371 |
| 6230425C21RIK   | 0.201197359  | 7.73322025  | 0.000257434 |
| A230106J09RIK   | -1.301226466 | 8.612882067 | 0.000257434 |
| IGSF3           | -0.795875508 | 9.296790523 | 0.000257434 |
| KCTD17          | 0.365074038  | 7.828588394 | 0.000257434 |
| LOC100038894    | 0.246664886  | 7.644474463 | 0.000257434 |
| S100A1          | 0.830593386  | 9.611411294 | 0.000257434 |
| TMEM180         | 0.345351897  | 8.062486079 | 0.00025751  |
| SFRS9           | 0.473048211  | 9.766998186 | 0.000258248 |
| CARKD           | -0.444442596 | 9.829437681 | 0.000259921 |
| SPRR2I          | 0.180348182  | 7.532295312 | 0.000259921 |

|               |              |             |             |
|---------------|--------------|-------------|-------------|
| STARD4        | -1.006254879 | 10.92862245 | 0.000259921 |
| TRIM31        | -0.959638492 | 11.0984392  | 0.000259921 |
| CYP2D10       | -1.056406183 | 8.509156539 | 0.000260948 |
| ALDH16A1      | -0.53014763  | 8.947013763 | 0.000261318 |
| SYT8          | 0.650726615  | 7.772752796 | 0.000261318 |
| NGFRAP1       | 0.749862051  | 9.394992605 | 0.000262112 |
| NFYB          | 0.393762067  | 9.177724415 | 0.000266461 |
| EMP2          | 0.886043639  | 8.098985469 | 0.000266597 |
| SLC31A1       | -1.233966327 | 9.631181992 | 0.00026701  |
| CCDC25        | -0.325113837 | 7.971352278 | 0.00026866  |
| SLC15A3       | 0.597587286  | 7.92562835  | 0.00026866  |
| CD200         | 0.871217452  | 8.173850927 | 0.000274933 |
| GPLD1         | -0.305221683 | 8.179289214 | 0.000274933 |
| GTF2F1        | 0.346362408  | 9.020522466 | 0.000274933 |
| LOC677448     | 0.617889091  | 9.155389864 | 0.000277905 |
| ANXA10        | 0.802748291  | 7.721349029 | 0.000278605 |
| LOC100047934  | 2.69919524   | 10.95061566 | 0.000278729 |
| SNX2          | 0.432419664  | 9.850078363 | 0.000278729 |
| 9930020B22RIK | 0.465917752  | 7.640344739 | 0.000280251 |
| ACOT11        | -0.743349489 | 8.68826084  | 0.000280251 |
| ETFB          | -0.651573705 | 11.05107357 | 0.000280251 |
| TM4SF5        | -1.526900554 | 11.55974505 | 0.000280602 |
| NFKBIL2       | -0.516220305 | 8.20055183  | 0.000283382 |
| TMEM16J       | -0.965283644 | 10.30007278 | 0.000283382 |
| CRHBP         | 0.194566966  | 7.567106265 | 0.000285089 |
| UGT2B34       | -0.603968466 | 7.996963028 | 0.000285157 |
| 2310014H01RIK | 0.966964449  | 9.1713328   | 0.000285346 |
| ANKMY2        | -0.665511528 | 9.35473997  | 0.000285346 |
| ZWINT         | 0.918172479  | 9.233626026 | 0.000285346 |
| RORC          | -0.864440404 | 8.209396126 | 0.000286457 |
| THSD4         | 0.289982497  | 7.842193175 | 0.000286769 |
| ATP5C1        | -0.906947049 | 12.93678232 | 0.000287906 |
| DUSP10        | 0.297655878  | 7.867962147 | 0.000287906 |
| BC017158      | -0.408015852 | 8.153873495 | 0.000289317 |
| 2010001F03RIK | -0.229007013 | 7.864880485 | 0.000291742 |
| 1200016B10RIK | -0.405626463 | 8.660213722 | 0.000294785 |
| FIBP          | -0.538732606 | 10.2879977  | 0.000296367 |
| PTER          | -0.458145597 | 8.582887729 | 0.000299199 |
| TFAM          | -0.373767868 | 8.407366711 | 0.000299429 |
| GATA5         | -0.861089099 | 8.729332426 | 0.000301443 |
| DQX1          | -0.427646609 | 8.108593148 | 0.000303071 |
| DNAJB12       | -0.38087211  | 8.364837013 | 0.000303861 |
| CPS1          | -1.828776356 | 9.186986159 | 0.000304394 |
| AQP11         | -0.88168677  | 9.109720573 | 0.000304799 |
| DERA          | -0.505798026 | 8.46035948  | 0.000304922 |
| SEC24C        | -0.472630514 | 10.48403859 | 0.000305414 |
| PSG25         | 0.232531673  | 7.633721873 | 0.00030599  |
| SPATA2L       | -0.207231714 | 7.821531687 | 0.000306121 |
| OLFML3        | 0.494384873  | 7.995186313 | 0.000306279 |
| RRAGD         | -0.956436767 | 8.683414571 | 0.000306353 |
| ZFP260        | -0.397712202 | 8.66089039  | 0.000306353 |
| 9430023L20RIK | 0.47637968   | 9.338451043 | 0.000307423 |
| ETL4          | -0.602078329 | 9.039912402 | 0.00030846  |
| CHN2          | -0.361128718 | 8.917934333 | 0.000309129 |
| 2010308M01RIK | -0.269628313 | 8.006970529 | 0.000309511 |
| LGALS1        | 1.155364458  | 9.403886829 | 0.000311501 |
| TNFSF9        | 0.1778189    | 7.657171314 | 0.000311991 |
| 8430410A17RIK | 0.33562917   | 7.956000718 | 0.000312239 |

|                 |              |             |             |
|-----------------|--------------|-------------|-------------|
| ETS1            | 0.343923092  | 7.876958167 | 0.000312239 |
| POLD1           | -0.417320575 | 8.568766756 | 0.000312517 |
| NKX2-3          | 0.810002034  | 8.567467645 | 0.000313884 |
| TMEM167         | -0.452751524 | 8.336646855 | 0.000314602 |
| HP              | 0.192191175  | 7.658024454 | 0.000314944 |
| BET1            | -0.413246542 | 7.963568442 | 0.000320393 |
| OXCT2A          | 0.210137961  | 7.623029891 | 0.000322586 |
| ESAM            | 1.245428027  | 9.060364818 | 0.00032362  |
| SENP3           | 0.537231159  | 9.419182044 | 0.00032362  |
| TRMT2B          | -0.195919653 | 7.793023542 | 0.00032362  |
| LOC100048613    | -0.448407016 | 13.16339268 | 0.000324647 |
| SYTL3           | -0.199239629 | 7.709135456 | 0.000327529 |
| SNX13           | -0.504260314 | 8.851523509 | 0.00032813  |
| AKAP12          | 0.196579037  | 7.689850505 | 0.000328306 |
| SCL0001379.1_70 | 0.365641204  | 7.819685945 | 0.000328924 |
| 1300001I01RIK   | -0.450982126 | 8.627207913 | 0.000330768 |
| APOA1           | -0.860649367 | 15.73014914 | 0.000330768 |
| MAML2           | 0.367804577  | 7.941788665 | 0.000330768 |
| SERF2           | -0.772677946 | 12.41230855 | 0.000330768 |
| RNF144A         | 0.292667309  | 7.762330651 | 0.000331719 |
| EXTL3           | 0.270075362  | 8.537629608 | 0.000333061 |
| 2010003J03RIK   | -0.28638412  | 8.196104834 | 0.000334433 |
| TPBG            | 0.489608772  | 8.164081628 | 0.000335151 |
| ALDOA           | 0.918144403  | 11.32486756 | 0.000335547 |
| ENO3            | -0.632967043 | 8.085169334 | 0.000335547 |
| LY6G6E          | 0.243269064  | 7.595535416 | 0.000335547 |
| NQO2            | -0.627864099 | 8.707262018 | 0.000337867 |
| 1110006G06RIK   | -0.442827243 | 8.294429172 | 0.000338833 |
| PIGQ            | -0.399381918 | 8.698668198 | 0.000338833 |
| ASAH3L          | 1.077179704  | 8.630025346 | 0.000342662 |
| B230112P13RIK   | 0.386826612  | 7.874742444 | 0.000343376 |
| SLC37A4         | -0.521545437 | 7.917935277 | 0.000343376 |
| GSDMA1          | 0.306252152  | 7.61387303  | 0.000344601 |
| GUCA2B          | -1.242388281 | 15.14338789 | 0.000347414 |
| TTC7B           | 0.285546749  | 8.062564133 | 0.000347697 |
| 5530400K22RIK   | -0.276738967 | 8.342650048 | 0.000347771 |
| PSCD3           | 0.562928865  | 8.314669818 | 0.000347771 |
| PTRH1           | 0.933392012  | 8.591819746 | 0.000349664 |
| SPOP            | 0.522955743  | 11.03283001 | 0.000349762 |
| 2900026A02RIK   | -0.700731969 | 8.940823353 | 0.000350273 |
| RASA3           | 0.452853399  | 8.497124867 | 0.000350329 |
| PANK3           | -0.475196043 | 8.051544833 | 0.000353405 |
| 5830468K18RIK   | -0.308062171 | 7.990832106 | 0.00035343  |
| ARHGEF3         | 0.783949135  | 10.75628801 | 0.00035343  |
| C130090K23RIK   | 1.606601358  | 8.094350405 | 0.00035343  |
| TSPAN3          | -0.792785255 | 8.763903577 | 0.0003563   |
| 2310002L13RIK   | 0.210597111  | 7.542554735 | 0.00035829  |
| LOC100044204    | -0.93653456  | 8.364390511 | 0.000360033 |
| TYMP            | -0.304179642 | 7.858676006 | 0.000361331 |
| NFATC3          | -0.255127478 | 8.546133929 | 0.000361497 |
| SCL000490.1_983 | -0.31296095  | 8.508670073 | 0.000361497 |
| PECAM1          | 0.341287873  | 7.793818259 | 0.00036319  |
| 5033428B15RIK   | -0.587445342 | 8.114765681 | 0.000363745 |
| GAB1            | -0.976495221 | 8.725586052 | 0.000364083 |
| PTPRE           | 0.507162487  | 9.313419    | 0.000365193 |
| MAP3K3          | 0.411098471  | 8.592573004 | 0.000365658 |
| FGD6            | 1.361420123  | 9.112777278 | 0.000365918 |
| NCOR1           | -0.522648754 | 9.005983201 | 0.000365918 |



|               |              |             |             |
|---------------|--------------|-------------|-------------|
| TSC22D2       | 0.955887823  | 9.477028863 | 0.000365918 |
| GHRL          | 1.96664661   | 9.162312016 | 0.000366566 |
| RCSD1         | 0.3900669    | 8.033600199 | 0.00036684  |
| ARL2BP        | 0.427466986  | 8.317251884 | 0.000367029 |
| MBC2          | 0.498147417  | 8.184498217 | 0.000367534 |
| OLFM1         | 0.254668924  | 7.871093351 | 0.000367534 |
| SLC1A4        | 0.717139402  | 8.257161603 | 0.000367534 |
| SUPT3H        | 0.340785188  | 8.657064657 | 0.000368267 |
| UCHL3         | 0.754177147  | 8.538630642 | 0.000368267 |
| SH3BGRL3      | 1.158268868  | 10.72803447 | 0.000369867 |
| PEX5          | -0.289960185 | 8.321654237 | 0.000370597 |
| WBP1          | -0.374532197 | 8.387529367 | 0.000370597 |
| AI450540      | -0.935415654 | 9.63257202  | 0.000370767 |
| C630002C17RIK | 0.311090412  | 7.654915589 | 0.000370877 |
| ATP10D        | 0.673705986  | 8.107317131 | 0.000371353 |
| 4833426J09RIK | -0.970835129 | 8.992726182 | 0.00037835  |
| MRPS7         | 0.4110158    | 9.736258461 | 0.00037835  |
| PRIM2         | 0.915996014  | 8.01612485  | 0.000382422 |
| ATG9A         | -0.23912712  | 7.890719513 | 0.000382562 |
| HADHB         | -0.480857197 | 10.18994849 | 0.000391746 |
| ARHGEF19      | -0.714616339 | 8.279091221 | 0.00039311  |
| KRT19         | 0.955746065  | 11.30850045 | 0.000393878 |
| XPNPEP1       | -1.073730232 | 10.85185365 | 0.000396052 |
| PEX11A        | -0.777732685 | 9.941007798 | 0.000396086 |
| KLF9          | 0.896219503  | 10.13524201 | 0.000396218 |
| LOC100047619  | 1.059151272  | 9.082519604 | 0.000396218 |
| PRRG2         | -0.391418594 | 9.045874883 | 0.000396334 |
| EPHA2         | 0.987098333  | 8.626683605 | 0.000398171 |
| NRARP         | -0.645728717 | 8.276108274 | 0.000398171 |
| TRIP6         | 0.285714963  | 7.792343202 | 0.000400338 |
| UBE4B         | -0.714723382 | 9.795806346 | 0.000405032 |
| RNF167        | -0.765014668 | 8.372608431 | 0.000407262 |
| TYK2          | -0.274483395 | 8.392219346 | 0.0004073   |
| CD97          | 0.54789782   | 7.945797503 | 0.000409945 |
| MFSD7B        | -2.127884607 | 10.78581564 | 0.000409945 |
| MFSD9         | -0.476323751 | 8.466801303 | 0.000409945 |
| APG5L         | -0.345167045 | 8.458051385 | 0.000410179 |
| MRPS15        | -0.206577904 | 7.861800174 | 0.000410179 |
| GANC          | -0.593221474 | 8.590513182 | 0.00041133  |
| STARD8        | 0.228718923  | 7.803793348 | 0.000411683 |
| CBX8          | -0.278927853 | 7.806301854 | 0.000414835 |
| 1500005N04RIK | 0.578753396  | 8.365000454 | 0.000416127 |
| APOC1         | 0.226053994  | 7.622453384 | 0.000416127 |
| ARPC3         | 0.511406926  | 10.7221405  | 0.000416127 |
| JDP2          | 0.370529355  | 7.875343459 | 0.000416127 |
| LOC384206     | -0.8444169   | 12.80953351 | 0.000416127 |
| SLC17A4       | -0.650139647 | 8.039896032 | 0.000416127 |
| TINAGL        | 0.510076417  | 8.07595605  | 0.000416127 |
| CTNNBIP1      | -0.616878489 | 8.564683954 | 0.000416815 |
| 1110029I05RIK | -0.674130484 | 8.335102349 | 0.000419749 |
| DICER1        | -0.223890261 | 8.043050245 | 0.000419749 |
| RFC2          | -0.269017084 | 8.975540213 | 0.000421079 |
| AI875142      | -0.816304866 | 10.15575226 | 0.000425335 |
| CD160         | -0.3660839   | 7.95422769  | 0.000425335 |
| SPRR2G        | 1.153113484  | 7.811691852 | 0.000425335 |
| OBFC2B        | -0.195041735 | 8.556246471 | 0.000425404 |
| DHRS7         | 0.550260187  | 8.803458469 | 0.000429447 |
| ATXN10        | 0.265123569  | 7.818508953 | 0.000434729 |

|               |              |             |             |
|---------------|--------------|-------------|-------------|
| AAAS          | 0.265526528  | 8.062146809 | 0.000435397 |
| MYH9          | 0.32561924   | 9.822378215 | 0.000438662 |
| DNAJB6        | 0.206179976  | 8.4712529   | 0.000439558 |
| CBWD1         | 0.536452569  | 8.3026311   | 0.000441995 |
| PAPSS1        | -0.972287482 | 9.225621298 | 0.000442016 |
| HSPB1         | 0.475505022  | 8.277417473 | 0.000443376 |
| MRPL14        | -0.395963222 | 10.54914298 | 0.000452485 |
| SULT1A1       | 1.034834213  | 8.339335399 | 0.000452485 |
| THRA          | -0.337036128 | 7.878525478 | 0.000452485 |
| TMCO4         | -0.583038358 | 8.559421579 | 0.000452485 |
| LOC381212     | -0.260916369 | 8.082144551 | 0.000454401 |
| PPAP2B        | 1.815115326  | 10.41405386 | 0.000456493 |
| CLDN2         | 2.033705399  | 10.14744151 | 0.000460363 |
| AP3S2         | -0.169481207 | 7.88196148  | 0.000461313 |
| MGL2          | 0.265160879  | 7.732814444 | 0.000461313 |
| MMP7          | 0.544150342  | 7.776107274 | 0.000461313 |
| SLCO2B1       | -0.902880536 | 9.070783407 | 0.000462044 |
| PDGFRB        | 0.379194079  | 7.807696737 | 0.000462422 |
| KBTBD2        | 0.209117788  | 8.539294721 | 0.000462758 |
| ZFP12         | 0.411207745  | 8.247200254 | 0.00046486  |
| LOC100045697  | -0.380507821 | 11.12142118 | 0.000465564 |
| TMED9         | 0.793353275  | 10.10774339 | 0.000465828 |
| IL24          | 0.204663967  | 7.60886469  | 0.000465839 |
| PYCARD        | -0.709578946 | 8.004716387 | 0.000465839 |
| RRP1B         | 0.490459778  | 8.288542186 | 0.000468947 |
| RBX1          | 0.482721017  | 10.8334808  | 0.000469766 |
| ENPP7         | -1.26084191  | 8.296503737 | 0.000472973 |
| E230027M02RIK | -0.245805232 | 7.607581704 | 0.000474096 |
| EPN2          | 0.309094724  | 7.868085908 | 0.000475096 |
| NDUFA11       | -0.512712761 | 10.74889857 | 0.000475525 |
| 4930572J05RIK | 0.767082607  | 8.57781735  | 0.000475623 |
| CCDC86        | 0.956102968  | 9.514986916 | 0.000475623 |
| MAGED1        | 0.735899988  | 9.623917688 | 0.000475623 |
| RIN2          | 0.344337737  | 8.244911624 | 0.000475732 |
| TBK1          | -0.649729218 | 11.29054602 | 0.000475882 |
| MUPCDH        | -1.255121719 | 14.90620253 | 0.000478099 |
| GPR160        | -1.236391229 | 9.052034773 | 0.000478398 |
| CASP7         | -1.117720763 | 9.602684447 | 0.000479649 |
| CGREF1        | -0.320889284 | 7.976593959 | 0.00048     |
| S100A16       | 0.421711881  | 8.066414873 | 0.000480074 |
| LOC234987     | 0.548238242  | 9.23460273  | 0.000480434 |
| KLRA17        | 0.548658811  | 7.922719033 | 0.000480551 |
| ANAPC13       | -1.066394443 | 10.58583845 | 0.000482575 |
| BICD2         | 0.381114893  | 8.314811709 | 0.000484613 |
| FCGR3         | 1.161892367  | 8.182944507 | 0.000486094 |
| 2610024E20RIK | -0.838795889 | 10.23534074 | 0.000486153 |
| CLIC6         | -0.92759974  | 8.786047172 | 0.000486153 |
| NDOR1         | -0.221396079 | 8.003658135 | 0.000486153 |
| ALDH18A1      | -0.943500779 | 9.086525486 | 0.000487021 |
| EHHADH        | -0.294376329 | 7.786722506 | 0.000487299 |
| TAF9B         | 0.230766874  | 7.972497299 | 0.000487299 |
| WDR51B        | 0.382108707  | 8.321924425 | 0.000487299 |
| GPR155        | -0.736889806 | 8.093644695 | 0.000490363 |
| DDRGK1        | -0.373259703 | 10.46864581 | 0.000491923 |
| PRODH2        | -1.27573933  | 8.423512883 | 0.000493911 |
| SOCS6         | 0.357216837  | 7.972879363 | 0.000495399 |
| 1810008A18RIK | -0.397165859 | 8.995021473 | 0.000495449 |
| OSBPL2        | 0.351645271  | 8.864777248 | 0.000497034 |

|               |              |             |             |
|---------------|--------------|-------------|-------------|
| 1700029G01RIK | -1.079103688 | 9.361435391 | 0.000497435 |
| BOLA2         | 0.460570529  | 9.872519791 | 0.000497435 |
| CHUK          | -0.431762946 | 9.102952113 | 0.00049763  |
| TOX           | 0.355611854  | 8.065250534 | 0.000497779 |
| PPP1R9B       | 0.43169587   | 8.459877792 | 0.000498198 |
| SCG5          | 0.52399309   | 8.158364765 | 0.000500022 |
| MAFG          | 0.716153402  | 9.239114921 | 0.000501085 |
| 2810403A07RIK | 0.570617215  | 9.824786342 | 0.000501912 |
| MRPL52        | 0.647116781  | 10.31906974 | 0.000503311 |
| GGT1          | -1.201461964 | 8.805826615 | 0.000504467 |
| APOB48R       | 0.189617796  | 7.688241017 | 0.000505011 |
| PLA2G2A       | 2.293157754  | 9.401863998 | 0.000505011 |
| SLC1A1        | -1.00463187  | 8.321938052 | 0.000505011 |
| 1810031K17RIK | 0.192006892  | 7.783636901 | 0.000508187 |
| 1700108L22RIK | -0.655074041 | 8.99653453  | 0.000508717 |
| PIGR          | -1.88835918  | 9.823969705 | 0.000509496 |
| APPBP2        | 0.815137456  | 10.36798102 | 0.000511032 |
| OMP           | 0.271831815  | 7.747974121 | 0.00051334  |
| B230343A10RIK | 0.327586123  | 7.921566721 | 0.00051337  |
| SLC40A1       | 1.400062472  | 8.575184686 | 0.000515739 |
| SNHG10        | 0.424873224  | 8.434773018 | 0.000515739 |
| EPHB2         | 0.253685498  | 7.983652973 | 0.000518123 |
| FBXO42        | -0.207340454 | 8.027659486 | 0.000518123 |
| SQSTM1        | 1.02669532   | 10.06947898 | 0.000518123 |
| PLEKHG6       | -0.757746915 | 8.553949346 | 0.000521498 |
| IL10RB        | -0.464856561 | 8.431230758 | 0.000523702 |
| FOXA1         | 0.84033143   | 8.413135314 | 0.000525039 |
| UNC13D        | 0.201160461  | 7.697460996 | 0.000528862 |
| ZFP655        | -0.254687307 | 8.021194633 | 0.000529682 |
| LRBA          | -0.405803084 | 8.879100209 | 0.000532654 |
| 9530081N05RIK | 0.235681603  | 7.586606734 | 0.000533912 |
| 2210013O21RIK | 0.762633661  | 9.514593338 | 0.000537439 |
| CDX1          | -0.700143302 | 9.151431587 | 0.000537439 |
| CRIP2         | 1.802597868  | 9.391406534 | 0.000538598 |
| B4GALT3       | 0.875939065  | 9.468190062 | 0.000539662 |
| TMEM41A       | -0.803194076 | 11.47683028 | 0.000539662 |
| TUBA6         | 0.572950955  | 11.37497642 | 0.000540371 |
| 0610030P10RIK | 1.273771423  | 8.199611372 | 0.000540632 |
| 6030400N17RIK | -0.57654484  | 8.227330246 | 0.000540632 |
| ZZEF1         | -0.658652002 | 9.454640528 | 0.000540632 |
| FGF10         | 0.248591087  | 7.65145643  | 0.000541709 |
| 4732456N10RIK | 1.141054423  | 7.83802623  | 0.000542516 |
| LYNX1         | 0.473810896  | 7.804854165 | 0.000543458 |
| PRKCZ         | -0.841456201 | 8.510998811 | 0.000543458 |
| NT5C          | -0.525915234 | 10.65183375 | 0.000544303 |
| TINAG         | -0.737891003 | 8.479474823 | 0.000544303 |
| PHLDA3        | 0.714895531  | 7.879117423 | 0.000544593 |
| PLCL2         | -0.599284463 | 8.822354687 | 0.000544795 |
| EIF5          | 0.72251732   | 11.05452212 | 0.000545928 |
| RIOK3         | 0.751200439  | 10.87198784 | 0.000546656 |
| SPRR2F        | 1.816968933  | 7.987808296 | 0.000546656 |
| ADH4          | -0.858131436 | 8.034394714 | 0.000548056 |
| ARHGAP27      | 0.604003574  | 8.752430571 | 0.000548056 |
| USH1C         | -0.784939984 | 11.20751459 | 0.000556075 |
| WWTR1         | 0.210410524  | 7.900406543 | 0.000557043 |
| ICK           | 1.058153143  | 9.839030036 | 0.000559816 |
| ESPN          | -1.651747541 | 10.64458279 | 0.000563412 |
| C730026J16    | 0.459115974  | 9.281009153 | 0.000566399 |

|               |        |              |             |             |
|---------------|--------|--------------|-------------|-------------|
| POLR2J        |        | -0.624205692 | 10.23912021 | 0.000566399 |
| LOC100041797  |        | 0.429455278  | 8.311486363 | 0.000567709 |
| LYZ           |        | 0.79895539   | 15.32142413 | 0.000567863 |
| NR2F6         |        | -0.430390365 | 9.322144372 | 0.000567863 |
| LPCAT4        |        | 0.893501971  | 8.363697636 | 0.000571958 |
| GPATCH2       |        | -0.687183927 | 8.86187242  | 0.000572089 |
| LOC100044566  |        | -0.49906999  | 8.71783943  | 0.000572089 |
| FBP2          |        | -0.364560202 | 12.54189518 | 0.00057253  |
| ALDH1A1       |        | -1.872983663 | 9.51740374  | 0.000572543 |
| KRT1-5        |        | 0.226101228  | 7.642870181 | 0.000572543 |
| SUV39H1       |        | 1.234376341  | 8.126193113 | 0.000576306 |
| LOC621823     |        | -0.647731765 | 8.964399175 | 0.00057631  |
| UBE2O         |        | 0.780592933  | 9.477150923 | 0.000582719 |
| QRSL1         |        | -0.353923037 | 8.747910229 | 0.000582859 |
| LOC100047579  |        | -1.249434853 | 10.55608517 | 0.000586622 |
| 1190002H23RIK |        | 0.984409044  | 8.530891664 | 0.000587336 |
| ASXL1         |        | 0.1873601    | 8.016174471 | 0.000587336 |
| PLAU          |        | 0.984342014  | 8.326194837 | 0.000587336 |
| SLC17A6       |        | 0.257164612  | 7.68005401  | 0.000587998 |
|               | Mar-08 | -0.43757683  | 8.215865862 | 0.00059195  |
| ACO1          |        | -0.463435674 | 8.187346039 | 0.000599028 |
| ZFAND6        |        | -0.396456498 | 8.889962655 | 0.000599028 |
| BET1L         |        | 0.404711125  | 9.501764743 | 0.000602803 |
| PREP          |        | 0.326913842  | 8.548037548 | 0.000607884 |
| GOLGA4        |        | -0.221730102 | 8.130842688 | 0.000611221 |
| HIC1          |        | 0.275826823  | 7.727804863 | 0.000611445 |
| ACAA1B        |        | -1.003168787 | 8.227658873 | 0.000614494 |
| 2210419D22RIK |        | -0.455222512 | 9.367328988 | 0.000614579 |
| 1110012D08RIK |        | 0.330693269  | 8.125976848 | 0.000615292 |
| 1190008K20RIK |        | -0.427566128 | 8.164789555 | 0.000615292 |
| AU014645      |        | 0.360547009  | 8.752038484 | 0.000615292 |
| EG433865      |        | 0.539890091  | 8.434388186 | 0.000615292 |
| GBF1          |        | -0.554918765 | 9.034024769 | 0.000615292 |
| HDC           |        | 0.771878466  | 8.00746021  | 0.000615292 |
| RUNX1         |        | 0.303960313  | 7.736964898 | 0.000615292 |
| MDH1          |        | -0.525596821 | 8.019318805 | 0.000618074 |
| TMEM59        |        | -0.826559892 | 10.38580329 | 0.000618074 |
| FAM132A       |        | -1.268983888 | 8.464411917 | 0.000620405 |
| ITGB6         |        | 1.207154242  | 9.339827403 | 0.000621616 |
| PRKAR1A       |        | 0.742453776  | 10.03441122 | 0.000621616 |
| NDUFB7        |        | -0.336340913 | 8.664563273 | 0.000626738 |
| PRL2C2        |        | 1.60660858   | 7.973591138 | 0.000629195 |
| 1810019J16RIK |        | -0.235949578 | 8.103517104 | 0.000631572 |
| MICAL1        |        | -0.957331108 | 8.93582276  | 0.000631572 |
| PIGO          |        | -0.243943346 | 8.419805077 | 0.000634648 |
| DEFKR21       |        | 1.508134906  | 8.760910246 | 0.000634958 |
| DEFKR-RS1     |        | 1.129964668  | 14.7545888  | 0.000634958 |
| E030027L17    |        | -0.198955368 | 7.836339572 | 0.000634958 |
| UNC93A        |        | -0.786984629 | 8.17983948  | 0.000634958 |
| ATPIF1        |        | -0.767927077 | 13.87272865 | 0.000637767 |
| 4632401N01RIK |        | 0.319705125  | 7.833995759 | 0.000640889 |
| GPR128        |        | -0.854545333 | 8.676297114 | 0.000640889 |
| POLR1A        |        | 0.363308476  | 8.582830065 | 0.000640889 |
| RALGPS1       |        | -0.290613934 | 7.814532784 | 0.000640889 |
| SERPINB1A     |        | 1.162656634  | 11.70437177 | 0.000640889 |
| DDX28         |        | 0.364530756  | 8.131462074 | 0.000646418 |
| LRP11         |        | 0.284112894  | 7.781202551 | 0.000646418 |
| TH1L          |        | -0.291840126 | 8.685137699 | 0.000646418 |

|                    |              |             |             |
|--------------------|--------------|-------------|-------------|
| SLC35C1            | 0.76212078   | 11.43015315 | 0.000647288 |
| SAT2               | -0.281097402 | 7.822383566 | 0.000648909 |
| B130018F13RIK      | -0.257682254 | 7.813800902 | 0.000649669 |
| 2310014D11RIK      | 0.517270547  | 7.960976267 | 0.000654686 |
| BC024659           | 0.20223723   | 7.901187446 | 0.000654686 |
| GUSB               | 0.909961437  | 8.767940541 | 0.000655566 |
| ECSIT              | -0.40635978  | 9.275621155 | 0.000655651 |
| 2700084L06RIK      | 0.322547136  | 8.185077611 | 0.000658043 |
| GNAI2              | 0.750098948  | 11.02582571 | 0.000664423 |
| HEXDC              | -0.525081601 | 8.083380287 | 0.000664423 |
| RABL3              | -0.355635035 | 8.353435277 | 0.000664423 |
| SH3PXD2B           | 0.734962962  | 8.032240798 | 0.000664423 |
| TMEM185B           | 0.279385699  | 9.630958197 | 0.000664423 |
| CSNK2A2            | 0.45055071   | 9.680300548 | 0.000666781 |
| 3300005D01RIK      | 0.79984716   | 8.275128063 | 0.000670264 |
| 9030024J15RIK      | 1.205557002  | 8.972625104 | 0.000670524 |
| CIDEB              | -0.79772778  | 11.36679076 | 0.000672372 |
| PAK2               | 0.272061134  | 7.951666338 | 0.000677258 |
| STX5A              | -0.399527345 | 10.87532808 | 0.000677364 |
| YBX3               | 1.851962575  | 11.15016285 | 0.000678495 |
| IVD                | -0.212819686 | 7.814481475 | 0.000678544 |
| KLF6               | 1.121847348  | 11.99859235 | 0.000683009 |
| GLP2R              | 0.491990475  | 7.763620419 | 0.000694063 |
| A730027E01RIK      | -0.316390512 | 7.837861584 | 0.000694737 |
| TACR1              | 0.371703087  | 7.783735077 | 0.000694737 |
| TAOK1              | 0.22076357   | 8.878987716 | 0.000696671 |
| PTPRF              | -0.260456403 | 7.845494838 | 0.000696817 |
| CCNO               | 0.197109482  | 7.594778956 | 0.000697817 |
| HBEGF              | 0.869395926  | 8.864320589 | 0.000697817 |
| RGS2               | 0.155068719  | 7.642932579 | 0.000699054 |
| ARHGAP18           | -0.557447277 | 9.396674767 | 0.000699875 |
| ACADM              | -1.181915936 | 10.90721801 | 0.000702837 |
| MALL               | -0.604617281 | 10.97009817 | 0.000703152 |
| C030027H14RIK      | 0.590853501  | 7.943530852 | 0.000703322 |
| 6430590I03RIK      | 0.263182438  | 7.853711308 | 0.000703352 |
| A630098G22RIK      | -0.284941821 | 7.759580282 | 0.000703352 |
| D630032F02         | -0.532866742 | 7.995298882 | 0.000703474 |
| CXCL2              | 0.25376588   | 7.560600426 | 0.000704917 |
| TMEM139            | -0.901083822 | 8.669843707 | 0.000705662 |
| SLC2A9             | -0.328726368 | 7.908288779 | 0.000709216 |
| COQ7               | -0.459550344 | 8.536607782 | 0.000713462 |
| CPT2               | -0.669392938 | 11.17254482 | 0.000713462 |
| GOSR1              | -0.339895162 | 8.293264969 | 0.000713947 |
| IL6RA              | 0.147833215  | 7.726334321 | 0.00071402  |
| IGBP1              | -0.278248566 | 8.372688319 | 0.000714754 |
| CD177              | 0.444951935  | 7.743406773 | 0.000715323 |
| ENSMUSG00000074075 | 0.884517322  | 10.99724826 | 0.000715323 |
| ARPP19             | -0.395019736 | 8.554124794 | 0.00072124  |
| MEOX1              | 0.189196243  | 7.583582706 | 0.000723518 |
| TFG                | -1.008164359 | 10.51366736 | 0.00072529  |
| 1700052O22RIK      | 0.789579085  | 8.91074985  | 0.00072678  |
| C1QC               | 1.162574468  | 8.289691317 | 0.00072678  |
| SEC15L1            | -0.47033872  | 8.429494906 | 0.000728095 |
| 0610030E20RIK      | -0.213855813 | 8.091777783 | 0.000728771 |
| TRMT2A             | 0.172037307  | 8.395924123 | 0.000728771 |
| MAK16              | 0.406663812  | 8.375829943 | 0.000732127 |
| RAB11FIP5          | 0.40503669   | 7.771052609 | 0.000737482 |
| TOPORS             | 0.316626989  | 8.778013676 | 0.000738254 |

|               |              |             |             |
|---------------|--------------|-------------|-------------|
| 9630058J23RIK | -0.270447341 | 8.545632734 | 0.00073845  |
| LPCAT3        | -0.589687873 | 10.66412167 | 0.000740476 |
| MYO7B         | -0.208716612 | 7.882195625 | 0.000741917 |
| LOC100046895  | 0.293224983  | 7.828058441 | 0.000742086 |
| SLC5A4A       | -1.087785996 | 8.156844098 | 0.000742561 |
| TNFRSF1B      | 0.121363066  | 7.615599104 | 0.000742561 |
| COX7B         | -0.333510801 | 8.028615113 | 0.000744861 |
| GALNTL4       | 0.136271048  | 7.581931693 | 0.000744861 |
| NPTX2         | 0.454065343  | 7.876490629 | 0.000744861 |
| SKZ1-PENDING  | -0.230410622 | 7.812554527 | 0.000744861 |
| PIM3          | 1.093637635  | 10.20160747 | 0.000745387 |
| E430003H02RIK | -0.197039933 | 7.801822815 | 0.000752717 |
| E2F4          | -0.264964942 | 8.405689718 | 0.000760269 |
| IL10RA        | 0.195877826  | 7.692038204 | 0.0007621   |
| MMRN2         | 0.380333471  | 7.841793634 | 0.0007621   |
| SLC25A44      | -0.51094774  | 9.103330641 | 0.000767724 |
| HHEX          | 0.23614162   | 7.726004438 | 0.000768154 |
| 4732418C07RIK | -0.557816541 | 9.000721368 | 0.00076985  |
| EG269105      | -0.683369123 | 12.83527138 | 0.000770817 |
| MBOAT2        | 0.26147422   | 7.690687863 | 0.000770817 |
| TMEM181       | 0.326297339  | 8.152052433 | 0.00077413  |
| ARL11         | 0.422621925  | 7.728669095 | 0.000774255 |
| CAPN2         | 0.183274627  | 7.657739572 | 0.000778543 |
| BRE           | 0.201880109  | 8.446033499 | 0.000782392 |
| IER5L         | 0.409829018  | 7.904270939 | 0.000782596 |
| LOC100047863  | -0.35053989  | 8.435273857 | 0.000783268 |
| GSS           | 0.29534472   | 8.312419274 | 0.00078729  |
| SCML4         | -0.31450301  | 7.869459002 | 0.000788195 |
| C130074G19RIK | -0.473879653 | 9.090674007 | 0.000794006 |
| TBC1D15       | 0.741824967  | 9.922810116 | 0.000794006 |
| ITGA3         | 0.531523858  | 10.84937283 | 0.000798354 |
| PGRMC1        | -0.667540066 | 8.740876364 | 0.000800383 |
| 2310008H09RIK | 0.380652354  | 8.237327397 | 0.000801227 |
| PRKCBP1       | 0.433138497  | 9.187450048 | 0.000801227 |
| CTSE          | 1.071476768  | 7.967915543 | 0.000801669 |
| BC002199      | -0.553656606 | 10.14728931 | 0.000802859 |
| 4833439L19RIK | -0.27545156  | 8.56529044  | 0.000803166 |
| RHOJ          | 0.721327051  | 8.399408322 | 0.000804657 |
| SLC26A4       | 0.384062783  | 7.774189973 | 0.000805219 |
| LOC100039623  | -0.151021457 | 7.810334098 | 0.000807817 |
| NDUFA2        | -0.574877999 | 12.13908917 | 0.000809704 |
| TTC39B        | 0.576711976  | 8.492967132 | 0.000812129 |
| 9530048O09RIK | 0.191149189  | 7.637888639 | 0.000814868 |
| HMOX1         | 0.471221565  | 7.740196305 | 0.000814868 |
| CASKIN2       | -0.413217379 | 8.919653063 | 0.000814934 |
| TMEM141       | 0.371819825  | 8.342832094 | 0.000814934 |
| CDC42BPB      | 0.390271425  | 9.886349901 | 0.000816459 |
| BCL2A1B       | 1.337900289  | 8.744661171 | 0.000818755 |
| STEAP2        | 0.316435308  | 7.874668521 | 0.000822648 |
| RGS1          | 0.61175952   | 7.949784919 | 0.000824222 |
| MAF1          | -0.513356045 | 11.38256613 | 0.000825967 |
| PPIC          | 0.477769217  | 8.417833407 | 0.000831232 |
| D630014A15RIK | -0.598749154 | 8.690429263 | 0.000831952 |
| F2R           | 1.421143583  | 10.36504372 | 0.000833856 |
| LOC100046802  | 0.19104167   | 7.61494545  | 0.000836012 |
| 2810402K13RIK | 0.142284045  | 7.979624537 | 0.000838626 |
| SAP30L        | -0.846746312 | 11.26862501 | 0.000839502 |
| P2RY13        | 0.4821183    | 7.803926584 | 0.000839614 |

|                |              |             |             |
|----------------|--------------|-------------|-------------|
| PLA1A          | 0.241075507  | 7.741422279 | 0.000839697 |
| ZNRF1          | 0.213502461  | 7.700740635 | 0.000843652 |
| ELTD1          | 0.226223496  | 7.667100903 | 0.000846865 |
| P2RX1          | 0.376335958  | 7.833364963 | 0.000850832 |
| C330005L02RIK  | -0.172301426 | 7.655234561 | 0.000852061 |
| CTLA4          | 0.14752305   | 7.648027787 | 0.000852992 |
| BACH2          | -0.520074975 | 8.165278481 | 0.000856468 |
| NT5C2          | 0.164069924  | 7.702542548 | 0.000856468 |
| D19BWG1357E    | 0.746094129  | 10.94168862 | 0.000859646 |
| CAMK2D         | 0.191815826  | 7.80740984  | 0.000859697 |
| ARAF           | -0.211457108 | 8.810663443 | 0.000860554 |
| GRK5           | 0.173849322  | 7.664997044 | 0.000860554 |
| B930004C15RIK  | -0.337188211 | 8.048341461 | 0.000864469 |
| EG667977       | -0.620132021 | 9.054760283 | 0.000864469 |
| SPINK3         | -1.978971039 | 14.03530351 | 0.000864469 |
| 2610200G18RIK  | 0.204402969  | 7.649490353 | 0.000870096 |
| LAPTM5         | 1.33855508   | 10.7960264  | 0.000874153 |
| GPR107         | -0.636336471 | 9.189682478 | 0.000874476 |
| HABP4          | -0.198519033 | 7.721288021 | 0.000875941 |
| PRODH          | -0.680881591 | 8.670456349 | 0.000880083 |
| 2010004A03RIK  | 0.197973453  | 7.658637909 | 0.000880094 |
| NT5M           | -0.368264817 | 9.044556515 | 0.000884559 |
| ENSA           | -0.421513218 | 8.401305635 | 0.000885422 |
| COL5A1         | 0.936019308  | 8.600515198 | 0.000888928 |
| GCAP27         | 0.610771942  | 9.210410921 | 0.000889005 |
| 6430510M02RIK  | -0.525216778 | 8.376498518 | 0.000889964 |
| EG627299       | -0.560279363 | 9.34374597  | 0.000890592 |
| BTBD12         | -0.644679099 | 9.02992499  | 0.000891737 |
| DAK            | -1.436514631 | 10.71570965 | 0.000891737 |
| WAS            | 0.225611469  | 7.77288131  | 0.000891737 |
| PGAM2          | 0.38755229   | 7.764707183 | 0.00089518  |
| 9530068E07RIK  | 0.202499482  | 8.411587474 | 0.000900844 |
| ECHDC2         | -0.398843368 | 8.160591273 | 0.000905385 |
| SEMA3F         | 0.929661368  | 8.198149127 | 0.00091017  |
| STX12          | -0.959742029 | 9.259717568 | 0.000912554 |
| GLOD5          | -0.273694109 | 7.831793653 | 0.000915466 |
| PCDH7          | 0.156260364  | 7.642777415 | 0.000916499 |
| LOC100045005   | 0.456415651  | 8.138955398 | 0.000918333 |
| 5730453I16RIK  | 0.208083112  | 8.747726669 | 0.000922827 |
| SCL0001978.1_6 | 0.348930666  | 7.897873674 | 0.000922827 |
| LOC381302      | -1.154250956 | 10.14181531 | 0.000925755 |
| THYN1          | 0.468108047  | 10.49746334 | 0.000925755 |
| EPGN           | 0.879850636  | 8.136262062 | 0.000926349 |
| 5033413D16RIK  | 0.228285654  | 8.250914435 | 0.000926616 |
| LOC100045019   | 0.264219569  | 7.940243063 | 0.000926616 |
| ANKZF1         | -0.308895443 | 8.254547235 | 0.000927924 |
| SNX24          | 0.776079354  | 8.785767702 | 0.000928972 |
| MAP2K3         | 0.584886085  | 11.24215193 | 0.000930682 |
| ASH2L          | -0.491058459 | 8.216435552 | 0.000933708 |
| MTPN           | 0.212691259  | 9.027827412 | 0.000933708 |
| TBX3           | -0.631384007 | 8.75611293  | 0.000939181 |
| IHPK1          | -0.670789988 | 9.758189712 | 0.000941265 |
| CYP2C65        | -1.325228786 | 8.637514345 | 0.000944029 |
| 1810013B01RIK  | -0.451538527 | 8.804119945 | 0.000944163 |
| CCDC56         | -0.6251193   | 10.66069468 | 0.000944163 |
| LOC100048056   | -0.173611237 | 7.743915804 | 0.000944163 |
| CSF1R          | 0.296590929  | 7.811907033 | 0.000946768 |
| ATL3           | 0.33970942   | 8.164265586 | 0.000946829 |

|               |              |             |             |
|---------------|--------------|-------------|-------------|
| CYP4F16       | -1.159712461 | 9.422283109 | 0.000946829 |
| MPP3          | 0.215262377  | 7.671903913 | 0.000946829 |
| TMEM38B       | 0.298319818  | 8.536273142 | 0.000946829 |
| VKORC1L1      | 1.133892908  | 9.283983893 | 0.000946829 |
| ZSWIM5        | -0.21356348  | 7.850157459 | 0.000948663 |
| DNMT3L        | 0.260004531  | 7.679132633 | 0.000950475 |
| POLR2F        | 0.637259659  | 10.36969477 | 0.000950475 |
| ACAD10        | -0.296417606 | 7.886285882 | 0.000954735 |
| CD151         | 0.343696054  | 10.84327975 | 0.00095489  |
| PCYT2         | -0.812829908 | 10.06004096 | 0.00095489  |
| ACCN2         | -0.231899578 | 7.747410583 | 0.00095524  |
| ARMC10        | 0.375125775  | 9.183931765 | 0.00095524  |
| C630022N07RIK | 0.492571433  | 8.767560399 | 0.00095524  |
| LDHD          | 0.504845108  | 7.698226291 | 0.00095524  |
| BCL2A1D       | 0.970903978  | 8.287579657 | 0.000957187 |
| A830007P12RIK | 0.204356665  | 8.482203767 | 0.000957241 |
| LCN7          | 0.206095634  | 7.599264202 | 0.000958927 |
| PGLYRP1       | 2.179753202  | 11.75904452 | 0.000958927 |
| SCIN          | -1.721383669 | 11.39803583 | 0.000959215 |
| DOCK4         | 0.138784978  | 7.620549404 | 0.000960564 |
| A330049M08RIK | 0.478224791  | 7.67943895  | 0.000960889 |
| 4933411K20RIK | -0.348289431 | 8.627447547 | 0.0009633   |
| ALKBH4        | -0.230700578 | 8.084033365 | 0.00096504  |
| LRRK1         | 0.408771172  | 8.241210954 | 0.000970139 |
| MLX           | -0.216762587 | 7.882830779 | 0.000970759 |
| RASEF         | 0.137637141  | 7.701371114 | 0.000971016 |
| SH3BGRL       | -0.319539687 | 8.237768469 | 0.000971016 |
| KRT27         | 0.526041714  | 7.773888085 | 0.000971464 |
| LGALS8        | -0.503505201 | 9.392557035 | 0.000972371 |
| ASNS          | 1.188577495  | 9.60537528  | 0.000972412 |
| FAHD2A        | -0.18961153  | 7.917949225 | 0.000972412 |
| PNPLA6        | -0.4054266   | 9.221319075 | 0.000972543 |
| SERPINA3N     | 2.697765881  | 9.80907085  | 0.00097396  |
| 1700072I22RIK | -0.365254418 | 7.902130045 | 0.000974328 |
| EPS8L2        | -0.610211093 | 10.22820594 | 0.000977889 |
| GLDC          | 0.129962554  | 7.567715059 | 0.000977889 |
| LOC100046898  | 0.468542414  | 9.707658998 | 0.00097864  |
| OVOL1         | -0.610252828 | 8.672593213 | 0.000978983 |
| 2810008M24RIK | 0.529676644  | 9.548670757 | 0.000981951 |
| SH3RF2        | -0.256607341 | 7.70077608  | 0.000982458 |
| HMHA1         | 0.270837445  | 7.748577794 | 0.000984584 |
| DSCR6         | 0.198772236  | 7.674549915 | 0.000986759 |
| MORC2A        | 0.358317093  | 8.985216161 | 0.000988263 |
| CLCN2         | -0.650585904 | 9.130874157 | 0.000990813 |
| KRBA1         | -0.588641284 | 8.032208059 | 0.000990813 |
| SNX8          | 0.607790312  | 8.628001365 | 0.000993598 |
| HOOK2         | -0.546497655 | 8.906148278 | 0.000994749 |
| NUDT7         | -0.50394494  | 8.32985608  | 0.000995892 |
| 2410018G20RIK | -0.461595998 | 9.237790918 | 0.000997756 |
| 2610035D17RIK | 0.186038776  | 7.806794793 | 0.000997756 |
| NR113         | -0.896439826 | 8.459342106 | 0.00100014  |
| BC020002      | 0.221269843  | 8.139276691 | 0.001002184 |
| LOC212399     | 0.627475261  | 8.343571561 | 0.001004023 |
| RET           | 0.266239984  | 7.82896101  | 0.001007287 |
| TRABD         | -0.221848662 | 8.355082009 | 0.001008241 |
| 1500005K14RIK | 0.506642135  | 8.442608166 | 0.00101113  |
| HOMER2        | -0.822068292 | 8.943611725 | 0.00101113  |
| DKFZP434J1813 | 0.452414505  | 7.955211875 | 0.00101531  |



|                 |              |             |             |
|-----------------|--------------|-------------|-------------|
| GSTA4           | 1.726731347  | 10.45390552 | 0.00101531  |
| LOC100047268    | 0.156169999  | 7.586001181 | 0.001022435 |
| CD276           | 0.239877964  | 7.728402353 | 0.001025063 |
| CHCHD10         | -0.699079399 | 12.45809355 | 0.001025466 |
| PHF13           | 0.250631694  | 8.295138086 | 0.001033487 |
| B230339M05RIK   | 0.338681442  | 8.846718018 | 0.001034275 |
| TGM1            | 0.538945666  | 7.749942494 | 0.001038295 |
| NRP1            | 0.544387775  | 8.366732662 | 0.001038735 |
| SST             | 1.475465863  | 10.75096749 | 0.001038735 |
| TRIO            | 0.287598779  | 8.534665937 | 0.001039026 |
| POLK            | 0.251375858  | 7.882178511 | 0.001043128 |
| RNPEPL1         | -0.573374719 | 12.05477377 | 0.001048448 |
| GM527           | 0.128587737  | 7.708794146 | 0.001048552 |
| RHBDF1          | 0.540569696  | 8.345428689 | 0.001050721 |
| NXT2            | -0.686158137 | 9.093078914 | 0.00105152  |
| 2310007B03RIK   | -0.833808154 | 8.504408741 | 0.001054339 |
| 9630015D15RIK   | -0.452400923 | 8.162692367 | 0.001054339 |
| CDC42EP5        | 0.546176111  | 9.966667408 | 0.001054339 |
| ERGIC2          | -0.280650737 | 8.352701642 | 0.001054339 |
| LOC669658       | -0.983899097 | 8.27491887  | 0.001054339 |
| MAP3K7IP1       | -0.374536337 | 8.605998636 | 0.001054339 |
| TMEM53          | -0.366098144 | 7.930124694 | 0.001054339 |
| TRIM15          | 1.600925603  | 10.00980995 | 0.001054339 |
| GCNT3           | 1.469794304  | 11.49752952 | 0.001057674 |
| LOC385019       | -0.316945172 | 7.871388666 | 0.001057674 |
| HCLS1           | 0.326329348  | 7.763801901 | 0.001063282 |
| HSP90AB1        | 0.546902833  | 10.61878737 | 0.001066878 |
| NDFIP1          | -0.380923814 | 10.25422641 | 0.00106751  |
| ZSWIM4          | 0.508287486  | 8.485370667 | 0.001069418 |
| PANK1           | -0.501065172 | 8.233485406 | 0.001069541 |
| PDK3            | -0.348862056 | 8.345630913 | 0.001069664 |
| TRIM41          | 0.306593236  | 8.99411501  | 0.001069664 |
| CHST4           | 1.118349981  | 8.84337032  | 0.001071839 |
| UNC45A          | 0.364956887  | 9.55901823  | 0.001076637 |
| BRIP1           | -0.246323844 | 7.883502598 | 0.001078585 |
| LOC100039011    | -0.191010165 | 7.840745349 | 0.001078733 |
| FKBP10          | 0.17899593   | 7.6849305   | 0.001079616 |
| ATP6V0D1        | 0.450702737  | 9.661591808 | 0.001083826 |
| MSLN            | 1.495053977  | 8.380084896 | 0.001084123 |
| ERBB2           | -0.67938351  | 9.178891262 | 0.001089254 |
| 2310079P03RIK   | 0.30538167   | 8.931781614 | 0.001091073 |
| DCUN1D5         | 0.518165839  | 8.930286705 | 0.001103813 |
| ARRDC4          | 1.3770279    | 9.685439324 | 0.001104118 |
| ITSN2           | 0.260068869  | 8.276848445 | 0.001104439 |
| TCEA2           | 0.201146733  | 7.838291305 | 0.001104964 |
| DNAJA2          | -0.179013179 | 7.843715172 | 0.001110556 |
| UACA            | -0.887610946 | 10.60612612 | 0.001111367 |
| CD14            | 1.053509367  | 8.367728723 | 0.001118312 |
| PNPO            | -0.493178332 | 8.364024904 | 0.001118611 |
| PRPS1           | 0.281916042  | 8.917538988 | 0.001119687 |
| ITGP            | 0.174175732  | 7.592862626 | 0.001121251 |
| SOX5            | 0.160843438  | 7.656312239 | 0.001124878 |
| RIMS3           | 0.215587382  | 7.712092546 | 0.001126874 |
| MAPKAP1         | -0.361986137 | 9.861110268 | 0.001137747 |
| TFDP2           | -0.281945339 | 7.931078785 | 0.001140785 |
| SCL0002069.1_48 | 0.154748239  | 7.625198559 | 0.001143958 |
| BDKRB1          | 0.154661085  | 7.628662091 | 0.00114869  |
| RXRA            | -0.170161803 | 7.841495326 | 0.001150146 |

|               |              |             |             |
|---------------|--------------|-------------|-------------|
| SERHL         | -0.3787963   | 8.049616705 | 0.001150923 |
| ABI2          | 0.230280992  | 7.914726698 | 0.001157851 |
| DMKN          | 0.790878976  | 8.386281423 | 0.001157851 |
| ZKSCAN14      | -0.402584685 | 8.139057408 | 0.001158317 |
| ZFP787        | -0.299166711 | 8.663847668 | 0.001159281 |
| BTBD6         | -0.506927512 | 8.776858466 | 0.001162682 |
| 5033414D02RIK | -1.23650093  | 10.38466484 | 0.001166945 |
| SLC41A3       | -0.219520241 | 7.797039042 | 0.00116883  |
| LOC100046003  | 0.323217163  | 9.14970327  | 0.001169289 |
| SF3B5         | 0.446482717  | 10.43055365 | 0.001172603 |
| SLC35B1       | -0.344568079 | 11.60399012 | 0.001172709 |
| NOL3          | 0.122137495  | 7.650727248 | 0.001174515 |
| WDR75         | 0.492429513  | 8.891877827 | 0.001176072 |
| EARS2         | -0.51346518  | 8.672084743 | 0.001179018 |
| ZCRB1         | 0.302008868  | 11.05453331 | 0.001179285 |
| PTK2          | 0.548700521  | 10.22642844 | 0.001179985 |
| IBTK          | 0.46378391   | 8.772757231 | 0.001180012 |
| USP52         | -0.385613573 | 8.311292605 | 0.001188401 |
| 2410014A08RIK | -0.210577721 | 7.862091849 | 0.001189074 |
| PI4KA         | -0.715467651 | 9.869193272 | 0.001189144 |
| RPRD1B        | -0.233427427 | 8.203779875 | 0.001189675 |
| SRPK2         | 0.15125913   | 7.653477908 | 0.001189675 |
| SPP2          | 0.203174972  | 7.667292116 | 0.001191343 |
| BC031781      | 0.389432206  | 8.945340625 | 0.001195252 |
| LOC100045967  | 0.860401227  | 10.57590793 | 0.001197565 |
| TIMP3         | 0.82379184   | 8.433561464 | 0.001197565 |
| NEO1          | 0.467619928  | 8.688373008 | 0.001202536 |
| X99384        | 0.269193513  | 7.688427593 | 0.001202536 |
| 1190005F20RIK | -0.789382411 | 8.827789646 | 0.001203139 |
| PABPC4        | 0.325000532  | 9.060665668 | 0.001203226 |
| BCAS1         | -0.874930283 | 9.802197324 | 0.001204652 |
| CITED4        | 0.336966823  | 7.8267442   | 0.001204652 |
| 2310035K24RIK | -0.581736827 | 9.523009258 | 0.001206052 |
| RAC3          | 0.167463604  | 7.624669054 | 0.001207173 |
| MST1R         | 0.489082937  | 8.826409911 | 0.001209147 |
| TMEM131       | 0.408596036  | 8.413549921 | 0.001209546 |
| STK25         | 0.246771777  | 8.686439801 | 0.001210118 |
| GUS-S         | 0.320613679  | 7.881702914 | 0.001210452 |
| 1810043H04RIK | -0.335841175 | 8.32699765  | 0.001211409 |
| NDUFA8        | -0.571379883 | 11.02147078 | 0.001211409 |
| 1300013J15RIK | -2.305882069 | 9.737132779 | 0.001213587 |
| GSTM7         | -0.273107833 | 7.806515514 | 0.00121999  |
| SERPINA3M     | 0.475147101  | 7.777574657 | 0.00122095  |
| NSBP1         | -0.517925162 | 9.346396275 | 0.001228474 |
| AP3M1         | -0.208624085 | 7.873113963 | 0.001229578 |
| SSSCA1        | 0.440280266  | 9.537404401 | 0.001233183 |
| WIPI1         | 0.290595935  | 7.970839921 | 0.001236796 |
| PRCP          | 0.505147072  | 9.392744003 | 0.001256794 |
| DNASE1        | -2.870019711 | 9.286360768 | 0.001257979 |
| 3110001P07RIK | -0.516727467 | 10.82779661 | 0.001260592 |
| KELCHL        | -0.158811753 | 7.923449466 | 0.001266585 |
| MGST3         | -1.026623646 | 11.42419915 | 0.001279223 |
| NDFIP2        | -0.609598324 | 9.397082244 | 0.001287604 |
| ACSBG1        | 0.123074051  | 7.60533254  | 0.001287802 |
| TMEM183A      | -0.40681128  | 9.823659241 | 0.001294974 |
| CLPS          | 1.756445582  | 10.58345239 | 0.001302068 |
| FADS2         | -0.240920332 | 7.781047469 | 0.001302068 |
| PTPLAD1       | -0.418061423 | 10.93277795 | 0.001308966 |

|               |              |             |             |             |
|---------------|--------------|-------------|-------------|-------------|
| AI448196      | 0.163751995  | 7.609701699 | 0.001312075 |             |
| C030046K23RIK | 0.121344412  | 7.641258923 | 0.001312075 |             |
| MARCKS        | 1.330301917  | 10.07176214 | 0.001315897 |             |
| 2410008K03RIK | 0.217690692  | 7.831729458 | 0.001318075 |             |
| ATP5S         | -0.26291383  | 7.961765089 | 0.001318111 |             |
| OPTN          | -1.006576985 | 9.514832319 | 0.001318111 |             |
| STK32C        | 0.17877304   | 7.572055583 | 0.001321974 |             |
| EG667190      | 0.833896485  | 9.569320426 | 0.001329125 |             |
| APPL2         | -0.441490199 | 8.69294283  | 0.001329811 |             |
| ATG5          | -0.451411512 | 9.845439755 | 0.001329811 |             |
| TUBA1A        | 0.326836232  | 8.112681518 | 0.001333355 |             |
| 9830002I17RIK | -0.465015616 | 7.816141708 | 0.001337597 |             |
| ANTXR1        | 0.226436102  | 7.785702285 | 0.001337597 |             |
| RAB35         | 0.397281091  | 10.19044757 | 0.001341273 |             |
|               | Sep-11       | 0.616892568 | 10.65887957 | 0.001351619 |
| AI846148      | 0.328123595  | 8.151229597 | 0.001353008 |             |
| GADD45A       | -0.61410206  | 9.129982577 | 0.001353185 |             |
| PEX16         | -0.458251498 | 9.322086467 | 0.001355318 |             |
| PRNP          | 1.180807359  | 9.954205426 | 0.001362994 |             |
| PPP1R11       | 0.381089764  | 9.912224235 | 0.001368013 |             |
| CD40          | 0.318523807  | 7.829739711 | 0.001369212 |             |
| PDK2          | -0.272501819 | 7.753315941 | 0.001373768 |             |
| MMP13         | 0.886809708  | 8.140454735 | 0.001376129 |             |
| SEPHS2        | -0.536707325 | 9.208157169 | 0.001378239 |             |
| LOC381221     | -0.608795395 | 8.043229528 | 0.001380131 |             |
| 0610042C05RIK | -0.169107967 | 7.726401239 | 0.001387252 |             |
| CLN3          | 0.276991     | 8.496468265 | 0.001387704 |             |
| LOC100047214  | -0.449077584 | 8.374284554 | 0.001387704 |             |
| CCDC134       | -0.602771587 | 8.711247866 | 0.001391861 |             |
| PGBPLL        | 0.278953023  | 8.296012287 | 0.001391861 |             |
| LOC100045780  | 0.373864061  | 7.976789411 | 0.001395721 |             |
| D430042O09RIK | -0.31364125  | 8.214759935 | 0.001398183 |             |
| 2810021B07RIK | -0.184293568 | 8.068296449 | 0.001401147 |             |
| 2310014G06RIK | -0.425870981 | 10.01758118 | 0.001403095 |             |
| 1110028F11RIK | 0.354779164  | 7.737950822 | 0.001405083 |             |
| CHTF18        | -0.208061496 | 7.84206058  | 0.001409409 |             |
| 0610005C13RIK | -0.250119295 | 7.631120577 | 0.001412309 |             |
| HISPPD1       | -0.252551972 | 7.970380414 | 0.001413411 |             |
| NCKAP1L       | 0.512362063  | 8.028675788 | 0.001418306 |             |
| AMIGO2        | 0.442827146  | 8.082597549 | 0.001421463 |             |
| CCDC41        | 0.526148701  | 8.638330201 | 0.001421463 |             |
| PIAS3         | 0.204819946  | 8.043376837 | 0.001421463 |             |
| TMEM106A      | -0.509371112 | 8.64829836  | 0.001421463 |             |
| TMEM128       | 0.258829269  | 9.989459819 | 0.001421463 |             |
| COL4A3BP      | 0.255473428  | 8.064568258 | 0.00142191  |             |
| LDB3          | -0.193443287 | 7.7120089   | 0.001422518 |             |
| AMDHD2        | -0.599086782 | 8.719011967 | 0.0014226   |             |
| LOC100044842  | -0.214849691 | 8.036100475 | 0.00142298  |             |
| RNF130        | 0.474948329  | 8.4569795   | 0.001425462 |             |
| SPATA6        | 0.354340659  | 7.705477932 | 0.001426544 |             |
| LOC210540     | -0.28941417  | 7.743625895 | 0.001427452 |             |
| LOC626152     | -1.01123913  | 9.836678187 | 0.001430577 |             |
| SH3BGRL2      | 0.716228206  | 8.552856104 | 0.001430577 |             |
| CASP1         | -1.222497081 | 11.78879288 | 0.001431904 |             |
| MYL7          | 0.397338778  | 7.86799869  | 0.001433804 |             |
| RERG          | 0.378658927  | 7.97623254  | 0.001439217 |             |
| H2-Q5         | -0.862914266 | 10.28402803 | 0.001441027 |             |
| TMPRSS7       | 0.201063487  | 7.77240632  | 0.001451713 |             |

|               |              |             |             |
|---------------|--------------|-------------|-------------|
| LRRC48        | -0.262907298 | 7.753995753 | 0.00145451  |
| TBCEL         | -0.612886562 | 9.307360236 | 0.00145451  |
| 3110009E18RIK | -0.294334883 | 8.485675938 | 0.001461323 |
| DEFKR5        | 2.435207053  | 13.45396316 | 0.001461323 |
| RIN1          | 0.858432075  | 8.53528059  | 0.001461323 |
| TICAM1        | -0.163943433 | 8.020774686 | 0.001461323 |
| LIMD1         | -0.505350265 | 8.710875628 | 0.001462574 |
| VASN          | 0.49447247   | 8.257082348 | 0.001464011 |
| D6WSU176E     | -0.777426693 | 9.376323776 | 0.001466002 |
| LOC100041103  | 0.188347422  | 7.69349902  | 0.001470005 |
| PODN          | -0.317301925 | 7.70435528  | 0.001470005 |
| PTGES2        | -0.209207297 | 7.985320977 | 0.001470005 |
| ITGB1         | 0.277121269  | 8.101820603 | 0.001480379 |
| LOC223653     | -0.495216783 | 8.041978557 | 0.001481255 |
| TTC39A        | 0.871356653  | 8.727842644 | 0.001487213 |
| BCL2L14       | -0.1929087   | 7.761046132 | 0.001488513 |
| PLEKHF1       | -0.800313863 | 8.259691686 | 0.001490733 |
| TLCD2         | -0.482291229 | 8.025875538 | 0.001492696 |
| PDCD10        | -0.386023896 | 9.876591355 | 0.001497421 |
| D1ERTD396E    | -0.375391825 | 8.50509447  | 0.001503796 |
| MS4A6D        | 0.897483455  | 8.05888005  | 0.001509319 |
| HIGD2A        | -0.465327075 | 12.55116037 | 0.001510646 |
| LOC98434      | 0.511887623  | 8.242089531 | 0.001517203 |
| ACO2          | -0.954491988 | 11.83037685 | 0.001518215 |
| ARHGDIG       | 0.164846588  | 7.639923501 | 0.001518215 |
| LOC100046025  | 1.211392988  | 9.20933209  | 0.00152018  |
| C030002B11RIK | -0.771563164 | 10.11395008 | 0.001520874 |
| ZFYVE1        | -0.151194204 | 7.772153053 | 0.00152649  |
| WWP1          | 0.178991555  | 7.884345577 | 0.001528121 |
| ACSS1         | -1.559856217 | 10.33146318 | 0.001547989 |
| ZFP768        | -0.270934643 | 8.028675472 | 0.001547989 |
| 2310066E14RIK | 0.145293989  | 7.667846036 | 0.001551589 |
| PLCD1         | -0.484658637 | 8.403510676 | 0.001551589 |
| IPMK          | -0.5735106   | 9.565324005 | 0.00155342  |
| PXMP4         | -0.269492387 | 8.366989008 | 0.00155342  |
| LOC547150     | -0.325946415 | 8.061299281 | 0.001554592 |
| 5730405I09RIK | -0.281748383 | 8.127065384 | 0.001554781 |
| NDUFB10       | -0.559193957 | 8.920181027 | 0.001557894 |
| NUPL1         | 0.189386243  | 8.04382423  | 0.001557894 |
| 6330503K22RIK | 0.319206005  | 7.769474644 | 0.001559986 |
| SIRT1         | -0.232489792 | 8.123064502 | 0.001561463 |
| GTF2E2        | 0.268155631  | 8.322502369 | 0.001565968 |
| IAH1          | -0.373056984 | 8.177418686 | 0.001568176 |
| DYNLL1        | 1.004226426  | 10.76260357 | 0.001575847 |
| GNG10         | 0.678631657  | 9.337195391 | 0.001575847 |
| CYB5          | -1.692843764 | 11.48949799 | 0.001577578 |
| CCND1         | 1.719766519  | 10.38912266 | 0.001578955 |
| ACOT7         | 0.949530776  | 9.160855534 | 0.001579764 |
| 2610103N14RIK | -0.262705663 | 7.719775852 | 0.001580365 |
| YRDC          | 0.439256387  | 8.096070774 | 0.001587662 |
| LOC100048299  | -0.983238054 | 11.4493055  | 0.001590099 |
| DHX36         | -0.364496576 | 9.146638221 | 0.001591064 |
| NDUFB3        | -0.539200047 | 10.46399881 | 0.001595436 |
| BAD           | -0.591065868 | 9.497880048 | 0.001602574 |
| LIG1          | -0.192016179 | 8.03052498  | 0.001602574 |
| ARHGEF1       | 0.163793534  | 8.104466553 | 0.001604381 |
| SLC22A5       | -0.676620249 | 9.22031821  | 0.001604381 |
| SPSB4         | -0.390059361 | 7.794446816 | 0.001608997 |

|               |              |             |             |
|---------------|--------------|-------------|-------------|
| BLOC1S1       | -0.504679922 | 9.147555377 | 0.001611503 |
| PIGL          | -0.553895893 | 8.473213859 | 0.001611503 |
| IL33          | 2.433356746  | 9.897703595 | 0.001613485 |
| ZDHHC4        | 0.285443997  | 9.614418741 | 0.00161491  |
| UVRAG         | 0.448919896  | 8.924313935 | 0.001617075 |
| 4833409A17RIK | -0.167901622 | 7.686591944 | 0.001627451 |
| 1110012J17RIK | 0.141507111  | 7.679474397 | 0.001627623 |
| 1700066B19RIK | 0.360844311  | 7.924880845 | 0.001628403 |
| LOC100042540  | -0.254558111 | 7.744977143 | 0.001639507 |
| MAN1B1        | -0.435793451 | 9.716792918 | 0.001642098 |
| GSTT3         | -0.754619304 | 9.791600331 | 0.001654829 |
| SCLY          | -0.310911344 | 7.970049583 | 0.001656538 |
| TGIF1         | 0.243555656  | 7.716262725 | 0.001666644 |
| CYP3A11       | -3.048214457 | 9.8173158   | 0.001669555 |
| ELOVL5        | 0.534696367  | 9.444270735 | 0.001669909 |
| AI507611      | 0.13172976   | 7.546496976 | 0.001674557 |
| DEFKR3        | 0.599446208  | 13.64943243 | 0.001675686 |
| H19           | 0.634992006  | 7.940907245 | 0.001679515 |
| SRP68         | -0.153287967 | 7.925636428 | 0.001681432 |
| LOC626309     | 0.639352213  | 10.22545025 | 0.001685341 |
| LLGL1         | 0.537578028  | 9.259962768 | 0.001690958 |
| MRPL27        | -0.458683473 | 10.23927371 | 0.001697094 |
| MED10         | 0.820498794  | 8.640212897 | 0.001698525 |
| 1200009I06RIK | -0.760462859 | 9.011125486 | 0.001711002 |
| NR112         | -0.618707146 | 9.26196124  | 0.001711002 |
| 2010004M13RIK | 0.416678366  | 8.393119234 | 0.001715065 |
| TIMP2         | 0.625020272  | 9.051670069 | 0.001715065 |
| DDX46         | 0.328348931  | 8.243205327 | 0.001724511 |
| 4930487N19RIK | 0.223576942  | 8.398596962 | 0.001730444 |
| HNF1B         | 0.198929744  | 7.745639656 | 0.001730643 |
| LOC381873     | -0.286878499 | 7.68500168  | 0.001737175 |
| UBE2A         | -0.420890741 | 8.358808861 | 0.001737175 |
| 2310079P12RIK | -0.428266639 | 8.256306096 | 0.001741885 |
| MMP2          | 1.122947237  | 8.512990203 | 0.001748431 |
| OLFML2B       | 0.989562331  | 8.218934315 | 0.001760122 |
| ABHD3         | -1.020453267 | 8.444300359 | 0.001763617 |
| OSGIN1        | -0.553437641 | 9.471741573 | 0.001774414 |
| DECR1         | -0.664858401 | 8.052285727 | 0.00178202  |
| GTPBP6        | 0.271802107  | 8.150491578 | 0.001782867 |
| NOC4L         | 0.39242265   | 8.62663332  | 0.001790288 |
| RABGGTB       | 0.288360074  | 9.452310078 | 0.001796973 |
| PRL2C3        | 1.743828648  | 8.002986721 | 0.001798942 |
| PPAP2C        | -0.330317455 | 11.66696152 | 0.001809418 |
| PGPEP1        | -0.837581557 | 8.880276145 | 0.001810125 |
| SHKBP1        | -0.130400288 | 8.008953181 | 0.001820989 |
| COPB2         | -0.366229988 | 12.36836166 | 0.00182557  |
| LOC384348     | 0.140532717  | 7.706595208 | 0.001829996 |
| TMEM82        | -0.84132936  | 10.472012   | 0.001834933 |
| CHGA          | 0.538723837  | 8.346721631 | 0.001835589 |
| DEM1          | -0.160600012 | 7.947083356 | 0.00183927  |
| EXOSC7        | -0.482584853 | 10.17555537 | 0.00183927  |
| TXNRD3        | 0.214096798  | 7.897034437 | 0.00183927  |
| MANBAL        | 0.581505344  | 10.74916444 | 0.001839392 |
| 9845300_5100  | 0.138828023  | 7.592715788 | 0.001843716 |
| GAS8          | 0.143662147  | 7.740262749 | 0.001847131 |
| 1700016K19RIK | 0.125492264  | 7.616401806 | 0.001870136 |
| ACLY          | 0.658629593  | 10.23193256 | 0.001870136 |
| ADAP1         | -0.200181787 | 8.373889562 | 0.001870136 |

|                |              |             |             |
|----------------|--------------|-------------|-------------|
| EFEMP2         | 0.676963065  | 8.27790938  | 0.001870136 |
| GRB7           | -0.945502763 | 11.00274543 | 0.001870136 |
| ABCF3          | -0.16594784  | 8.500437841 | 0.001875398 |
| 2900016G23RIK  | -0.249690369 | 7.901695197 | 0.001878754 |
| TIAM1          | 0.210035207  | 8.281596887 | 0.001881641 |
| E230008N13RIK  | 0.183280995  | 7.626800566 | 0.001886409 |
| APBB3          | -0.155051545 | 7.800957656 | 0.001896612 |
| AI597468       | -0.327607559 | 8.404343157 | 0.001901265 |
| EBI3           | 0.151221393  | 7.71052356  | 0.001902692 |
| CYB5B          | -0.66404288  | 12.60405532 | 0.001907587 |
| MAST3          | -0.657386777 | 8.973487733 | 0.001909227 |
| BSPRY          | 0.47403167   | 8.381668401 | 0.001925849 |
| RILPL2         | 0.718904385  | 9.100726697 | 0.001925849 |
| EPHA1          | -0.478003555 | 7.986670193 | 0.001940461 |
| 1700021K19RIK  | -0.324735967 | 8.302649683 | 0.001942577 |
| SLC10A6        | 0.234099541  | 7.673662616 | 0.001943735 |
| 2310011J03RIK  | -0.153368611 | 7.892813607 | 0.001957657 |
| TRF            | 0.519099619  | 7.907020075 | 0.001957657 |
| MPP1           | -0.661059025 | 10.07905975 | 0.001958897 |
| ACOT4          | -0.842877324 | 8.643149385 | 0.001958972 |
| A230050P20RIK  | 0.619701991  | 8.551792441 | 0.00196289  |
| OPN3           | 0.270345472  | 7.661066278 | 0.00196289  |
| ANTXR2         | 0.685277207  | 8.446453234 | 0.001976705 |
| CCDC28A        | -0.170916169 | 7.756266923 | 0.001976725 |
| GPT1           | -1.742178694 | 11.38705282 | 0.001977876 |
| SERINC1        | 0.388523194  | 10.18436573 | 0.001987372 |
| RQCD1          | -0.179345609 | 8.219016599 | 0.001993418 |
| PGS1           | 1.122831334  | 11.13764582 | 0.001998827 |
| SDHD           | -0.444411583 | 8.38457443  | 0.00200263  |
| IL17RC         | -1.320288217 | 10.05618587 | 0.002004481 |
| MAL            | 0.11798046   | 7.590854806 | 0.002004481 |
| 4732458O05RIK  | -0.919973628 | 9.164581175 | 0.002004897 |
| CML1           | -0.357086511 | 8.133334798 | 0.002019674 |
| GANAB          | -0.355958075 | 9.172349656 | 0.002019674 |
| SCL0002540.1_6 | 0.127210142  | 7.631485693 | 0.002019674 |
| SNUPN          | 0.18753286   | 8.148888682 | 0.002021376 |
| LOC381150      | 0.770156102  | 10.39052794 | 0.002023375 |
| LOC385825      | 0.35812723   | 9.10607028  | 0.002023375 |
| ZFP747         | -0.609017201 | 10.09356663 | 0.002023375 |
| RAP1GAP        | 0.279023464  | 8.186754312 | 0.002025391 |
| D16H22S680E    | -0.519692533 | 9.812436557 | 0.002026169 |
| TSPYL3         | 0.223341998  | 7.860555134 | 0.002026169 |
| TRIM38         | -0.320700452 | 7.780635935 | 0.002034813 |
| CAPN8          | 0.180718131  | 7.700071071 | 0.002036411 |
| SPR            | -0.330861655 | 8.548782729 | 0.002036411 |
| GORASP1        | -0.255417816 | 8.467919897 | 0.002039605 |
| ANKRD47        | 0.631682297  | 8.064550844 | 0.002043547 |
| ODZ4           | 0.192637874  | 7.743565597 | 0.002043547 |
| 9130022E12RIK  | -0.161292533 | 7.57420847  | 0.002050151 |
| DHRS7B         | -0.861594581 | 10.15130447 | 0.002053701 |
| PPP5C          | -0.172741149 | 8.151764118 | 0.002053701 |
| UCK2           | 0.557402534  | 8.851104904 | 0.002053701 |
| LOC100041681   | -0.218061341 | 7.967866824 | 0.002057155 |
| GM379          | 0.245770793  | 7.752257789 | 0.002061209 |
| 1700019H03RIK  | 0.292170111  | 7.723619599 | 0.002061212 |
| PLAC8          | -0.482396805 | 13.44952978 | 0.002061271 |
| ABCF2          | 0.350402701  | 8.935596699 | 0.00206315  |
| GPAA1          | -0.234551478 | 8.028803919 | 0.002066967 |

|                   |              |             |             |
|-------------------|--------------|-------------|-------------|
| STARD3            | -0.323254891 | 8.475850773 | 0.002070818 |
| 4930432O21RIK     | -0.3056456   | 8.217232318 | 0.002100208 |
| CRYBA2            | 0.337308679  | 7.907758078 | 0.002100208 |
| TMEM19            | -0.557652955 | 8.448041929 | 0.002100208 |
| UQCR              | -0.516243293 | 13.07926378 | 0.002101361 |
| 2510010F15RIK     | 0.32671378   | 8.3780512   | 0.002110782 |
| FRMD6             | 0.369501336  | 8.191469163 | 0.002119327 |
| RNF12             | 0.17657052   | 7.659421998 | 0.002120107 |
| CALCB             | 0.191889813  | 7.607693472 | 0.002121051 |
| TCF23             | 0.498432614  | 8.022423635 | 0.002139418 |
| ALCAM             | 0.267493848  | 7.780209987 | 0.002148443 |
| RGS10             | 0.524946469  | 8.937839604 | 0.002148443 |
| UCK1              | -0.144472788 | 7.804070298 | 0.00216328  |
| TMEM43            | 0.787047695  | 9.41753299  | 0.002164031 |
| DOKIST3           | -0.68844994  | 9.017938793 | 0.002164078 |
| CCDC111           | -0.25362838  | 7.959021845 | 0.002165808 |
| 2310057J16RIK     | -0.167717122 | 8.176498167 | 0.002166824 |
| CUL7              | 0.530032905  | 8.364966207 | 0.002166824 |
| SLC9A3R2          | 0.2697358    | 7.894732821 | 0.002170703 |
| EGR1              | 1.642433733  | 10.62812459 | 0.002173839 |
| TLR1              | 0.131839017  | 7.625908934 | 0.002173839 |
| CLEC4N            | 0.604264463  | 8.107217386 | 0.002177309 |
| FAM110B           | 0.30958959   | 7.935499627 | 0.002184642 |
| SPARC             | 0.537219998  | 8.235463711 | 0.002184642 |
| MXRA8             | 0.245048529  | 7.813555714 | 0.002185527 |
| RTN4IP1           | -0.250239485 | 7.91802375  | 0.002185527 |
| ADK               | -0.566372156 | 10.08120405 | 0.00218633  |
| JMJD6             | 0.526532749  | 10.44601429 | 0.00218633  |
| C230082I21RIK     | -0.469331672 | 8.410308919 | 0.002187661 |
| SDC4              | 0.35791167   | 9.414345857 | 0.002187661 |
| HRAS1             | 0.33144131   | 9.331670685 | 0.002191048 |
| LOC100044221      | 0.306423997  | 7.968896915 | 0.002191048 |
| GUCA2A            | -1.24043271  | 13.98817522 | 0.002192528 |
| TPD52L2           | 0.245799313  | 8.225238706 | 0.002192528 |
| AIF1              | 0.653846625  | 8.119186073 | 0.002192647 |
| SCL0004176.1_1597 | -0.182434981 | 8.096843521 | 0.0021935   |
| PITX2             | -0.291079274 | 8.133231258 | 0.002199262 |
| LOC100048313      | -0.387322421 | 8.429422509 | 0.002201539 |
| AIM2              | 0.322135165  | 7.912992954 | 0.002207863 |
| LOC100044692      | -0.382480071 | 12.61680821 | 0.002207863 |
| LOC639931         | 0.288437654  | 9.743492721 | 0.002207863 |
| MAD2L1BP          | 0.288068994  | 9.319905861 | 0.002207863 |
| MRPL17            | 0.427164375  | 11.31921717 | 0.002207863 |
| SCL0002315.1_12   | 0.847103528  | 9.024751185 | 0.002207863 |
| ZHX1              | -0.140642557 | 7.897310654 | 0.002207863 |
| CCDC5             | -0.231799481 | 8.00690249  | 0.002215643 |
| BC031353          | 0.294637854  | 7.96383949  | 0.002222575 |
| GPR146            | 0.193753474  | 7.692070711 | 0.002222575 |
| SPEN              | -0.169108615 | 7.896538877 | 0.002234187 |
| COPZ1             | -0.600737386 | 10.29646298 | 0.002248742 |
| ENPP5             | -0.222319356 | 8.159930213 | 0.002251472 |
| LBH               | 0.719554494  | 9.015887682 | 0.002257654 |
| SLC27A4           | -0.957007759 | 9.692633016 | 0.002257654 |
| AFTPH             | -0.376534274 | 10.13294368 | 0.002261311 |
| TSPO              | 0.795117611  | 9.078337797 | 0.002262332 |
| PLEKHM2           | 0.775810628  | 9.211723083 | 0.002268435 |
| SLC28A1           | -2.055475076 | 8.745094287 | 0.002281462 |
| BC003940          | 0.627729133  | 9.3823955   | 0.002288929 |

|                    |              |             |             |
|--------------------|--------------|-------------|-------------|
| PRPF38B            | -0.253209323 | 8.066915646 | 0.002295613 |
| BRWD2              | -0.147317822 | 7.865122397 | 0.002302484 |
| D630002J18RIK      | -0.163059447 | 7.785332926 | 0.002302484 |
| ACOT8              | -0.441964272 | 9.131272289 | 0.002302571 |
| 5730469M10RIK      | -1.62203896  | 11.47595587 | 0.002303206 |
| ADPRH              | 0.384566488  | 9.999334949 | 0.002303206 |
| RNF121             | -0.151210705 | 7.783120881 | 0.002303206 |
| VAR5               | 0.531171926  | 8.855680192 | 0.002303206 |
| PRKAB1             | 0.665386028  | 9.359906419 | 0.00232921  |
| 2810422J05RIK      | -0.160014241 | 7.822938097 | 0.002352162 |
| MOCOS              | -0.906594793 | 9.316292647 | 0.002352162 |
| 2010305A19RIK      | -0.398975462 | 8.073207159 | 0.002358235 |
| TMEM167B           | -0.188176133 | 8.624559723 | 0.002358235 |
| FPGT               | -0.193048711 | 8.138427995 | 0.002364255 |
| PDE1A              | 0.131786202  | 7.647164548 | 0.002383481 |
| EG666231           | -0.353716933 | 7.973723186 | 0.002389153 |
| KLC4               | -0.656782248 | 10.69153211 | 0.002389153 |
| LOC217328          | -0.827038439 | 12.16526374 | 0.002389153 |
| MAPK1              | -0.704235059 | 9.82928638  | 0.002390197 |
| TMEM125            | 0.712148182  | 9.746547103 | 0.002391501 |
| BRP17              | -0.272708826 | 7.929541036 | 0.002397632 |
| SNAI3              | 0.322527503  | 7.693566487 | 0.002400103 |
| B430201A12RIK      | 0.575974567  | 8.960760801 | 0.002406675 |
| ZMAT5              | -0.234683165 | 8.487749401 | 0.002406675 |
| LOC100048733       | 0.594201668  | 7.693333055 | 0.002408861 |
| UFSP1              | 1.236553382  | 8.424614508 | 0.002408861 |
| AHI1               | 0.308262122  | 7.900886278 | 0.002412637 |
| MRO                | -0.218204598 | 7.625284357 | 0.002412637 |
| TUBA1B             | 0.66357443   | 12.82671501 | 0.002429761 |
| CDH5               | 0.164761583  | 7.651222923 | 0.002445557 |
| XKR9               | -0.53216909  | 8.497467716 | 0.002445557 |
| BGLAP-RS1          | 0.480586527  | 7.800383462 | 0.00244976  |
| LOC100047184       | 0.327311132  | 12.33445859 | 0.002459481 |
| DLG3               | -0.600277525 | 9.883517066 | 0.002466585 |
| ENTPD5             | -0.62860135  | 8.832467311 | 0.002470334 |
| AIFM1              | -0.224409469 | 8.025801167 | 0.002471064 |
| PRL2C4             | 1.408450434  | 7.909632928 | 0.002473415 |
| CARTPT             | 0.204685393  | 7.66881845  | 0.002483551 |
| LOC100048480       | -0.592863077 | 9.821787223 | 0.002488211 |
| CRK                | 0.345482966  | 9.690818243 | 0.002490275 |
| ARL2               | -0.247052903 | 8.258557778 | 0.002490783 |
| RIT1               | 0.441849767  | 9.527970456 | 0.002490783 |
| 6330548G22RIK      | 0.240397726  | 8.418958984 | 0.002495845 |
| OTTMUSG00000002196 | 0.190497785  | 7.581279572 | 0.002498102 |
| LOC668492          | 0.344344276  | 9.137371623 | 0.002509831 |
| AQP1               | -1.860696018 | 10.59571746 | 0.002512109 |
| BAG4               | -0.362258358 | 8.767651889 | 0.002512109 |
| RHOB               | 0.751842689  | 9.452621746 | 0.002512109 |
| SLC19A2            | 0.869819953  | 9.212509997 | 0.002514166 |
| 1110021J02RIK      | -0.318647726 | 8.267758158 | 0.002544411 |
| TIMM44             | -0.262478284 | 8.981644549 | 0.002546237 |
| LOC100041567       | -0.431550923 | 8.545662706 | 0.002547385 |
| AGPAT6             | 0.557389714  | 9.769736544 | 0.002548977 |
| DGKQ               | -0.845897347 | 9.691014757 | 0.002548977 |
| DTX3L              | -1.145916065 | 10.10952017 | 0.002549054 |
| ABHD11             | 0.330110824  | 9.830256832 | 0.002552401 |
| NFE2L1             | 0.385396313  | 10.4087891  | 0.002552401 |
| CD86               | 0.19614116   | 7.789177464 | 0.002571538 |



|               |              |             |             |
|---------------|--------------|-------------|-------------|
| GPR182        | 0.172865295  | 7.640559027 | 0.00257318  |
| LOC433749     | 0.488820594  | 10.37819453 | 0.00257318  |
| ABCC3         | 1.260780289  | 9.411616993 | 0.002576959 |
| ADORA2B       | -1.057663117 | 8.225332744 | 0.002576959 |
| STARD7        | -0.353121491 | 8.498474176 | 0.002576959 |
| LIPE          | -0.112295767 | 7.721681423 | 0.002585408 |
| RAPGEF3       | 0.194748945  | 7.622054029 | 0.002591046 |
| TMEM127       | -0.417254141 | 9.942643842 | 0.002599561 |
| S100A5        | 0.206813945  | 7.804895968 | 0.002608141 |
| VPS53         | 0.364716368  | 10.90539768 | 0.002608141 |
| NTE           | -0.414752527 | 9.880081978 | 0.002615738 |
| ABCB1B        | 0.465898187  | 7.771840569 | 0.002621908 |
| 1500004F05RIK | 0.200190239  | 7.639369388 | 0.002625922 |
| EML4          | -0.471732431 | 9.547184501 | 0.002630162 |
| 9430095K15RIK | -0.226177321 | 7.729575688 | 0.002637822 |
| A830094I09RIK | 0.194528456  | 7.564111232 | 0.002639411 |
| LOC386218     | 0.350763099  | 9.154089241 | 0.002639685 |
| SLC6A8        | -0.909732737 | 12.55835398 | 0.002639685 |
| TWF2          | 0.430175174  | 8.252590453 | 0.002639685 |
| ADAMTS1       | 0.11249757   | 7.622069441 | 0.002642183 |
| AKR1A4        | -0.352008683 | 12.92174173 | 0.002642183 |
| RALB          | 0.724525746  | 10.14874118 | 0.002642183 |
| COL16A1       | 0.532074346  | 8.300738036 | 0.002649338 |
| 2310036O22RIK | 0.359433983  | 10.80191824 | 0.002652525 |
| SLC25A3       | -0.435416891 | 10.88028072 | 0.002653297 |
| MTAP7D1       | 0.965715656  | 8.717015006 | 0.002668616 |
| UBAC2         | -0.26753963  | 9.198500348 | 0.002670879 |
| KCTD2         | -0.565274596 | 9.465936102 | 0.002675616 |
| BC023744      | -0.212197227 | 7.795159561 | 0.00268563  |
| CYHR1         | -0.323774364 | 8.230657819 | 0.00268563  |
| UQCRC2        | -0.436156147 | 12.10451418 | 0.00269221  |
| RAB27A        | 0.779687216  | 9.868273228 | 0.002701791 |
| BCKDK         | -0.267410118 | 8.696127424 | 0.002702248 |
| RPP21         | 0.451759908  | 10.71494922 | 0.002702856 |
| RAB34         | 0.16303383   | 7.751233385 | 0.002704015 |
| WWP2          | -0.298726386 | 8.193001606 | 0.002713423 |
| CWF19L2       | -0.182916545 | 8.272859661 | 0.002718449 |
| RHPN2         | 0.850407177  | 10.25889194 | 0.002723302 |
| WBP4          | 0.228154048  | 8.131661196 | 0.002726491 |
| 2610024H22RIK | 0.81179436   | 10.43131001 | 0.002727728 |
| COMMD3        | 0.328797415  | 9.599325498 | 0.002727861 |
| E130319B15RIK | -0.150303116 | 7.597675605 | 0.002738036 |
| PTPN1         | 0.298365872  | 8.1103535   | 0.002738036 |
| ACVR1C        | -0.260333628 | 7.728833838 | 0.002748522 |
| ATP5SL        | -0.689677458 | 8.744112584 | 0.002748522 |
| ANGPTL4       | 1.629940231  | 9.833431389 | 0.002756005 |
| 5830434P21RIK | 0.335270728  | 8.514236433 | 0.002757548 |
| CDK5RAP3      | -0.302565595 | 10.39728447 | 0.002757548 |
| GM1673        | 0.123851935  | 7.598697797 | 0.002757548 |
| GOLIM4        | -0.29769891  | 8.21281035  | 0.002757548 |
| PGLS          | -0.24676787  | 8.3138616   | 0.002757548 |
| E030007H10RIK | -0.207624889 | 7.894194594 | 0.002759966 |
| IPO4          | 0.335237639  | 8.247408506 | 0.002759966 |
| NSEP1         | 0.599927212  | 12.88068358 | 0.002759966 |
| 5930434B04RIK | 0.261992476  | 8.273255672 | 0.002764121 |
| LOC100046393  | 0.250037996  | 8.959092552 | 0.002764121 |
| PSMD1         | 0.441242039  | 11.40330652 | 0.002764121 |
| CDC2L1        | -0.297361802 | 9.171904802 | 0.00276871  |

|               |              |             |             |
|---------------|--------------|-------------|-------------|
| GRIT          | -0.742397526 | 9.885511462 | 0.00276871  |
| PTGR2         | -0.299574935 | 7.996364314 | 0.00276871  |
| ZSWIM3        | -0.193990351 | 7.962739392 | 0.00276871  |
| ARID3A        | 0.551491835  | 8.342855273 | 0.002772768 |
| DEGS2         | 0.463508328  | 10.7847416  | 0.002772768 |
| ITLN1         | 0.727962014  | 11.82864281 | 0.002775735 |
| 2010001P20RIK | -1.727423279 | 9.961505351 | 0.002784857 |
| IFITM6        | 0.212937724  | 7.620355645 | 0.002786734 |
| EG622339      | 0.823893206  | 12.10688039 | 0.002795892 |
| 3110056O03RIK | -0.319557088 | 8.951003725 | 0.002801212 |
| 9130211I03RIK | 0.13296105   | 7.614198659 | 0.002812114 |
| LOC381947     | 0.38765713   | 8.510697833 | 0.002812114 |
| D130043K22RIK | -0.928189051 | 8.643546441 | 0.002825181 |
| MOBKL2A       | 0.280457029  | 8.499133873 | 0.002825181 |
| TAF12         | -0.171873355 | 8.784223133 | 0.002827096 |
| ABCD4         | -0.234359959 | 7.907746083 | 0.002830516 |
| IMPDH1        | 0.143557412  | 7.670506774 | 0.002830516 |
| ITGB4BP       | 0.517159036  | 8.351153205 | 0.002830516 |
| STAT6         | -0.182253152 | 7.963465433 | 0.002830516 |
| TBX2          | 0.156170305  | 7.61595232  | 0.002830516 |
| AI317223      | 0.160162686  | 7.678375697 | 0.00283066  |
| C920006O11RIK | 0.239307466  | 7.820896395 | 0.00283066  |
| STXBP5        | -0.247863093 | 8.576449403 | 0.00283066  |
| GSPT2         | 0.186241409  | 7.677631872 | 0.00284372  |
| ORC3L         | -0.194385632 | 7.83556218  | 0.00284372  |
| 9130008F23RIK | 0.309256033  | 7.798041526 | 0.002847901 |
| CCDC85B       | 0.282713002  | 8.088245212 | 0.002847901 |
| SOX18         | 0.301640533  | 7.746295469 | 0.002847901 |
| NEUROG3       | -0.198933121 | 7.757524147 | 0.002851441 |
| PA2G4         | 0.496595633  | 8.810041042 | 0.002854714 |
| SLC11A2       | -0.263811923 | 8.032595568 | 0.002854714 |
| D130071O13RIK | 0.121707622  | 7.620337366 | 0.002855573 |
| 1200016E24RIK | 1.252971202  | 10.10404558 | 0.002864772 |
| 2310001H17RIK | -0.48147967  | 8.405952272 | 0.002864772 |
| WDR24         | -0.178748694 | 8.02919818  | 0.002864772 |
| PVRL2         | 0.665825317  | 9.910692574 | 0.002865803 |
| EIF2S2        | 0.747340196  | 9.631999088 | 0.002869686 |
| RASSF1        | 0.290553313  | 9.009906265 | 0.002883318 |
| 5133401N09RIK | -0.623858424 | 9.419416862 | 0.002883923 |
| 5033430I15RIK | -0.305269595 | 8.441741787 | 0.002887263 |
| GSTT2         | -0.273113096 | 8.235459007 | 0.002890717 |
| C130065N10RIK | -0.811535558 | 8.808272735 | 0.002890922 |
| LOC100047200  | -0.872268346 | 10.36514466 | 0.002890922 |
| LOC630936     | 1.018607177  | 11.72802911 | 0.002890922 |
| PAF1          | -0.10472567  | 7.936050866 | 0.002890922 |
| MYO7A         | -0.40294085  | 7.809063631 | 0.002893126 |
| BC024997      | -1.143666761 | 10.12268648 | 0.002895086 |
| C1QB          | 1.336513086  | 8.520815439 | 0.002895086 |
| S100A10       | 0.721761624  | 11.5623504  | 0.002895086 |
| GOLGA7        | 0.276928474  | 7.929391382 | 0.002911007 |
| ARPC5         | 0.293672875  | 11.78064435 | 0.002913013 |
| CENTD3        | 0.730850253  | 8.357749533 | 0.002913013 |
| LOC386021     | 0.320394101  | 8.748154954 | 0.002923509 |
| 8030451K01RIK | -0.193855409 | 7.865461958 | 0.002930328 |
| 2010300C02RIK | -0.389727946 | 8.343567936 | 0.002931147 |
| 0610009D07RIK | -0.121025659 | 7.924525094 | 0.002938369 |
| H6PD          | 1.026155514  | 9.617698358 | 0.002938369 |
| ARG1          | 0.198534358  | 7.603635833 | 0.00294308  |

|               |              |             |             |
|---------------|--------------|-------------|-------------|
| ZSWIM6        | 0.222056298  | 8.132746759 | 0.00294308  |
| CDO1          | -0.467406815 | 8.108553029 | 0.002956871 |
| IFT81         | 0.120363639  | 7.854338906 | 0.002966742 |
| ADAMTS2       | 0.296498539  | 8.053861877 | 0.002968082 |
| IGF1          | 0.185842876  | 7.704621219 | 0.002973863 |
| PRPF4         | 0.22503024   | 8.006167652 | 0.002979125 |
| 2310061F22RIK | 0.343397383  | 9.309757145 | 0.00297998  |
| ATP6V1B2      | 0.52488008   | 10.96927964 | 0.002986962 |
| AGMAT         | -0.90755937  | 9.003052274 | 0.002992947 |
| EG432448      | 0.551890667  | 10.24690323 | 0.002995999 |
| 1810009K13RIK | 0.158765379  | 7.978110597 | 0.003012352 |
| OTUD7B        | 0.165755721  | 7.824538351 | 0.003016008 |
| KLHL22        | -0.180717669 | 8.005873321 | 0.003017427 |
| TNF           | 0.202541051  | 7.609218038 | 0.003039771 |
| 1810015C11RIK | -1.172518712 | 9.454024615 | 0.003047891 |
| ATP1A1        | -0.726539912 | 13.87258446 | 0.003047891 |
| MRPS35        | -0.435474086 | 9.009700394 | 0.00305471  |
| LMO7          | 0.485158573  | 8.997635525 | 0.003057053 |
| WISP1         | 0.353530956  | 7.809478662 | 0.00307804  |
| ISCA1         | -0.383090408 | 8.82228154  | 0.003093981 |
| 9930022F21RIK | 0.233103048  | 7.671927942 | 0.003105321 |
| MAFF          | 0.167296149  | 7.714623783 | 0.00311584  |
| 4632411B12RIK | -0.176755856 | 8.448579705 | 0.003123835 |
| D10ERTD641E   | 0.353185397  | 10.34458571 | 0.003135253 |
| MTAP7         | -0.449389682 | 9.366211095 | 0.003135253 |
| RSN           | 0.257644587  | 8.189635546 | 0.003141498 |
| CLPTM1        | -0.367194496 | 9.060882559 | 0.003146695 |
| SPON2         | 1.483199092  | 10.63237526 | 0.003153802 |
| BICC1         | 0.396242927  | 8.163447348 | 0.003164557 |
| 2210016L21RIK | 0.126994338  | 8.03110715  | 0.003173956 |
| ABCC10        | -0.128831234 | 7.740967364 | 0.003175738 |
| CYC1          | -0.737268408 | 11.15752242 | 0.003177803 |
| CHKB          | -0.454707553 | 9.533820621 | 0.003181408 |
| B930041F14RIK | 1.2690681    | 9.297438308 | 0.00318267  |
| RNF11         | 0.311433115  | 8.551166188 | 0.00318267  |
| 1500011B03RIK | 0.125378975  | 7.606689413 | 0.0031953   |
| MATR3         | 0.200376883  | 11.39680546 | 0.003196161 |
| OCRL          | 0.212161883  | 8.144794303 | 0.003197144 |
| EMP3          | 0.755348838  | 8.994857397 | 0.003197857 |
| IGSF4A        | 0.216329154  | 7.783617274 | 0.003211267 |
| EPN1          | -0.155784452 | 7.761787207 | 0.003216197 |
| PPAPDC2       | -0.307550519 | 9.072670201 | 0.003216197 |
| TM9SF2        | -0.275079779 | 8.167988984 | 0.003223497 |
| GDPD1         | -1.299921832 | 10.70137175 | 0.003235829 |
| B930044G13RIK | -0.192465162 | 7.903021161 | 0.003236495 |
| BTNL7-PENDING | -0.220101943 | 7.731119295 | 0.003236866 |
| UBE2E2        | 0.779511318  | 8.936810753 | 0.003236866 |
| ACADS         | -0.434936216 | 8.649477726 | 0.003253461 |
| HEXA          | -0.564651864 | 9.751692853 | 0.003253552 |
| GM2A          | 0.870121906  | 8.90459909  | 0.003264346 |
| CBFB          | 0.358512128  | 9.29973299  | 0.003269932 |
| ALDH5A1       | -0.266125626 | 8.283814079 | 0.003271156 |
| LOC333331     | -0.686568611 | 8.678285694 | 0.003280936 |
| DPM2          | 0.428443786  | 9.249575408 | 0.003283785 |
| NUDT1         | -0.286548452 | 8.392040956 | 0.003283785 |
| CCDC90B       | -0.302879021 | 8.94212375  | 0.003286998 |
| B230107H12RIK | -0.176422351 | 7.889794514 | 0.003288892 |
| MFSD8         | -0.48729064  | 8.409323062 | 0.003309936 |

|                    |              |             |             |
|--------------------|--------------|-------------|-------------|
| LOC100047167       | 0.301609634  | 8.043589963 | 0.003310057 |
| CRBN               | -0.312161071 | 7.892847375 | 0.003314197 |
| OXCT2B             | 0.216224333  | 7.595323042 | 0.003314197 |
| PDLIM4             | 0.586034325  | 8.392776522 | 0.003314197 |
| PFDN2              | 0.402356214  | 9.733262773 | 0.003314197 |
| 2010007H12RIK      | -0.340278747 | 8.9199317   | 0.003318118 |
| CART               | 0.352850065  | 7.738836385 | 0.003320387 |
| LYSMD4             | -0.521413284 | 8.593368687 | 0.003321973 |
| TMEM109            | 0.488720145  | 9.442387457 | 0.003321973 |
| PCNX               | -0.182366059 | 7.751666154 | 0.003331903 |
| LOC674308          | -0.34412486  | 8.865597869 | 0.003334201 |
| TRIM40             | 0.581583704  | 8.853248341 | 0.003334201 |
| RBM9               | 0.226045519  | 7.998910913 | 0.003339679 |
| LRRC20             | 0.134960195  | 7.813858454 | 0.003339848 |
| ZFP294             | -0.132197565 | 7.773337453 | 0.003347316 |
| GSTT1              | -0.551774552 | 8.200853009 | 0.003349955 |
| RPS6KA3            | 0.289990417  | 8.180789817 | 0.003349955 |
| LOC100048020       | -0.472568671 | 8.953635795 | 0.003352794 |
| MAPK3              | -0.284674236 | 8.351820625 | 0.003352794 |
| C030048B08RIK      | 0.128116455  | 8.168689061 | 0.003375005 |
| CTDSP1             | -0.285997095 | 8.31022789  | 0.00337927  |
| TREX2              | 0.626045344  | 7.8021253   | 0.003389056 |
| 5730494N06RIK      | -0.340751159 | 9.070499734 | 0.003393661 |
| BMI1               | 0.112116316  | 7.657733247 | 0.003394412 |
| CAR13              | -0.84140132  | 10.77471554 | 0.003432998 |
| OTTMUSG00000000971 | 0.583197016  | 7.778975449 | 0.003432998 |
| PUM1               | -0.290730928 | 8.825330303 | 0.003432998 |
| 2510049J12RIK      | -0.509523848 | 10.49473231 | 0.003441951 |
| MRPL49             | -0.353189756 | 8.562484865 | 0.003441955 |
| STAP2              | -0.542702821 | 8.764655369 | 0.0034484   |
| TYSND1             | -0.187660262 | 7.839347273 | 0.003449498 |
| LOC100047712       | 0.402167649  | 8.707264659 | 0.003465511 |
| PIGA               | 0.264050707  | 8.375513036 | 0.003468643 |
| GSTM5              | 0.362381429  | 8.984055506 | 0.003471369 |
| TBC1D5             | -0.432932192 | 8.457875422 | 0.003471369 |
| C4A                | 0.46258508   | 8.440663464 | 0.0034718   |
| DUS2L              | -0.240959921 | 7.878507587 | 0.003473274 |
| GPR120             | 1.039479055  | 9.137181148 | 0.003473274 |
| 2610037P13RIK      | -0.153894722 | 7.814330418 | 0.003483392 |
| WWC2               | 0.893430269  | 8.838087885 | 0.003504305 |
| WNK1               | 0.153610879  | 8.208705837 | 0.003529451 |
| N6AMT1             | 0.243479996  | 8.626595157 | 0.003536748 |
| LUC7L              | 0.207334724  | 8.154355929 | 0.003539962 |
| 2900057K09RIK      | 0.259964641  | 8.336354622 | 0.003546065 |
| CYP2D40            | -0.212327435 | 7.732700258 | 0.003546065 |
| PLSCR1             | 1.602855308  | 11.09362338 | 0.003546065 |
| UBTD1              | 0.153109621  | 7.654052323 | 0.00355625  |
| TTYH1              | 0.2490324    | 7.667199597 | 0.003561904 |
| LOC100045403       | 0.906389258  | 9.377459691 | 0.003567458 |
| TPI1               | -0.472982481 | 11.97130521 | 0.003574812 |
| CBARA1             | -0.288481627 | 9.165639105 | 0.003580117 |
| CYP2B10            | -3.317107058 | 9.725987429 | 0.00358289  |
| HIST2H3B           | 0.353986775  | 10.11923265 | 0.003596759 |
| GPR133             | -0.507009764 | 8.035227027 | 0.00359758  |
| GPSM1              | 0.257610617  | 7.755885746 | 0.003611802 |
| UBE2F              | 0.260975893  | 9.685906458 | 0.003611802 |
| PARD6G             | 0.167973134  | 7.781478017 | 0.00361816  |
| LOC100044756       | -0.167548003 | 8.110609273 | 0.00363618  |

|                |              |             |             |
|----------------|--------------|-------------|-------------|
| CD68           | 0.302768728  | 7.680822297 | 0.003637087 |
| D2WSU81E       | -0.139234851 | 7.68797242  | 0.00363844  |
| SNURF          | -0.588401137 | 8.949333026 | 0.003646903 |
| BBC3           | 0.209310136  | 7.895721209 | 0.00367252  |
| A830026B15RIK  | -0.109178647 | 7.616717928 | 0.003676702 |
| NPAL1          | 0.518275496  | 9.271886369 | 0.003676702 |
| SKP2           | -0.148863243 | 7.839020326 | 0.003707784 |
| EXPI           | 0.142015033  | 7.547537209 | 0.003708048 |
| SNAPIN         | 0.204832148  | 8.144048745 | 0.003708048 |
| MFSD10         | 0.405549871  | 8.834853431 | 0.003710203 |
| OPLAH          | -0.431502359 | 8.125985155 | 0.003712152 |
| TRP53INP1      | 0.430755673  | 8.222296324 | 0.003728157 |
|                | Mar-02       |             |             |
| IL1B           | -0.164054271 | 8.299078029 | 0.00372947  |
| 1810049H13RIK  | 0.493235649  | 7.743511508 | 0.003730396 |
| GSG2           | -0.286170341 | 8.109877946 | 0.003735143 |
| RABL4          | -0.285898808 | 8.109953777 | 0.003740353 |
| APOM           | 0.220309183  | 8.095068264 | 0.003740353 |
| IVNS1ABP       | 0.153754872  | 7.628828178 | 0.003745742 |
| PPP1R16A       | -0.631282208 | 9.183324373 | 0.003745742 |
| SLU7           | -0.55066583  | 8.741780809 | 0.003745742 |
| ZFP238         | -0.107041112 | 7.826938285 | 0.003745742 |
| LOC277856      | -0.174822503 | 7.929670825 | 0.003745742 |
| NOTCH3         | -0.72743968  | 11.76973216 | 0.00376342  |
| C130078N17RIK  | 0.175664436  | 7.643042995 | 0.003772756 |
| 9130024O20RIK  | 0.420512892  | 8.065166362 | 0.003779778 |
| SCL0003131.1_3 | -1.230168326 | 10.46101291 | 0.003786412 |
| ACSL4          | 0.157224709  | 7.686571814 | 0.003793351 |
| VILL           | 0.101677119  | 7.623328584 | 0.003794743 |
| 6330549D23RIK  | 0.126841354  | 7.581805223 | 0.003794743 |
| SEC14L1        | 0.119428216  | 7.699525762 | 0.003812364 |
| SLC35A3        | -0.215924556 | 7.949248643 | 0.003815809 |
| EAR4           | -0.13465159  | 7.782067856 | 0.003819679 |
| MAP3K7IP2      | 0.26939833   | 7.593298753 | 0.003830144 |
| PEX7           | 0.743019202  | 10.7157239  | 0.003830144 |
| ADH1           | -0.217787529 | 7.982090797 | 0.003830144 |
| LOC100048615   | -2.361195503 | 10.0019731  | 0.003831794 |
| LST1           | 0.141534371  | 7.574594695 | 0.003834588 |
| ARL6IP5        | 0.376700696  | 8.002424196 | 0.003844482 |
| LOC100045737   | 0.458167638  | 8.743898002 | 0.003845483 |
| LITAF          | 0.347859997  | 8.199374577 | 0.003845483 |
| CYP27A1        | 0.57229239   | 11.69555843 | 0.003847302 |
| DIDO1          | -1.476484077 | 9.409910085 | 0.003847994 |
| CALU           | -0.160903429 | 7.872572327 | 0.003847994 |
| CTNNAL1        | 0.271476995  | 9.0439885   | 0.003849089 |
| SLC26A6        | 0.462443806  | 8.686866587 | 0.003849089 |
| VEZF1          | -1.63509362  | 10.58514392 | 0.003859348 |
| SIDT1          | -0.304010525 | 8.959759892 | 0.003862512 |
| QDPR           | 0.397690484  | 8.369158935 | 0.003863971 |
| 2010110P09RIK  | -0.625566094 | 9.086499028 | 0.003874488 |
| CCDC92         | -0.646532003 | 8.6723571   | 0.003890496 |
| FSTL1          | 0.403399558  | 7.88491533  | 0.003890496 |
| MGAT1          | 0.345203037  | 7.870296547 | 0.003890496 |
| H2-K1          | -0.134704546 | 7.903927406 | 0.003893199 |
| 9330186A19RIK  | -0.833445101 | 10.16148428 | 0.003936228 |
| LYVE1          | 0.337754328  | 8.075241272 | 0.003936912 |
| CPE            | 0.510770353  | 7.989047368 | 0.003937472 |
| WDR7           | 0.885983775  | 9.261456499 | 0.003941286 |
|                | -0.154710236 | 7.905491794 | 0.003941753 |

|                 |              |             |             |
|-----------------|--------------|-------------|-------------|
| RASSF5          | 0.285162595  | 8.103700513 | 0.003970917 |
| TCEB3           | 0.301460247  | 8.327026538 | 0.003970917 |
| LAS1L           | 0.204662671  | 7.644314955 | 0.003978226 |
| UBL4            | 0.456254322  | 9.422177091 | 0.003999444 |
| OBFC2A          | 0.247478283  | 7.800907028 | 0.004003586 |
| PCCA            | -0.207395451 | 7.934821145 | 0.004003586 |
| AW124722        | -0.134114099 | 7.649974034 | 0.00400929  |
| CCR5            | 0.149360022  | 7.583837599 | 0.004018955 |
| LOC675228       | 0.283177283  | 12.14352047 | 0.004032622 |
| TROVE2          | 0.209523795  | 8.037380923 | 0.004032622 |
| ALDH4A1         | -1.585986677 | 9.853754596 | 0.004062763 |
| RRAD            | 0.128669601  | 7.591776568 | 0.004066643 |
| CCBP2           | 0.437277273  | 7.872967326 | 0.004083709 |
| LOC100048721    | 0.721971989  | 9.726825696 | 0.004083709 |
| 2610304F08RIK   | 0.195524162  | 7.594429182 | 0.004093374 |
| OSGEP           | -0.335712902 | 9.256740331 | 0.004118285 |
| PSAT1           | 0.937671377  | 8.562447289 | 0.004123396 |
| 9530058B02RIK   | -0.264582288 | 8.402917173 | 0.004126816 |
| FEZ2            | -0.441992571 | 9.323901896 | 0.004130742 |
| NDUFS3          | -0.427331872 | 10.57648206 | 0.004130742 |
| PRKD3           | 0.205428831  | 8.304211994 | 0.004133992 |
| LOC668837       | -0.416559081 | 8.499800404 | 0.004140587 |
| TRAPPC6A        | -0.298683215 | 8.319213354 | 0.004140587 |
| SLC38A2         | 0.368079764  | 9.158197756 | 0.004142431 |
| SLC47A1         | -0.228494549 | 7.723159039 | 0.004149758 |
| PRSS8           | 0.751388947  | 8.798474555 | 0.004153193 |
| SCARA5          | 0.216532926  | 7.622900915 | 0.004154842 |
| RIPK3           | 0.507793389  | 8.45618209  | 0.004158831 |
| HSP90AA1        | 0.229955171  | 8.16537354  | 0.004161246 |
| CXCL9           | 1.041892478  | 8.153557127 | 0.004177151 |
| 0910001L09RIK   | -0.302669467 | 11.31956562 | 0.004181756 |
| EEF1G           | 0.243284117  | 13.20614575 | 0.004188613 |
| TBC1D9          | 0.182044205  | 7.744410068 | 0.004193319 |
| AK3L1           | 0.245689157  | 7.68656733  | 0.00421365  |
| PDK1            | -0.233411526 | 7.958214181 | 0.00421365  |
| PIPOX           | -0.357833334 | 7.792256925 | 0.00421365  |
| B430105G09RIK   | 0.140082847  | 7.720180816 | 0.004223892 |
| 6030495B01RIK   | -0.422330509 | 8.36119186  | 0.004224384 |
| A130052C08RIK   | 0.259237916  | 8.009610909 | 0.004224384 |
| FOXA3           | 0.596477999  | 10.11578638 | 0.004224384 |
| SCL0003300.1_40 | 0.179767551  | 7.610021333 | 0.004224384 |
| TTC3            | -0.329041378 | 8.625679476 | 0.004224384 |
| BIRC2           | -0.271042791 | 8.495776443 | 0.004226936 |
| AKAP9           | -0.786466087 | 9.620924346 | 0.004234624 |
| EIF3D           | 0.454356063  | 11.50094702 | 0.004236395 |
| 5430417L22RIK   | 0.721904149  | 9.504551803 | 0.004236797 |
| LOC100043986    | 0.254347063  | 8.192795033 | 0.00424534  |
| DOLK            | -0.273191074 | 9.035645335 | 0.00424663  |
| COX7A2          | -0.60863527  | 8.5264783   | 0.004250413 |
| GNA14           | 0.266250248  | 7.703835921 | 0.004261587 |
| HIPK3           | 0.132834957  | 7.625398434 | 0.004261587 |
| LYPLA2          | 0.419397233  | 12.29874539 | 0.004261587 |
| TMEM100         | 0.176608868  | 7.725691497 | 0.00426547  |
| 2010003K11RIK   | -1.044428693 | 9.814700313 | 0.004266734 |
| REL             | 0.111046107  | 7.573028854 | 0.004266734 |
| ACD             | 0.363830342  | 9.094070154 | 0.004270666 |
| RDM1            | 0.970530807  | 9.181225981 | 0.00427083  |
| BAG3            | 0.614433419  | 10.57498103 | 0.004275024 |

|                  |              |             |             |
|------------------|--------------|-------------|-------------|
| PTGS1            | 0.144382522  | 7.696905115 | 0.004275616 |
| LOC382691        | 0.096347437  | 7.982978855 | 0.004285949 |
| TTC7             | -0.318688215 | 8.032943386 | 0.004295799 |
| SCAMP3           | -0.182723027 | 8.174015041 | 0.004298111 |
| B3GNT8           | 0.155396607  | 7.735709595 | 0.004325855 |
| BRD7             | -0.233867209 | 8.453823644 | 0.004334128 |
| A330042I21RIK    | -0.487119785 | 7.953547743 | 0.004343862 |
| 1190002F15RIK    | -0.16642963  | 7.705036644 | 0.004348157 |
| NDUFV1           | -0.478197866 | 12.32045892 | 0.004359265 |
| UBE1L            | -1.185220149 | 11.07358377 | 0.004370238 |
| SEMA4A           | -0.737918632 | 12.47001569 | 0.004374887 |
| IRAK1            | 0.15503417   | 8.018070467 | 0.004384097 |
| DAG1             | -0.442240358 | 9.497158339 | 0.004389951 |
| TUBA8            | 0.174727489  | 7.678620086 | 0.004389951 |
| ZFP385A          | -0.23130788  | 7.767880508 | 0.004389951 |
| CNOT10           | -0.25223863  | 8.605953935 | 0.00439018  |
| SLC34A2          | -1.137754899 | 8.332129812 | 0.004398531 |
| CYB561D1         | -0.255754332 | 8.182753201 | 0.004399584 |
| PABPN1           | 0.415859386  | 10.92639794 | 0.004404398 |
| LOC632684        | -0.297091156 | 9.561175379 | 0.00442356  |
| HLX              | 0.164981812  | 7.777987071 | 0.004426307 |
| CCDC80           | 0.48796031   | 8.080603725 | 0.004435126 |
| CALML4           | -0.31876208  | 11.83310645 | 0.004447824 |
| GDA              | -0.168289043 | 7.748395959 | 0.004447824 |
| SNX11            | 0.376751482  | 9.372238399 | 0.004450215 |
| DDAH2            | 0.139255059  | 7.748869189 | 0.004458211 |
| 2310006M14RIK    | 0.452083217  | 7.990772196 | 0.004467908 |
| OXR1             | 0.179353261  | 8.243009416 | 0.004501163 |
| BBS5             | 0.232735637  | 8.015534986 | 0.004504192 |
| IFT140           | -0.143524282 | 7.9747321   | 0.004504192 |
| UGT2B35          | -0.383468842 | 7.924459647 | 0.004505602 |
| NEK8             | 0.135764717  | 7.880461203 | 0.004506906 |
| DHRS9            | 0.106546132  | 7.566508211 | 0.004512796 |
| RASAL2           | 0.494682404  | 8.223253803 | 0.004515056 |
| DOS              | 0.130067976  | 7.724919103 | 0.004524705 |
| WSB1             | 0.323994595  | 10.02156742 | 0.004524705 |
| 2610020O08RIK    | -0.187473411 | 8.501878509 | 0.004543312 |
| NDUFA5           | -0.534089957 | 9.927864301 | 0.0045456   |
| SCNM1            | -0.179813701 | 8.116841535 | 0.004549065 |
| GTF2F2           | 0.528011406  | 10.21360927 | 0.004557833 |
| BC057079         | 0.213661506  | 8.143767043 | 0.004569098 |
| GPR108           | 0.326384039  | 8.646333935 | 0.004595013 |
| TIA1             | -0.086758186 | 7.768228978 | 0.004599688 |
| TMEM126B         | -0.23710779  | 8.106625785 | 0.004612601 |
| 2610003J06RIK    | -0.562952382 | 8.64064394  | 0.004616486 |
| LOC100044430     | 0.197694858  | 7.743402418 | 0.004616486 |
| RFTN1            | 0.161422446  | 7.653836052 | 0.004616486 |
| CSRNP2           | 0.558604008  | 8.293272558 | 0.00461958  |
| HAGHL            | 0.32615658   | 8.32935084  | 0.004623652 |
| UBQLN1           | -0.27068072  | 9.593926678 | 0.004650215 |
| PELI1            | -0.253658757 | 8.575963542 | 0.004660197 |
| PSME1            | -0.765395294 | 11.88379863 | 0.004681761 |
| SCL0002617.1_582 | -0.534400309 | 11.02914625 | 0.004692754 |
| 4921531D08RIK    | -0.150407297 | 7.741331071 | 0.004707184 |
| 6030429G01RIK    | 0.166123681  | 7.630695153 | 0.004707184 |
| ILF2             | 0.230213382  | 9.226492743 | 0.004707184 |
| OTUD3            | 0.298345167  | 8.226607921 | 0.004707184 |
| MGP              | 1.062165741  | 9.16950774  | 0.004735093 |

|               |              |             |             |
|---------------|--------------|-------------|-------------|
| SERGEF        | 0.156578792  | 7.907791451 | 0.004735421 |
| 2810043G13RIK | 0.474370887  | 7.894891095 | 0.004741527 |
| HSD11B1       | 0.948233907  | 8.127803346 | 0.004747489 |
| MIER3         | -0.254800952 | 8.660581497 | 0.004747489 |
| CASP9         | -0.305427785 | 8.193705235 | 0.004765144 |
| IFITM3        | 1.30998002   | 11.89826148 | 0.004765144 |
| R3HDM2        | -0.130928238 | 7.829351393 | 0.004784763 |
| TAPT1         | 0.278308115  | 10.33457794 | 0.00478661  |
| TUSC4         | -0.345677389 | 8.952673399 | 0.004791128 |
| DCN           | 0.523830761  | 10.44988908 | 0.004799273 |
| POLR1E        | 0.280016     | 8.322515694 | 0.004818611 |
| SORD          | -1.142446589 | 8.765747599 | 0.004821954 |
| A930002H24RIK | 0.113236528  | 7.591994678 | 0.004823675 |
| ZER1          | -0.339361357 | 9.313795218 | 0.004827693 |
| PUS7L         | 0.162746127  | 8.360823631 | 0.004840658 |
| ATXN1         | -0.489047542 | 8.466753338 | 0.004842627 |
| BEAN          | 0.140952503  | 7.567646565 | 0.004850379 |
| GATA2         | 0.433833241  | 7.809463674 | 0.004850379 |
| NCF4          | 0.545753657  | 8.095725289 | 0.004851014 |
| RASL2-9       | -0.115959897 | 7.661433608 | 0.004852266 |
| 9430090I01RIK | -0.11791544  | 7.721663013 | 0.004859905 |
| MYO5B         | -0.273371395 | 9.737525088 | 0.004866602 |
| TNNC1         | 0.178064818  | 7.699777868 | 0.004866602 |
| NDUFB9        | -0.356299331 | 8.351665088 | 0.004888795 |
| 0710007G10RIK | -0.14862303  | 7.831612638 | 0.004890534 |
| P2RY1         | -0.492169232 | 9.037656432 | 0.004898512 |
| SYRADB        | -0.234521895 | 8.014260507 | 0.004903928 |
| FASTKD5       | -0.222520677 | 9.131254847 | 0.004924019 |
| KLHL6         | 0.58736688   | 8.122721469 | 0.004941418 |
| NAT12         | -0.129168612 | 8.225409709 | 0.00495439  |
| TEK           | 0.185549238  | 7.718216952 | 0.004964093 |
| THOC7         | -0.569333149 | 10.99561373 | 0.004977517 |
| HDAC7         | 0.185702525  | 7.687044618 | 0.004979884 |
| 2610024B07RIK | 0.569784253  | 8.40967217  | 0.005000706 |
| FRMD8         | -0.170241559 | 7.984087275 | 0.005000706 |
| SMPDL3A       | -0.896738127 | 9.560569112 | 0.005026078 |
| ZEB1          | 0.247818258  | 7.970288331 | 0.005026078 |
| COPA          | -0.363630506 | 11.43736164 | 0.005036466 |
| LOC100044968  | 0.405551303  | 8.400219594 | 0.005037886 |
| 2810026P18RIK | 0.629798147  | 8.138338752 | 0.005047313 |
| SH3YL1        | 0.693497151  | 10.33283727 | 0.005047368 |
| BC027231      | 0.131110201  | 7.793394552 | 0.005060262 |
| LOC245069     | -0.981172913 | 8.764546207 | 0.005088609 |
| 2310046K01RIK | -0.948088487 | 11.91239927 | 0.005092078 |
| CCS           | -0.621996257 | 10.17959667 | 0.005092078 |
| DYNC1I2       | 0.286755754  | 10.74870206 | 0.005092078 |
| NDUFA3        | -0.666880897 | 12.63726292 | 0.005092078 |
| NME3          | -0.42648817  | 8.972535271 | 0.005092078 |
| RPAIN         | 0.229291951  | 8.200372857 | 0.005092078 |
| CAR4          | -1.668347027 | 9.899774134 | 0.005113807 |
| EPS15-RS      | -0.141199779 | 8.063501948 | 0.005113807 |
| UBR2          | 0.108508615  | 7.69384583  | 0.005113807 |
| POMP          | -0.366014583 | 12.4085387  | 0.00511529  |
| SPC24         | -0.251606801 | 8.025310209 | 0.005117463 |
| FOXF1A        | 0.149066808  | 7.784926445 | 0.005122702 |
| EDN1          | 0.584188151  | 8.14074296  | 0.005123249 |
| RPL3L         | 0.124558066  | 7.630668176 | 0.005123249 |
| KLHL7         | 0.142480559  | 7.962137745 | 0.005140382 |



|               |              |             |             |
|---------------|--------------|-------------|-------------|
| A730054J21RIK | 0.243795092  | 7.744159061 | 0.005145881 |
| PSD4          | 0.275800805  | 7.974123006 | 0.005156044 |
| LOC638892     | -0.339232911 | 8.315702516 | 0.005161297 |
| MCM10         | -0.273798165 | 8.46731559  | 0.005161297 |
| HIST1H2AI     | -0.886465976 | 13.10307419 | 0.005162773 |
| D9WSU20E      | -0.371860567 | 8.361378457 | 0.005169404 |
| MGAM          | -1.245787122 | 13.10384784 | 0.005171044 |
| ZHX2          | -0.228961166 | 7.821613219 | 0.005173991 |
| HSDL1         | -0.196964759 | 8.310357205 | 0.005188052 |
| D5ERTD579E    | -0.378204009 | 8.602672636 | 0.005220203 |
| GRINA         | -0.882918783 | 13.29482246 | 0.005220203 |
| KPTN          | -0.158687332 | 8.098429683 | 0.005220203 |
| AHCTF1        | 0.378681947  | 9.044135799 | 0.00522782  |
| LOC381222     | -0.222435406 | 7.640966921 | 0.00522782  |
| APOA1BP       | -0.354614994 | 8.540326404 | 0.00524397  |
| ALDH1A7       | -0.877745816 | 8.37549348  | 0.005247252 |
| PPP2CA        | 0.470206691  | 12.68091079 | 0.005251507 |
| ADAM8         | 0.102947734  | 7.605161007 | 0.005267186 |
| JAKMIP1       | -0.550426749 | 9.170091825 | 0.00528408  |
| SLC9A3R1      | -1.138629845 | 13.19030715 | 0.005286246 |
| MRPS31        | -0.488535754 | 9.646411854 | 0.005288743 |
| KDEL3         | 0.859874436  | 9.073191492 | 0.005291189 |
| UBAP1         | -0.231176218 | 9.034672697 | 0.005294871 |
| GTPBP8        | -0.136332996 | 7.771979448 | 0.005308257 |
| SLC30A2       | -0.921339223 | 9.852049578 | 0.005313483 |
| SNF8          | -0.330910022 | 8.56040357  | 0.005327898 |
| EPB4.1L4A     | 0.103673499  | 7.67974416  | 0.005337115 |
| NSUN4         | -0.590403124 | 9.639091343 | 0.005347273 |
| PET112L       | -0.133808131 | 7.773500754 | 0.005351982 |
| LOC270152     | 0.702724949  | 8.141284054 | 0.005354181 |
| CAPN5         | 0.524596596  | 8.638861448 | 0.005356491 |
| KYNU          | 0.175977025  | 7.665200522 | 0.005356491 |
| RAP2A         | 0.173930125  | 7.894041933 | 0.005356491 |
| RPAP1         | -0.152843787 | 7.860467889 | 0.005356491 |
| RSAD1         | 0.277021958  | 7.798281601 | 0.005356491 |
| ZFP219        | 0.360129268  | 8.827605083 | 0.005410527 |
| LOC100048083  | 0.204832626  | 7.898748513 | 0.005414595 |
| GAA           | 0.224677064  | 8.208914563 | 0.005417554 |
| PLEKHO2       | 0.367394053  | 8.177471713 | 0.005417554 |
| EDF1          | -0.427259766 | 12.11641641 | 0.005421244 |
| SCHIP1        | 0.196426832  | 7.867051953 | 0.005422128 |
| 6720458D17RIK | 0.590552112  | 8.333877625 | 0.005422876 |
| BCAP31        | -0.361130512 | 9.284560025 | 0.005422876 |
| DDIT4L        | 0.459893958  | 8.076493421 | 0.005428405 |
| SNAP29        | -0.41558411  | 9.038906579 | 0.005428405 |
| XRCC6         | -0.293333527 | 8.663699458 | 0.005448881 |
| APPL1         | 0.419209679  | 8.816117275 | 0.0054707   |
| A930039N10RIK | -0.144799694 | 7.736780551 | 0.005495854 |
| TLR2          | 0.283927336  | 7.806129398 | 0.005497319 |
| HMG3          | 0.29697009   | 8.323977901 | 0.005503699 |
| SEC13         | -0.406291543 | 12.81508347 | 0.005503699 |
| 1600014C10RIK | -0.138227368 | 7.673879157 | 0.005506402 |
| LOC233637     | 0.457277128  | 10.08217575 | 0.005506402 |
| SFRS7         | -0.433929494 | 8.144241472 | 0.005534302 |
| 4632417K18RIK | 0.47490638   | 8.296277518 | 0.005541356 |
| ALDOB         | -1.1382987   | 11.35141857 | 0.005541632 |
| AVPR1A        | 0.311723108  | 7.803323357 | 0.005556951 |
| DSG2          | 0.334990401  | 10.11372401 | 0.005572241 |

|                 |              |             |             |
|-----------------|--------------|-------------|-------------|
| SDAD1           | -0.518278378 | 8.855866925 | 0.005572593 |
| 5730589K01RIK   | 0.258652662  | 8.773302606 | 0.005573079 |
| NR1D1           | -0.40407666  | 8.011184764 | 0.005584171 |
| EG237009        | 0.389397961  | 7.701857178 | 0.005590802 |
| UNC84B          | 0.32897862   | 8.562634416 | 0.005598259 |
| GALNT3          | 0.285462165  | 7.811006494 | 0.005609551 |
| C230078M08RIK   | -0.367534343 | 8.092734953 | 0.005612645 |
| MDM2            | 0.648854894  | 9.699218531 | 0.005629015 |
| SPPL3           | -0.592997186 | 9.744731395 | 0.005636268 |
| FASTK           | -0.292990462 | 8.361254732 | 0.005638997 |
| UBE2M           | 0.342408454  | 8.966549639 | 0.005642925 |
| NHLRC1          | -0.156828817 | 8.011251857 | 0.005646046 |
| SCL0001419.1_32 | 0.130881565  | 7.57313119  | 0.005655356 |
| FUT2            | 2.296208559  | 9.025054476 | 0.005667214 |
| CYB5R3          | -0.812780795 | 10.23102658 | 0.005678421 |
| SUHW2           | -0.103599292 | 7.795138262 | 0.005678421 |
| NFIB            | -0.143661721 | 8.006906025 | 0.005681664 |
| USP24           | 0.196117324  | 8.699824294 | 0.005681664 |
| FLT1            | 0.76665227   | 8.317724721 | 0.005690181 |
| TMEM204         | 0.458749774  | 8.427334524 | 0.005694233 |
| BLVRA           | -0.528720118 | 9.901061651 | 0.005717121 |
| ANXA8           | 0.28243463   | 7.703560575 | 0.0057219   |
| H1F0            | -0.464095753 | 8.177192022 | 0.0057219   |
| RAB32           | 0.618706221  | 9.413041095 | 0.0057219   |
| TNFRSF18        | 0.11120922   | 7.597802256 | 0.0057219   |
| CCDC101         | 0.338957212  | 8.545831336 | 0.00572247  |
| SPINK4          | 1.402101437  | 13.42899132 | 0.00572247  |
| ATP5D           | -0.420928386 | 11.49452071 | 0.005724166 |
| CAMTA2          | -0.757407793 | 10.523661   | 0.005724166 |
| IMP3            | 0.389483625  | 9.712715855 | 0.005724166 |
| ETHE1           | 0.530949379  | 9.214378803 | 0.005744412 |
| DYSF            | 0.184062522  | 7.667384339 | 0.005746534 |
| MRPL23          | -0.495874472 | 11.38436858 | 0.005747423 |
| SCARA3          | 0.191066263  | 7.63124852  | 0.005747423 |
| STK17B          | -0.670454514 | 10.96178137 | 0.005767182 |
| PKN2            | 0.230693874  | 8.250761767 | 0.005777654 |
| LOC624198       | -0.415330434 | 8.358736632 | 0.005777792 |
| NRAS            | 0.250167317  | 8.985262179 | 0.005784254 |
| AU042651        | 0.11476418   | 7.610515678 | 0.005794667 |
| GAL3ST1         | -0.501809299 | 9.559496699 | 0.005798399 |
| TBC1D13         | -0.566101081 | 9.669986059 | 0.00580531  |
| SLC25A37        | -0.738628241 | 9.14992657  | 0.005809379 |
| DOK2            | 0.296635374  | 7.767014772 | 0.005811876 |
| MTMR4           | -0.211740294 | 7.792874336 | 0.005815861 |
| ATP5E           | -0.238421532 | 8.052508815 | 0.005843679 |
| CDC2L6          | 0.382250168  | 8.525138079 | 0.005843679 |
| SELENBP2        | -0.514235753 | 7.971061712 | 0.005845265 |
| TSPAN6          | 0.551290059  | 7.94915503  | 0.005850974 |
| DPPA3           | 0.123135677  | 7.548938897 | 0.005856647 |
| ACAA2           | -0.651697775 | 8.925091456 | 0.005867716 |
| FLRT3           | 0.794636887  | 10.26526876 | 0.005870707 |
| E130306D19RIK   | -0.271960346 | 8.042754806 | 0.005900872 |
| D530030K12RIK   | 0.163079775  | 7.62904867  | 0.005904324 |
| PLAA            | 0.416709769  | 9.073128624 | 0.005904324 |
| UNC5B           | 0.493547876  | 8.928146476 | 0.005908546 |
| POLR2G          | 0.330260624  | 8.95556349  | 0.005918219 |
| BC087945        | 0.204155489  | 9.461051678 | 0.005929186 |
| MGAT3           | -0.710729756 | 8.484559846 | 0.005929186 |

|               |              |             |             |
|---------------|--------------|-------------|-------------|
| IVL           | 0.465782128  | 7.64657975  | 0.005936012 |
| BC031181      | -0.293200147 | 10.96609653 | 0.005961313 |
| TTC4          | -0.331490018 | 8.233780087 | 0.006008795 |
| 3830406C13RIK | -0.175558678 | 8.082215229 | 0.006012025 |
| TARS2         | -0.169755122 | 8.077509379 | 0.006014801 |
| TCRG-V4       | -0.30226417  | 7.758680701 | 0.006023446 |
| UHRF1BP1L     | 0.228024197  | 8.606826111 | 0.006030168 |
| DDC           | -0.998401778 | 9.389875582 | 0.006031954 |
| PRMT5         | 0.276171721  | 8.525754229 | 0.006045037 |
| RAB19         | -0.449699933 | 7.959268092 | 0.006046294 |
| PRSS12        | 0.269193652  | 7.67497502  | 0.006058694 |
| IDH2          | -0.528792219 | 8.571395174 | 0.006068358 |
| CDA           | -1.028328887 | 10.15054582 | 0.006069784 |
| PEF1          | -0.34577444  | 9.818079189 | 0.006076814 |
| APOA4         | -0.895327952 | 15.21208    | 0.00608756  |
| FOXP1         | 0.161162699  | 7.832137179 | 0.00608756  |
| SYP           | 0.281357236  | 7.997442497 | 0.00608756  |
| TRAF4         | 0.191284468  | 8.199374969 | 0.006104088 |
| HGF           | 0.441643615  | 7.757745003 | 0.00610915  |
| SLC7A3        | 0.110560253  | 7.656681186 | 0.00611102  |
| ATP5B         | -0.517176298 | 14.63368607 | 0.006145677 |
| LOC100047427  | -0.734967809 | 8.727102568 | 0.006145677 |
| RFXAP         | 0.315595074  | 8.899459035 | 0.006145677 |
| LEMD2         | 0.355251011  | 10.45255447 | 0.0061486   |
| ACSM5         | -0.210843366 | 7.648857428 | 0.006154008 |
| EG244911      | 1.637072857  | 8.968296886 | 0.006154008 |
| XPO6          | 0.348358453  | 9.147004659 | 0.006154513 |
| TMEM201       | -0.15140727  | 7.893398378 | 0.006160804 |
| PACS1         | 0.173304907  | 7.884152041 | 0.006197767 |
| AI413782      | -0.127584787 | 7.771942534 | 0.006200528 |
| EG622320      | -0.150192727 | 7.756718036 | 0.006200528 |
| RAPGEF4       | 0.135751521  | 7.615730701 | 0.006200528 |
| SPIRE2        | 0.239455868  | 8.792319048 | 0.006200528 |
| LOC545481     | 0.099387633  | 7.60525142  | 0.006202662 |
| UBP1          | -0.322009039 | 8.371744161 | 0.006208357 |
| ADAMTS15      | 0.259654287  | 7.860630929 | 0.006225978 |
| B230205C01RIK | -0.128830777 | 7.912119446 | 0.006225978 |
| CCRK          | 0.147200957  | 7.694921878 | 0.006225978 |
| TEX264        | -0.291293171 | 8.702413219 | 0.006225978 |
| CHMP7         | -0.190553663 | 8.827637928 | 0.006232639 |
| 1500032D16RIK | -0.581242349 | 11.19013777 | 0.006252488 |
| ADIPOR2       | -0.81071415  | 11.56432682 | 0.006295435 |
| TXNL4A        | 0.433060705  | 9.445863013 | 0.006299044 |
| UNC84A        | -0.282696905 | 8.09750992  | 0.006299044 |
| SREBF2        | 0.389504128  | 8.518713803 | 0.006308343 |
| DNCLC1        | 0.385863632  | 8.296167426 | 0.006312264 |
| DTX4          | 0.195874983  | 7.972329252 | 0.006312264 |
| CNOT3         | -0.115294626 | 7.933205882 | 0.006327276 |
| 2900006A08RIK | 0.365126856  | 9.085967096 | 0.006349915 |
| CUBN          | -0.836519074 | 7.987810187 | 0.006357898 |
| KRCC1         | -0.389344953 | 8.613802274 | 0.006370418 |
| PCBP4         | 0.428311675  | 8.478539407 | 0.006370418 |
| SEMA3B        | -0.21356114  | 7.80515065  | 0.006370418 |
| CCT8          | 0.333328251  | 10.00340085 | 0.006372062 |
| TMEM178       | 0.135134002  | 7.625567683 | 0.006390312 |
| PXMP2         | 0.197142852  | 7.68073978  | 0.00639553  |
| LYSMD2        | 0.145272492  | 7.641495395 | 0.006397033 |
| ELMOD3        | -0.112317763 | 7.717459429 | 0.006415698 |

|                    |              |             |             |
|--------------------|--------------|-------------|-------------|
| LOC218963          | -0.273438508 | 14.71022269 | 0.006428335 |
| ENSMUSG00000074822 | -0.118986313 | 7.747270369 | 0.006441013 |
| A530050D06RIK      | -0.28952147  | 7.86772725  | 0.006462595 |
| NIN                | 0.080914526  | 7.660664221 | 0.006462595 |
| MGL1               | 0.196866693  | 7.634704237 | 0.00646735  |
| 4933407N01RIK      | -0.290755185 | 9.235694708 | 0.006472157 |
| EIF2B3             | 0.445603681  | 8.76959542  | 0.006482944 |
| RPL22              | -0.419992839 | 8.417882273 | 0.006485695 |
| 4632413C10RIK      | -0.414513796 | 8.623760862 | 0.006491717 |
| 2900073G15RIK      | 0.213473572  | 7.954194808 | 0.006519925 |
| ENSMUSG00000054212 | -0.294721863 | 8.35674766  | 0.006519925 |
| HERC2              | -0.28692208  | 8.773017471 | 0.006519925 |
| LOC381140          | 0.849516526  | 9.794953368 | 0.006519925 |
| SARS               | 0.324335423  | 8.716283659 | 0.006519925 |
| TUBB5              | 0.666509959  | 10.33523858 | 0.006519925 |
| 4833431D13RIK      | 0.141693738  | 7.529555724 | 0.006521453 |
| DRBP1              | -0.313184107 | 9.551229183 | 0.006541066 |
| 2510009E07RIK      | 0.255504713  | 7.950120698 | 0.006578713 |
| PMP22              | -1.629637547 | 10.75089301 | 0.006581207 |
| RAB5A              | 0.378147367  | 8.747749905 | 0.006585309 |
| LOC237877          | -0.147848404 | 7.897616356 | 0.006589083 |
| SLC3A2             | -0.235292543 | 7.757292335 | 0.006590021 |
| 2010003H20RIK      | -0.167181495 | 7.798643345 | 0.006591388 |
| 5730596K20RIK      | 0.214942345  | 7.930225967 | 0.006591388 |
| HNF4G              | -0.304271458 | 7.879363274 | 0.006591388 |
| XYLB               | -0.118249612 | 7.701262525 | 0.006594656 |
| NDUFB8             | -0.356482693 | 11.38731098 | 0.00665105  |
| 9330155C01RIK      | -0.287464793 | 8.599624211 | 0.00665158  |
| HRMT1L2            | 0.556953247  | 10.43722519 | 0.006654319 |
| IRAK3              | 0.227608348  | 7.935577184 | 0.006665953 |
| BFAR               | -0.291863675 | 8.262028571 | 0.006671698 |
| 2600009E05RIK      | -0.321710949 | 11.0929963  | 0.006674223 |
| ERCC5              | 0.328144837  | 8.748189382 | 0.006674781 |
| NEU1               | 0.970745478  | 11.91697397 | 0.006706038 |
| TLE4               | -0.401791772 | 9.398223019 | 0.006708432 |
| PROS1              | 0.722881109  | 9.436347709 | 0.006719076 |
| LYPD3              | 0.314085376  | 7.672387025 | 0.006720504 |
| TAGAP1             | 0.155875305  | 7.827942557 | 0.006730905 |
| ADFP               | 0.602976387  | 8.497378512 | 0.006759096 |
| TXN2               | -0.343370145 | 8.932151572 | 0.006764321 |
| NFKBIA             | 0.892854908  | 9.136281956 | 0.00676681  |
| SPHK1              | 0.909469649  | 9.269717781 | 0.00676681  |
| SULT1D1            | -1.008118541 | 9.250501451 | 0.006771622 |
| 0610037L13RIK      | 0.246106579  | 8.642349692 | 0.006781233 |
| 9030605E16RIK      | -0.246256221 | 7.975570481 | 0.006781233 |
| LGSN               | -0.493618361 | 8.197692076 | 0.006804539 |
| 1700019G17RIK      | -0.546200389 | 8.654443448 | 0.006804543 |
| ABHD14A            | -0.217538675 | 7.733970955 | 0.006804543 |
| PSMC4              | 0.378996035  | 10.64600451 | 0.006815513 |
| GKN2               | 0.266762356  | 7.586289567 | 0.00684094  |
| HIST1H2AO          | -0.986768337 | 13.75262111 | 0.00684094  |
| PHF5A              | -0.165338645 | 11.46621535 | 0.00684094  |
| HYI                | -0.753400333 | 9.855765776 | 0.00686394  |
| UBE2L3             | -0.640442658 | 10.77113317 | 0.00686394  |
| SCAVENGER RECEPTOR | 0.125555903  | 7.61559749  | 0.006900418 |
| LOC100048537       | 0.272620989  | 7.92356232  | 0.006907559 |
| SUDS3              | -0.529402892 | 11.02438113 | 0.006926878 |
| CCL24              | 0.329234702  | 7.747199051 | 0.006952526 |

|               |              |             |             |
|---------------|--------------|-------------|-------------|
| LOC100046483  | 0.172387087  | 8.701526394 | 0.00696275  |
| EIF3I         | 0.224706888  | 12.18566107 | 0.006966891 |
| FLII          | 0.201127101  | 9.131983316 | 0.006966891 |
| ABHD6         | -0.182398588 | 7.748184311 | 0.006968593 |
| B230114H05RIK | 0.205031571  | 7.719539941 | 0.006968593 |
| BC025458      | 0.159105959  | 7.708091795 | 0.006988389 |
| C330018D20RIK | -0.203470155 | 7.879310748 | 0.006997539 |
| HIPK2         | -0.19215463  | 7.97815549  | 0.007020732 |
| LOC382735     | -0.093007704 | 7.713903826 | 0.007041349 |
| MCF2L         | -0.130480927 | 7.960516661 | 0.007048439 |
| LOC381330     | 0.359163396  | 11.67629413 | 0.007055789 |
| ZFP791        | 0.203966833  | 7.67043333  | 0.007059531 |
| E030038D23RIK | -0.394085175 | 8.397352344 | 0.007076798 |
| NARF          | -0.335090183 | 7.901156247 | 0.007085263 |
| MRPL33        | 0.293523793  | 11.38367676 | 0.007094513 |
| A830080H07RIK | 0.386614562  | 8.115790502 | 0.007108282 |
| HMGCR         | 0.273255108  | 7.968838289 | 0.007108282 |
| PTPRB         | 0.737571216  | 8.300272008 | 0.007108282 |
| 9930039L23RIK | 0.183838825  | 7.894441268 | 0.007141722 |
| A630020I15RIK | -0.105939578 | 7.749474639 | 0.007154086 |
| TNRC6C        | -0.295480777 | 8.295746853 | 0.00716677  |
| 3110001O07RIK | -0.239851679 | 8.211178361 | 0.007177373 |
| NEDD9         | -0.727583186 | 9.713677603 | 0.007190942 |
| DPP8          | -0.231520531 | 8.868946908 | 0.007196451 |
| KIF11         | -0.150698507 | 7.670022076 | 0.00719885  |
| PMF1          | -0.19169541  | 7.874639971 | 0.007224024 |
| D230040N21RIK | -0.156490518 | 7.620158012 | 0.007239776 |
| BC028528      | 0.237046821  | 7.697001708 | 0.007259932 |
| AADAACL1      | 0.489207657  | 9.165400594 | 0.007261375 |
| NUDT8         | 0.273352175  | 8.835497772 | 0.007277678 |
| BC017612      | -0.260759944 | 7.900920772 | 0.00727838  |
| RAVER1        | -0.205056826 | 7.831495038 | 0.00727838  |
| LOC100044948  | 0.874335442  | 9.478834299 | 0.007280683 |
| ATP2B1        | 0.197795048  | 8.032416044 | 0.007281643 |
| 2310038D14RIK | -0.190813713 | 8.032162222 | 0.007286323 |
| ERRFI1        | 1.308318935  | 11.27325707 | 0.007290254 |
| MYO1C         | 0.114294829  | 7.681513481 | 0.007323995 |
| HS6ST1        | 0.503006628  | 9.053389304 | 0.007325712 |
| CUL5          | -0.182156278 | 8.256750363 | 0.007336075 |
| BCAP29        | 0.533411639  | 8.515517794 | 0.00733903  |
| CTSS          | -0.174132198 | 7.87160263  | 0.00733903  |
| SLC4A4        | -0.75526492  | 9.431641889 | 0.00733903  |
| ZFP1          | 0.146332311  | 7.754932751 | 0.00733903  |
| MYO10         | 0.165445753  | 7.709832417 | 0.0073429   |
| 9530064J02    | 0.195632491  | 10.19158029 | 0.007351873 |
| SOX4          | 0.384722837  | 7.924096013 | 0.007363394 |
| NDUFA13       | -0.563217856 | 13.36933847 | 0.007368455 |
| TMED4         | -0.564395353 | 10.18564616 | 0.007376789 |
| MGRN1         | -0.406036303 | 11.42730852 | 0.007410582 |
| A930004K21RIK | 0.104247713  | 7.602209215 | 0.007441445 |
| ITGA9         | 0.190402166  | 7.705404808 | 0.007445912 |
| CXCL16        | 0.991320749  | 9.795094801 | 0.007456717 |
| DSP           | 0.24499277   | 8.475466725 | 0.007456717 |
| SLC38A8       | -0.340223131 | 7.819786824 | 0.007456717 |
| LRRC45        | -0.117110536 | 7.826473453 | 0.007459313 |
| TNFRSF21      | 0.68149988   | 9.062633597 | 0.007459313 |
| ZBTB24        | -0.469452766 | 8.737149091 | 0.007470509 |
| ATP9A         | -0.288295508 | 8.456954548 | 0.007499526 |

|                |              |             |             |             |
|----------------|--------------|-------------|-------------|-------------|
| TYKI           | -1.696414755 | 10.40527546 | 0.007499526 |             |
| CMTM6          | -0.438684105 | 9.878075498 | 0.007508639 |             |
| RHOX5          | 0.128867907  | 7.625242468 | 0.007524965 |             |
| DDT            | -0.165827734 | 7.906772606 | 0.007551407 |             |
| A230005G17RIK  | 0.129967219  | 7.674673783 | 0.007575018 |             |
| RASL11B        | 0.34737228   | 8.117261229 | 0.007595547 |             |
| BAT1A          | -0.224938333 | 10.34251318 | 0.007622876 |             |
| 1700047117RIK1 | 0.844461597  | 8.305654516 | 0.007629928 |             |
| A630078J04RIK  | -0.170883786 | 7.708625955 | 0.007639125 |             |
| CCDC23         | 0.51173148   | 8.881629144 | 0.007641603 |             |
| NDUFA12L       | -0.431688406 | 8.952086844 | 0.007642995 |             |
| NID2           | 0.163512235  | 7.65687894  | 0.007675995 |             |
|                | Sep-02       | 0.329275819 | 10.44540387 | 0.007687098 |
| NPEPL1         | -0.413982236 | 9.662035234 | 0.007687098 |             |
| ATP2C1         | 0.337549648  | 7.847076308 | 0.007688165 |             |
| PARD3B         | -0.220861576 | 7.870143288 | 0.007719565 |             |
| E030024L06RIK  | -0.321310969 | 8.485359427 | 0.007738849 |             |
| LOC639086      | -0.172861727 | 7.946814091 | 0.007738849 |             |
| DGCR2          | -0.255806589 | 8.429741276 | 0.007739128 |             |
| RHBG           | -0.531052612 | 8.025706015 | 0.007740724 |             |
| 6230401I02RIK  | 0.259339891  | 8.750791389 | 0.007747964 |             |
| C530038F07RIK  | 0.112060721  | 7.591067742 | 0.007751782 |             |
| TAPBP          | -0.222473167 | 7.936809151 | 0.007771774 |             |
| EMILIN1        | 0.138462747  | 7.679745285 | 0.007775683 |             |
| PWWP2B         | 0.220340474  | 8.350613603 | 0.007783133 |             |
| REEP3          | -0.488575246 | 10.40909561 | 0.007790086 |             |
| TSPAN4         | 0.094890151  | 7.655182484 | 0.007794225 |             |
| ERBB2IP        | -0.273127601 | 8.227294964 | 0.007797287 |             |
| 9130223C08RIK  | -0.168106531 | 7.889762786 | 0.007798234 |             |
| PTPRH          | -0.428781676 | 8.592702759 | 0.007811812 |             |
| HDAC10         | -0.157730916 | 7.792204312 | 0.007825755 |             |
| KCNV2          | 0.088520749  | 7.624544385 | 0.007825755 |             |
| B9D2           | 0.152108514  | 7.846580951 | 0.007827244 |             |
| LOC677180      | -0.145085628 | 7.878944351 | 0.007827244 |             |
| MTMR9          | 0.176287422  | 8.083457663 | 0.007829823 |             |
| 1700012H17RIK  | 0.357344538  | 8.02290858  | 0.007832846 |             |
| GTF2E1         | -0.167870042 | 8.208208977 | 0.007835973 |             |
| RPUSD3         | -0.124909803 | 7.795855984 | 0.00784315  |             |
| KLF7           | 0.6052868    | 8.977694958 | 0.007887946 |             |
| 4930470O13RIK  | -0.235642851 | 7.928556554 | 0.00789043  |             |
| E030040G24RIK  | 0.483433857  | 8.680250477 | 0.007916022 |             |
| SH3GLB2        | -0.31348037  | 9.094665682 | 0.007916022 |             |
| SMURF1         | 0.198469338  | 7.762357549 | 0.007916022 |             |
| UBE2L6         | -0.621517567 | 8.628116355 | 0.007916022 |             |
| AU020206       | 0.344585448  | 7.978029284 | 0.007917533 |             |
| DISP1          | -0.247589945 | 7.987644671 | 0.007966942 |             |
| RABGEF1        | 0.527424673  | 9.466456389 | 0.007992476 |             |
| GAS7           | 0.112412626  | 7.668201606 | 0.008034042 |             |
| TEX2           | -0.20467623  | 8.010030733 | 0.0080347   |             |
| MRPS25         | -0.131006692 | 7.83423492  | 0.008037008 |             |
| FKBP9          | 0.222584969  | 7.984468323 | 0.008072091 |             |
| BC004728       | 0.488568515  | 10.33565506 | 0.008080722 |             |
| HSD11B2        | -0.12469963  | 7.642170186 | 0.008080722 |             |
| ZBTB45         | -0.18828095  | 7.99736557  | 0.008108072 |             |
| POF1B          | -0.658750656 | 9.463436611 | 0.008130973 |             |
| 2410002F23RIK  | 0.169571357  | 7.982190554 | 0.008148009 |             |
| 2610528A11RIK  | 0.556515841  | 7.824174472 | 0.008148009 |             |
| RANGAP1        | 0.464779499  | 10.12475177 | 0.008148009 |             |

|                |              |             |             |
|----------------|--------------|-------------|-------------|
| D030022P06RIK  | -0.214162305 | 8.222441102 | 0.00817912  |
| NDUFC1         | -0.590688317 | 10.50754739 | 0.00817912  |
| ARPC2          | 0.208815384  | 10.67726366 | 0.008193604 |
| AASDH          | -0.125934247 | 7.928790855 | 0.008195617 |
| 4632417N05RIK  | -0.205509599 | 7.81125953  | 0.008227784 |
| CRIPT          | -0.27242477  | 8.554059809 | 0.008227784 |
| LOC383981      | 0.676920708  | 13.58149029 | 0.008227784 |
| LDB1           | 0.646846681  | 10.08777957 | 0.008229532 |
| BC011248       | -0.129017601 | 8.423028378 | 0.008233633 |
| SERBP1         | -0.280654794 | 10.03211788 | 0.008243368 |
| MIB1           | 0.190098181  | 7.970364185 | 0.008252095 |
| AU023871       | 0.151381363  | 7.723405134 | 0.008254337 |
| NUMA1          | -0.247112858 | 8.236596644 | 0.008275017 |
| LOC100047260   | 0.181934286  | 8.076541346 | 0.008279618 |
| PTGFRN         | 0.121176445  | 7.658370132 | 0.008301841 |
| STRBP          | -0.161726052 | 8.026396035 | 0.008307745 |
| MSN            | 0.083544486  | 7.609511366 | 0.008325665 |
| NDUFAF1        | -0.238615983 | 8.972535205 | 0.008325665 |
| CRYZL1         | -0.216983328 | 8.248460404 | 0.008326247 |
| A330057G13RIK  | -0.188294834 | 7.726212725 | 0.008329832 |
| C730009F21RIK  | -0.370419295 | 8.219759782 | 0.008331712 |
| EG382161       | -0.168285779 | 8.027550153 | 0.008331712 |
| PGC            | 0.766264007  | 7.732107962 | 0.008336558 |
| ATP5H          | -0.626697475 | 10.92708005 | 0.008336634 |
| IRX3           | 0.135692555  | 7.647130431 | 0.008348928 |
| SPINT2         | -0.317548629 | 8.149098314 | 0.008348928 |
| CCM2           | 0.145451454  | 7.682392979 | 0.008357118 |
| RRM2           | 0.275929045  | 7.857711493 | 0.008361864 |
| 4930455C21RIK  | -0.215074747 | 8.54356822  | 0.00836316  |
| LOC100047749   | 0.157573434  | 7.84848778  | 0.008364569 |
| BLNK           | 0.308667796  | 7.88457192  | 0.008365506 |
| E330016A19RIK  | -0.1696985   | 8.004292028 | 0.008394154 |
| 2200001I15RIK  | 0.295436329  | 7.71260601  | 0.008456962 |
| 3632431M01RIK  | -0.664984929 | 8.509072422 | 0.008474366 |
| NUAK2          | -1.091530405 | 11.04184352 | 0.008475294 |
| ATL2           | -0.320303032 | 8.276187855 | 0.008490968 |
| IYD            | -1.29612205  | 8.89304519  | 0.00849728  |
| SCL0003799.1_2 | 0.229674203  | 7.845122623 | 0.008497978 |
| AW544981       | 0.38908078   | 9.243706764 | 0.008516847 |
| 1110014O20RIK  | -0.704445309 | 10.30576351 | 0.008527574 |
| FBXO4          | -0.362491397 | 9.163379398 | 0.008527574 |
| MTERFD3        | -0.092307364 | 7.645433404 | 0.008527574 |
| SLC36A1        | -1.042489656 | 8.723423992 | 0.008527574 |
| S100A8         | 0.927209112  | 7.774849599 | 0.008534208 |
| IDH3G          | -0.418080938 | 11.07682837 | 0.008543922 |
| COX19          | -0.425480865 | 9.80539121  | 0.008545012 |
| CSTF3          | 0.177291468  | 8.455749082 | 0.008552757 |
| THEM2          | -0.618759544 | 11.23671239 | 0.008552757 |
| BARX2          | -0.986887752 | 8.438608791 | 0.008556233 |
| COG4           | -0.208316741 | 7.94916945  | 0.008568819 |
| LYRM5          | -0.278834253 | 8.885551418 | 0.008596061 |
| USE1           | -0.573782032 | 9.827445007 | 0.008609609 |
| AGPAT3         | -0.143652437 | 7.74971147  | 0.00861642  |
| GAPDH          | 0.540457211  | 12.86978808 | 0.008616849 |
| MFSD2          | 0.921022563  | 10.61292396 | 0.008632724 |
| UBE2Q1         | -0.324334039 | 8.768211301 | 0.008632727 |
| ASB8           | 0.229541114  | 10.47154387 | 0.008676245 |
| D10JHU81E      | -0.366552865 | 8.914000819 | 0.008686571 |

|               |              |             |             |
|---------------|--------------|-------------|-------------|
| SLC25A36      | -0.175381295 | 7.805807227 | 0.008687431 |
| TAF3          | -0.083208636 | 7.749946815 | 0.008703308 |
| PDSS1         | -0.640358588 | 8.690639115 | 0.008715009 |
| D10ERTD516E   | -0.171967515 | 7.888005141 | 0.008715844 |
| MSCP          | -0.706126904 | 9.11925762  | 0.008735262 |
| 9030611K07RIK | 0.17065985   | 7.614005893 | 0.008744895 |
| TMEM2         | 0.3330571    | 8.481479096 | 0.008749423 |
| C630024B01RIK | 0.341102116  | 7.759830256 | 0.008805138 |
| C230081A13RIK | -0.190633717 | 7.837246804 | 0.008813549 |
| UBB           | -0.467983183 | 15.24150492 | 0.008831344 |
| JUN           | -0.586337003 | 8.886510984 | 0.008834338 |
| CHRD          | 0.130647302  | 7.723534444 | 0.008840794 |
| RELA          | 0.638272848  | 10.72838809 | 0.00884617  |
| P4HB          | -0.679303759 | 14.39561749 | 0.008872928 |
| SPRR2H        | 0.269136965  | 7.579233079 | 0.008892888 |
| EG433923      | -0.978473547 | 11.15571036 | 0.008905683 |
| LOC384836     | 0.14015135   | 7.637669018 | 0.008916007 |
| CAR11         | 0.27977786   | 7.729019652 | 0.008955776 |
| LGALS6        | 1.349708933  | 11.4846886  | 0.008955776 |
| XPNPEP3       | 0.137485821  | 8.060806187 | 0.008955776 |
| LOC382163     | 0.096813258  | 7.616200928 | 0.008958248 |
| RDH16         | -0.353710916 | 7.805305047 | 0.008986701 |
| STIM1         | 0.17071809   | 7.847623513 | 0.008986701 |
| TLR13         | 0.1164954    | 7.643151093 | 0.008990877 |
| ITPK1         | -0.521208892 | 11.52797451 | 0.009022921 |
| PLA2G4B       | 0.100715762  | 7.581835902 | 0.009078692 |
| 2310007F21RIK | -0.272358312 | 8.365228731 | 0.009113134 |
| LOC269251     | 0.854348873  | 9.289288104 | 0.009131452 |
| 1810046J19RIK | -0.439451292 | 11.81123661 | 0.009146384 |
| GZF1          | -0.257766186 | 8.397541085 | 0.009146384 |
| PLCH2         | -0.270187031 | 7.783775699 | 0.009160354 |
| PPM1A         | -0.42257915  | 10.620303   | 0.009194976 |
| SLC9A8        | -0.149289308 | 8.009333779 | 0.009194976 |
| 7530408C15RIK | 0.129131074  | 7.607592045 | 0.00924133  |
| D2ERTD391E    | -0.294890961 | 8.676089138 | 0.009253696 |
| PPIL2         | -0.207970137 | 8.162702784 | 0.009255636 |
| DUSP6         | 1.060323258  | 11.20090971 | 0.009312573 |
| A330023F24RIK | 0.240982697  | 7.643291832 | 0.009359498 |
| MBTPS1        | -0.134135129 | 7.835629148 | 0.009419728 |
| HN1           | -0.555941705 | 11.81755649 | 0.009458012 |
| DUSP16        | -0.366947686 | 8.859209648 | 0.009465534 |
| EEF1D         | 0.218338098  | 9.883354932 | 0.009499425 |
| ADCK1         | -0.085534217 | 7.856539544 | 0.009505171 |
| SERINC2       | 0.859263573  | 9.953508627 | 0.009517386 |
| CARD14        | 0.298132691  | 7.810503778 | 0.009544241 |
| COPE          | -0.292395249 | 10.75792551 | 0.009624629 |
| TEX261        | -0.275662556 | 10.16434847 | 0.009624629 |
| WNK2          | -0.119603828 | 7.6368226   | 0.009640566 |
| ABHD1         | -0.853204433 | 9.266247122 | 0.009643326 |
| PDX1          | 0.392298936  | 7.685489405 | 0.009727974 |
| ENTPD8        | -0.219545895 | 7.851307664 | 0.009733056 |
| HAVCR2        | 0.111950761  | 7.594742795 | 0.009799977 |
| ETNK1         | 0.150534173  | 7.765413847 | 0.009807621 |
| 4631409F12RIK | -0.090126925 | 7.776512131 | 0.009828179 |
| TRIM72        | -0.369560716 | 7.776578524 | 0.009840254 |
| LOC666676     | -0.27174449  | 13.19985133 | 0.009875591 |
| TNFRSF10B     | 0.119580259  | 7.718849763 | 0.009875591 |
| SPRR2A        | 1.36135145   | 9.514079    | 0.009880842 |



|               |              |             |             |
|---------------|--------------|-------------|-------------|
| PCBP3         | 0.096519953  | 7.639421986 | 0.009897271 |
| DNAJC19       | -0.568114184 | 9.371436634 | 0.009915495 |
| PIP4K2A       | 0.635371983  | 8.962562799 | 0.009915495 |
| ZFP281        | 0.15273599   | 8.199013976 | 0.009915495 |
| DAAM1         | 0.404263216  | 8.482389632 | 0.009928779 |
| DDX58         | -0.387898112 | 8.144186429 | 0.009934521 |
| SYNGR1        | 0.115913842  | 7.62494621  | 0.009934521 |
| SERPINH1      | 0.770661729  | 9.123611359 | 0.009986261 |
| SNTA1         | -0.366856428 | 8.152447322 | 0.009989512 |
| ARSG          | -0.285427715 | 7.788972508 | 0.009996498 |
| ARHGAP9       | 0.136090305  | 7.735486357 | 0.0099992   |
| XDH           | -0.840478711 | 9.140905541 | 0.010033443 |
| SPINT1        | -0.434767676 | 12.79811965 | 0.010035864 |
| D130004H04RIK | 0.33283482   | 8.290055803 | 0.010045736 |
| CYBRD1        | 0.280812366  | 7.628689702 | 0.010069806 |
| ELL3          | -0.174188043 | 7.80124627  | 0.010078635 |
| A930026I22RIK | -0.111575528 | 7.649005036 | 0.010091579 |
| MYD88         | 0.429036538  | 9.907788776 | 0.010091579 |
| REG3A         | -1.61677023  | 11.52230147 | 0.010091579 |
| TM4SF4        | 1.751432454  | 10.74863554 | 0.010091579 |
| ZFP90         | 0.305349853  | 8.219034908 | 0.010091579 |
| LOC386078     | 0.360361205  | 9.120010649 | 0.010096003 |
| COL7A1        | 0.283244175  | 7.681943329 | 0.010099872 |
| FCGR2B        | 0.133159096  | 7.610977907 | 0.010101288 |
| TOR1A         | -0.283843972 | 8.227072736 | 0.01010207  |
| USP12         | -0.08755755  | 7.745067961 | 0.01010207  |
| CHRM3         | 0.145819238  | 7.749701058 | 0.010111216 |
| MTA3          | -0.334597661 | 8.314416859 | 0.010121439 |
| RB1           | -0.659558652 | 9.287189075 | 0.010139146 |
| PILRB1        | 0.118375468  | 7.561908647 | 0.010143309 |
| AMBP          | 1.20836685   | 8.369780609 | 0.010143514 |
| 2210417D09RIK | -1.092838717 | 10.29744001 | 0.010169155 |
| SOCS3         | 1.754760987  | 11.30586266 | 0.010178745 |
| C6            | 0.400548193  | 7.834412496 | 0.010254213 |
| FBXO10        | 0.244432996  | 7.850273404 | 0.010276987 |
| STOML2        | -0.147071136 | 7.723221278 | 0.010294713 |
| ZFP592        | -0.211501708 | 8.239276306 | 0.010312461 |
| CDC40         | -0.092183844 | 7.84706143  | 0.010314503 |
| VWA5A         | -0.438515119 | 8.996292999 | 0.010324257 |
| PSMC3         | 0.332749661  | 10.4216561  | 0.010326366 |
| PDE1B         | 0.284302514  | 8.129747366 | 0.01033134  |
| LOC100044776  | -0.324973032 | 9.013794076 | 0.01033613  |
| BC051227      | 0.337876192  | 8.373276894 | 0.010362866 |
| GALNT2        | 0.394056888  | 9.370151673 | 0.010363459 |
| SLC35A5       | -0.088302288 | 7.64823565  | 0.010368999 |
| HIF1AN        | -0.303338818 | 8.588288398 | 0.010404219 |
| CPT1B         | -0.254090956 | 7.89455862  | 0.01040772  |
| SRI           | 0.391152267  | 9.978947166 | 0.010435417 |
| EIF2AK2       | -0.983184007 | 11.07942421 | 0.010446655 |
| RAB11B        | -0.256382382 | 10.89298243 | 0.010450059 |
| ATAD1         | -0.249846207 | 9.290982121 | 0.010459654 |
| FLNB          | 0.986437208  | 8.781291283 | 0.010459654 |
| RAB2A         | -0.107691558 | 11.20304719 | 0.010459654 |
| C030033M12RIK | -0.141366236 | 7.861452701 | 0.0104669   |
| 2310051E17RIK | 0.206162213  | 7.932367862 | 0.010484813 |
| TSPAN2        | 0.141271089  | 7.647907602 | 0.010506279 |
| ES22          | -0.521400544 | 7.850809652 | 0.010526673 |
| RBM45         | -0.354533014 | 9.18876253  | 0.010550466 |

|                |              |             |             |
|----------------|--------------|-------------|-------------|
| CAP1           | 0.811009707  | 11.33949161 | 0.010558634 |
| SETD4          | 0.092587479  | 7.725437449 | 0.010561397 |
| ANAPC2         | -0.209134921 | 8.072199395 | 0.010562603 |
| SGCB           | 0.151685268  | 7.773999257 | 0.010571866 |
| CDKL5          | 0.128903126  | 7.684512491 | 0.010590052 |
| TRIM27         | 0.199510879  | 8.024710409 | 0.010591799 |
| SLC25A38       | -0.257981232 | 9.367756583 | 0.010635397 |
| SAPS3          | -0.359898362 | 9.129280079 | 0.010641111 |
| APLP1          | -0.459113147 | 8.076671275 | 0.010652368 |
| AGFG2          | 0.153129108  | 7.918002805 | 0.010655428 |
| GAN            | 0.141465044  | 7.744966302 | 0.010655428 |
| LOC230253      | 0.713806752  | 11.7662251  | 0.010655428 |
| 4933401P20RIK  | 0.101721618  | 7.606345602 | 0.010657727 |
| MIER1          | -0.09982396  | 8.082649736 | 0.010665439 |
| 9630027A13RIK  | -0.196284906 | 8.194020039 | 0.010676851 |
| SFRP1          | 0.279181576  | 7.970036089 | 0.010676851 |
| ELF1           | -0.418416512 | 9.703520317 | 0.010740238 |
| ALOXE3         | 0.484605746  | 7.681654958 | 0.010750982 |
| PEX10          | -0.094473645 | 7.731988152 | 0.010750982 |
| TARDBP         | -0.113966799 | 7.807481399 | 0.010750982 |
| 2310011G17RIK  | 0.134550477  | 8.513652472 | 0.010759887 |
| PCBP2          | -0.365065812 | 10.52691088 | 0.010763685 |
| KCNK13         | 0.13781732   | 7.662182654 | 0.010792838 |
| LOC634731      | 0.11649182   | 7.573615114 | 0.010792838 |
| FAM118A        | -0.090659285 | 7.602838346 | 0.010839043 |
| KCTD1          | 0.106172939  | 7.596926455 | 0.010839043 |
| LOC383766      | -0.111730456 | 7.655805645 | 0.010863219 |
| MAF            | -0.131280241 | 7.757240895 | 0.010863219 |
| AI607873       | 0.529280693  | 7.862351774 | 0.010917817 |
| MRPS9          | -0.327653436 | 9.567319168 | 0.01092402  |
| PFN2           | 0.172548925  | 7.851027215 | 0.01093436  |
| E130307D12     | -0.124277435 | 7.830771635 | 0.01094999  |
| GPX2           | 2.075790033  | 14.37414813 | 0.010965603 |
| CCL17          | 0.369126484  | 7.887073398 | 0.010988739 |
| AKP5           | -0.107341215 | 7.690181059 | 0.010991513 |
| YDJC           | -0.241543895 | 8.120997103 | 0.0110448   |
| MAP3K11        | -0.304832874 | 10.05890572 | 0.011052525 |
| BC003314       | 0.118524786  | 7.57954141  | 0.011060308 |
| N4WBP5-PENDING | -0.293804798 | 10.32527726 | 0.011090486 |
| GALNT6         | -0.159801368 | 7.791486123 | 0.011101806 |
| A130026C10RIK  | 0.474665799  | 8.02466718  | 0.011113829 |
| A430107N12RIK  | -0.229415891 | 8.947044132 | 0.011113829 |
| PPP3CB         | -0.223350587 | 9.694740851 | 0.011113829 |
| A730004F22RIK  | -0.209334293 | 8.022065368 | 0.011121294 |
| GIPC1          | 0.261039667  | 7.958500408 | 0.011204651 |
| 2310003F16RIK  | 0.339331146  | 11.21736174 | 0.011205273 |
| TRPT1          | -0.149465375 | 7.817056527 | 0.011232782 |
| RAC1           | 0.252938962  | 8.921490165 | 0.011257514 |
| PTP4A2         | 0.313392735  | 11.2688902  | 0.011281879 |
| LOC100047490   | 0.503983977  | 11.9829777  | 0.011290499 |
| POLR2L         | 0.467637307  | 11.58062566 | 0.011290499 |
| CNNM4          | -0.129052509 | 7.655128801 | 0.011298881 |
| EPN3           | 0.132019915  | 7.582085275 | 0.011307536 |
| NFATC4         | 0.285563065  | 7.816319828 | 0.011307536 |
| ITLNB          | 1.4614237    | 12.57390517 | 0.011338334 |
| HOXD8          | 0.096902901  | 7.655768939 | 0.011342206 |
| 1110058L19RIK  | -0.300113013 | 9.305978316 | 0.011347705 |
| IFRD1          | 0.173401511  | 7.764405283 | 0.011374007 |

|               |              |             |             |
|---------------|--------------|-------------|-------------|
| TMEM50B       | -0.28103187  | 7.967099413 | 0.011374007 |
| D15ERTD682E   | 0.131727233  | 7.831860666 | 0.011377973 |
| AI850995      | -0.603699883 | 8.766069521 | 0.01138737  |
| CNOT2         | -0.130525632 | 8.600187687 | 0.011403427 |
| PNPLA7        | 0.313116078  | 8.006819499 | 0.011418197 |
| 2810451K12RIK | -0.119849352 | 7.613055427 | 0.011445131 |
| 4930573I19RIK | 0.1155672    | 7.793573078 | 0.011445131 |
| INTS10        | -0.279600114 | 8.317539062 | 0.011445131 |
| LOC100046278  | 1.451976623  | 14.48468476 | 0.011445131 |
| SPSB1         | 1.039715293  | 10.23815911 | 0.011481875 |
| MTDH          | 0.55796537   | 10.29294934 | 0.011516145 |
| DEFMR6        | 0.392808406  | 14.31316358 | 0.011528122 |
| GMFG          | 0.36879894   | 8.316573453 | 0.011528122 |
| JMJD2B        | -0.170262197 | 8.339289666 | 0.011557918 |
| ADAP2         | -0.134430511 | 8.183649523 | 0.01158372  |
| MORF4L2       | 0.322200845  | 12.34438341 | 0.01158372  |
| 5730543M03RIK | -0.596886745 | 8.822478601 | 0.01162732  |
| HDAC11        | -0.427132905 | 7.847831024 | 0.01162732  |
| C730009D12    | 1.844479097  | 8.880577881 | 0.011639094 |
| GIMAP6        | 0.309117428  | 8.078357734 | 0.011676684 |
| FAM151A       | -1.948446137 | 8.69511767  | 0.011677034 |
| 1110034O24RIK | 0.4078509    | 9.457305262 | 0.011677065 |
| A130019A16RIK | 0.101212613  | 7.613727545 | 0.011677065 |
| LOC629364     | 0.556562959  | 9.510306269 | 0.011677065 |
| MEST          | 0.165487639  | 7.565512625 | 0.011677065 |
| PLA2G2F       | 0.146567951  | 7.670106333 | 0.011677065 |
| CYP2J9        | -0.387719085 | 7.841108629 | 0.011681067 |
| LOC636952     | -0.423685764 | 9.223674931 | 0.011681067 |
| UBE2D2        | -0.2440055   | 10.05732793 | 0.011706453 |
| B230207L18RIK | -0.125048058 | 7.633253154 | 0.011732873 |
| PDE6D         | -0.262944909 | 8.199279871 | 0.011732873 |
| E530004K11RIK | -0.249578539 | 7.72985767  | 0.011743322 |
| GPR114        | 0.682030307  | 8.605564648 | 0.011747609 |
| DDX27         | 0.206185933  | 8.632110536 | 0.011751822 |
| PNLIPRP2      | 1.286149209  | 9.385004965 | 0.011753223 |
| LOC100044376  | -0.497028146 | 11.06781515 | 0.011782605 |
| 6430590A07RIK | -0.205286792 | 7.954119883 | 0.011784056 |
| RNF44         | 0.322357146  | 10.57940151 | 0.011785829 |
| CGGBP1        | -0.372872554 | 10.34480932 | 0.011786668 |
| LOC383125     | 0.539860931  | 8.250598316 | 0.011800771 |
| MYAK          | 0.333905979  | 8.087812073 | 0.011800771 |
| PHACTR4       | -0.459203753 | 11.07835271 | 0.011800771 |
| VTI1B         | -0.307362941 | 10.00361282 | 0.011800771 |
| GTF2IRD2      | -0.113184204 | 7.826118113 | 0.011817683 |
| ROCK1         | 0.169844352  | 7.876489734 | 0.011817683 |
| 3110001A13RIK | 0.15139667   | 7.811287669 | 0.011821471 |
| LGALS3        | 0.759745984  | 13.6757613  | 0.011821471 |
| CITED2        | -0.382043319 | 8.872217442 | 0.011837218 |
| RABGGTA       | 0.222350961  | 8.316338798 | 0.011842181 |
| LOC675377     | 0.22243171   | 13.01664408 | 0.011853378 |
| BC025446      | -0.590558929 | 10.66299657 | 0.011856822 |
| LINCR         | -0.267249963 | 8.225344457 | 0.01186365  |
| RBM8A         | -0.211133665 | 7.985174689 | 0.01186365  |
| ZFP472        | -0.120259788 | 8.038968941 | 0.01186365  |
| CBR1          | -0.629933652 | 10.34714578 | 0.01188274  |
| CORO1A        | 0.6978336    | 8.513147167 | 0.011921541 |
| DDAH1         | 1.251345111  | 10.43259008 | 0.011929972 |
| 2610019E17RIK | 0.343855612  | 9.605113315 | 0.01196776  |

|               |              |             |             |
|---------------|--------------|-------------|-------------|
| NAPSA         | 0.271396549  | 7.816243497 | 0.011972984 |
| DCLRE1B       | 0.084919454  | 7.770975085 | 0.011998034 |
| GPC1          | 0.479076937  | 8.387397052 | 0.012000321 |
| LOC100046841  | -0.120468155 | 7.7801126   | 0.012018888 |
| TOMM7         | -0.414764615 | 10.56590224 | 0.012053221 |
| AMPD1         | 0.081449573  | 7.585646401 | 0.012072096 |
| A130096D14RIK | -0.320896574 | 8.050242533 | 0.01208425  |
| BC002163      | -0.593572133 | 10.85356327 | 0.012087992 |
| RFC4          | -0.221553867 | 7.924838237 | 0.012116246 |
| TMEM9         | 0.185215094  | 7.932746698 | 0.012116246 |
| UBA2          | 0.266456429  | 8.914848942 | 0.012116246 |
| SHMT1         | -0.358003253 | 8.045355947 | 0.012120581 |
| DHRS1         | -0.734318281 | 11.99055023 | 0.01212805  |
| CNP1          | 0.145944401  | 7.697058573 | 0.012194884 |
| DCAKD         | -0.182091845 | 9.884236543 | 0.012205997 |
| PODXL         | 0.248486138  | 8.022257939 | 0.012223235 |
| PMM1          | 0.364365915  | 7.936029453 | 0.012228071 |
| CD72          | 0.411906731  | 7.920949689 | 0.012236567 |
| MBP           | 0.195555871  | 8.004799596 | 0.012267301 |
| A430088H15RIK | 0.184943783  | 7.902883963 | 0.012274512 |
| PPFIBP2       | -0.136427521 | 8.05828085  | 0.012297936 |
| CST3          | 0.555954566  | 10.9982335  | 0.012344487 |
| FRAT1         | -0.121138113 | 7.725140679 | 0.012353916 |
| LOC100048530  | -0.13917447  | 7.756141147 | 0.012353916 |
| NMRAL1        | -0.261174777 | 8.051637754 | 0.012353916 |
| PYGO2         | 0.358507102  | 9.759823633 | 0.012353916 |
| REEP4         | 0.214640933  | 8.229616091 | 0.012353916 |
| DEFSCR20      | 1.361585698  | 14.26911826 | 0.01235956  |
| MED4          | 0.132849683  | 8.20713928  | 0.012395803 |
| ARFL4         | -0.178767742 | 7.817089293 | 0.012419256 |
| SLAMF8        | 0.278860008  | 7.880055336 | 0.012422574 |
| LOC100044298  | -0.446690455 | 9.362555383 | 0.012426299 |
| ZXDC          | -0.114459347 | 7.839169805 | 0.012444446 |
| 9030624J02RIK | -0.126818916 | 8.269349334 | 0.012480218 |
| F13A1         | 0.280447968  | 7.716072222 | 0.012480218 |
| MCEE          | -0.510803911 | 9.618384499 | 0.012490983 |
| CEACAM20      | -1.043400005 | 9.002079191 | 0.012511152 |
| GSDMDC1       | -0.740026486 | 11.51945008 | 0.012511152 |
| ZFP36L1       | 0.278365537  | 10.47845824 | 0.012511152 |
| CAMK1D        | -0.09876625  | 7.663990753 | 0.012516935 |
| IFI35         | -0.672613568 | 8.776507242 | 0.012519812 |
| VAMP2         | 0.358272157  | 8.969905928 | 0.012521734 |
| 5830406C17RIK | -0.205408396 | 8.033064377 | 0.012528618 |
| CDKN2C        | -0.115142832 | 7.780237975 | 0.012568201 |
| CHST11        | 0.12871584   | 7.614779218 | 0.01257854  |
| SLC6A19       | -0.919824753 | 10.39637787 | 0.01257854  |
| PSMB10        | -1.065900198 | 11.65899093 | 0.012588819 |
| MYH14         | -0.193202975 | 8.027556908 | 0.012660009 |
| RRP12         | 0.387907186  | 9.634942662 | 0.012667132 |
| NRN1          | -0.290070875 | 7.869778666 | 0.012685285 |
| GLRX2         | -0.162924509 | 8.163919475 | 0.012744568 |
| CEACAM2       | 0.859551484  | 11.2009362  | 0.012755248 |
| AQP5          | 0.227710794  | 7.675288626 | 0.01276337  |
| DOK3          | 0.578796236  | 8.281631383 | 0.01276337  |
| STT3B         | -0.58530206  | 11.99409833 | 0.01276337  |
| LOC671523     | -0.13737526  | 7.931451508 | 0.012764319 |
| ST3GAL5       | 0.103117677  | 7.621027747 | 0.012764668 |
| SAPS1         | -0.140487621 | 8.533544861 | 0.012765039 |

|               |              |             |             |
|---------------|--------------|-------------|-------------|
| TMEM162       | -0.220216882 | 8.079097591 | 0.012765957 |
| CEBPB         | 0.800799263  | 11.0857662  | 0.012789129 |
| NDUFA1        | -0.349095641 | 12.44578805 | 0.012789129 |
| PSME3         | 0.328457952  | 10.52500599 | 0.012809413 |
| 2010005J08RIK | -0.207914219 | 8.629225117 | 0.01284536  |
| LRIG1         | 0.22987815   | 8.613829557 | 0.012862303 |
| EG277333      | 0.237593005  | 8.396811923 | 0.012886956 |
| RDH14         | -0.382167243 | 8.538659281 | 0.012886956 |
| YIF1A         | -0.322818845 | 9.232439657 | 0.012894956 |
| WHSC1         | -0.096278261 | 7.894315019 | 0.012929625 |
| FKBP11        | 0.829193868  | 8.724313003 | 0.012968972 |
| CCL3          | 0.125461454  | 7.585803563 | 0.012975165 |
| HADHSC        | -0.104573948 | 7.697660589 | 0.012975165 |
| MADCAM1       | 0.222009904  | 7.699231765 | 0.012975165 |
| BC066028      | 0.084092048  | 7.632815022 | 0.012999819 |
| SC4MOL        | 0.844474993  | 10.8168114  | 0.012999819 |
| PSAPL1        | 0.189151513  | 7.575701781 | 0.013023627 |
| TNFSF10       | -0.242363007 | 7.677725808 | 0.013023627 |
| RFNG          | -0.092294346 | 7.651465872 | 0.013025834 |
| VPS36         | 0.361754711  | 9.938924529 | 0.013025834 |
| SNX30         | 0.180502751  | 7.839178532 | 0.013032109 |
| CAPNS1        | 0.733593435  | 9.814089841 | 0.013053874 |
| DCI           | -0.596349841 | 8.930597556 | 0.013053874 |
| LY86          | 0.524803218  | 7.977799115 | 0.013053874 |
| 1700081H05RIK | 0.083494865  | 7.59364393  | 0.013062475 |
| NSMCE1        | 0.376812149  | 10.62217443 | 0.013062475 |
| 1810008K04RIK | -0.125628865 | 7.697252737 | 0.013099548 |
| BC049806      | -0.641925546 | 8.59311342  | 0.013113397 |
| HEMK1         | -0.231898626 | 8.07479614  | 0.013113792 |
| VWCE          | -0.125296028 | 7.610681122 | 0.013118863 |
| NCAPD2        | -0.20578457  | 7.944819492 | 0.013132994 |
| A2LD1         | -0.483222944 | 8.681805958 | 0.013145715 |
| 4933427G23RIK | 0.276392302  | 8.760517559 | 0.013164621 |
| MGAT4B        | 0.335181675  | 8.678001705 | 0.013164621 |
| FBXO18        | -0.194803345 | 8.250919999 | 0.013254792 |
| SCAMP4        | 0.462061615  | 10.05783839 | 0.013256091 |
| LOC213948     | 0.092917402  | 7.577799477 | 0.013256703 |
| LMBR1L        | -0.227786236 | 8.158183423 | 0.013286238 |
| EG625054      | 0.176666463  | 13.21485898 | 0.013340915 |
| 1110034G24RIK | -0.106444615 | 7.69590643  | 0.013349113 |
| LOC666904     | -0.298390567 | 14.83419724 | 0.013352336 |
| RXR8          | -0.224095935 | 8.184889007 | 0.013359936 |
| STT3A         | -0.230120231 | 7.900858241 | 0.013359936 |
| SLC25A10      | -0.391187462 | 9.903149985 | 0.013377437 |
| WIPI2         | -0.172820212 | 8.147111777 | 0.013393674 |
| CDC42SE1      | 0.245291211  | 9.066657221 | 0.013416813 |
| SIN3A         | -0.23291239  | 8.592627577 | 0.013438037 |
| AK2           | -0.627151748 | 9.729162213 | 0.013441046 |
| EXT2          | -0.176050005 | 8.230442829 | 0.013450753 |
| HOXA5         | 0.298236067  | 7.89954965  | 0.013450753 |
| ID1           | 0.609779347  | 10.23174774 | 0.013450753 |
| RFC1          | 0.159860798  | 8.317397977 | 0.013461135 |
| NOL10         | 0.14927547   | 8.18615753  | 0.013486822 |
| CTNS          | -0.364770936 | 8.610056355 | 0.013517652 |
| ORAI1         | 0.430972669  | 9.600067865 | 0.013522064 |
| SPATA13       | -0.416580044 | 9.48968472  | 0.013539248 |
| EPHB3         | 0.101595678  | 7.575084404 | 0.013540905 |
| 5930418K15RIK | 0.73596213   | 11.43404725 | 0.013558797 |

|               |              |             |             |
|---------------|--------------|-------------|-------------|
| NARG2         | -0.099273305 | 7.735765009 | 0.013558806 |
| ZFP87         | -0.129480298 | 7.922920665 | 0.013573831 |
| MACROD1       | -0.391799419 | 8.053333983 | 0.013575464 |
| PMEPA1        | 0.184145372  | 7.810714798 | 0.013577887 |
| MYO9A         | 0.075817226  | 7.607161023 | 0.013605    |
| HGFAC         | 0.678471105  | 9.021568798 | 0.013610923 |
| PIM1          | -0.083426626 | 7.713914264 | 0.013628884 |
| SLC2A6        | 0.196312432  | 7.838876586 | 0.013632357 |
| LOC100044159  | -0.175117292 | 8.067780267 | 0.013666325 |
| BLOC1S2       | 0.370764944  | 8.926552149 | 0.013666528 |
| PAPOLG        | -0.24927007  | 8.247912988 | 0.013666528 |
| F630047D10RIK | -0.127351675 | 7.651829529 | 0.013666953 |
| SOCS2         | 0.380705882  | 10.14182604 | 0.013667074 |
| 1810055E12RIK | 0.23831383   | 8.932765006 | 0.013728084 |
| MTERFD2       | -0.14660588  | 8.165819935 | 0.013728084 |
| SOSTDC1       | 0.142218392  | 7.647354832 | 0.013759359 |
| PARVA         | 0.314451945  | 8.767041642 | 0.013759871 |
| A630082K20RIK | 0.231832655  | 8.78808269  | 0.013769441 |
| BCL2L13       | -0.268228125 | 8.407203249 | 0.013769441 |
| A930009M04RIK | -0.392271451 | 9.26525792  | 0.013774952 |
| RNF113A2      | 0.401070423  | 9.103193339 | 0.013791535 |
| SPRR2D        | 0.659050361  | 7.733853283 | 0.013791535 |
| CUX1          | -0.109584742 | 7.772633173 | 0.013793797 |
| PPARA         | -0.109857003 | 7.65002405  | 0.013804391 |
| MRPS18B       | 0.484042265  | 9.008549056 | 0.013852354 |
| VPS37C        | -0.176306293 | 8.00559749  | 0.013864168 |
| A430084P05RIK | 0.173754542  | 7.613343442 | 0.013872187 |
| MYLK          | -0.869800573 | 10.84353529 | 0.013872187 |
| OLFR165       | -0.176482644 | 7.615989318 | 0.013884501 |
| SAMD4B        | 0.3055068    | 8.712525389 | 0.013884501 |
| TERF2IP       | -0.106521137 | 8.138687034 | 0.013884501 |
| SNPH          | -0.3964641   | 7.821931849 | 0.013885516 |
| GHITM         | -0.412974382 | 9.431825431 | 0.013930891 |
| 9530055J05RIK | 0.256695251  | 8.168208729 | 0.014006876 |
| 1500010J02RIK | 0.358842917  | 8.298897911 | 0.014042142 |
| A630097K09RIK | 0.110172466  | 7.580261778 | 0.014042142 |
| CLDND1        | -0.337567785 | 8.772783235 | 0.014058133 |
| PER2          | -0.773392627 | 8.307438968 | 0.014058868 |
| 4933422H20RIK | -0.466762645 | 7.936456804 | 0.014155012 |
| PPT1          | 0.519062276  | 8.279455092 | 0.014160984 |
| NME1          | 0.469845942  | 12.70263122 | 0.014191711 |
| ARL14         | 1.081608821  | 10.42664797 | 0.014237387 |
| COMMD7        | -0.157068464 | 8.9861973   | 0.01426006  |
| 2310004I03RIK | -0.477265273 | 8.811985433 | 0.014260732 |
| LXN           | 0.289600997  | 10.10305667 | 0.014271802 |
| MAP3K8        | 0.079804462  | 7.594261244 | 0.014271802 |
| C630004H02RIK | 0.183836961  | 8.030883662 | 0.014302254 |
| PHF10         | 0.306318759  | 9.502978153 | 0.014306037 |
| SLC25A42      | -0.285076825 | 7.823516494 | 0.014313617 |
| ZC3HC1        | 0.176334357  | 8.121445839 | 0.014314729 |
| BHLHB9        | 0.249828474  | 8.137438758 | 0.014397163 |
| TXLNA         | 0.154267195  | 8.172837051 | 0.014402972 |
| EDG7          | -0.293236423 | 7.83837066  | 0.014413796 |
| EG433182      | 0.184880711  | 7.827547346 | 0.014413796 |
| LNX1          | -0.223453191 | 7.893832097 | 0.014516012 |
| SCAMP5        | -0.46088914  | 9.531228426 | 0.014516012 |
| 8430419L09RIK | -0.120047436 | 7.627318141 | 0.01457605  |
| 2310047M10RIK | 0.410079581  | 9.294173065 | 0.014577515 |

|               |              |             |             |
|---------------|--------------|-------------|-------------|
| MT3           | 0.675094999  | 7.735879341 | 0.014588305 |
| KLHDC5        | 0.07288402   | 7.622153108 | 0.014607325 |
| WNT6          | -0.081441413 | 7.629123475 | 0.014627749 |
| RP9           | -0.414084315 | 9.866870842 | 0.014630359 |
| FAM149B       | -0.117182308 | 7.639051287 | 0.014641421 |
| 5430440L12RIK | -0.285581337 | 8.195502208 | 0.01466859  |
| SEPHS1        | -0.137643266 | 7.695124954 | 0.014673458 |
| GDE1          | -0.436348012 | 8.989992381 | 0.014673639 |
| HPCAL4        | 0.145507652  | 7.706991311 | 0.014673639 |
| 3110078M01RIK | -0.27565624  | 8.147751859 | 0.014675856 |
| CARS2         | -0.153583665 | 7.784216785 | 0.014676865 |
| EVI1          | 0.106313063  | 7.658237998 | 0.014676865 |
| BC034090      | 0.083867464  | 7.591996913 | 0.014695441 |
| 2310022A10RIK | 0.1656006    | 8.254945237 | 0.014713352 |
| GNL2          | 0.187052078  | 8.131035831 | 0.014720817 |
| LRRFIP2       | -0.166456051 | 7.985445818 | 0.014720817 |
| DYNLT3        | 0.340587631  | 8.901834434 | 0.014779814 |
| NRD1          | 0.287657827  | 10.83180063 | 0.014782537 |
| SEL1L         | -0.178777565 | 8.294700985 | 0.01478685  |
| YIPF3         | -0.243948581 | 9.799248979 | 0.01478685  |
| HSD17B12      | 0.332694713  | 9.242170833 | 0.01479686  |
| SSH3          | 0.111756215  | 8.033599683 | 0.014833454 |
| TUG1          | -0.108281194 | 7.93036704  | 0.01485041  |
| ATP1B2        | 0.123257026  | 7.649136288 | 0.01485134  |
| NDUFA9        | -0.435458542 | 10.74252335 | 0.014950636 |
| 1190017O12RIK | -0.285577864 | 9.444849341 | 0.014952468 |
| LOC674611     | 0.156485875  | 7.637842802 | 0.014967884 |
| DOT1L         | 0.17653598   | 7.944508121 | 0.014975314 |
| 5730410E15RIK | -0.093071194 | 7.708803045 | 0.014996438 |

## Supplemental Table 2

| <b>Gene ID</b> | <b>Accession</b> | <b>number of peptides</b> | <b>CLASS</b> |
|----------------|------------------|---------------------------|--------------|
| Tceb1          | IPI00323130      |                           | 3 Class A    |
| Tceb2          | IPI00131224      |                           | 4 Class A    |
| Nrbp1          | IPI00222739      |                           | 7 Class A    |
| Tsc22d2        | IPI00762599      |                           | 9 Class A    |
| Tsc22d4        | IPI00111328      |                           | 4 Class A    |
| Tsc22d4        | IPI00653463      |                           | 4 Class A    |
| Sall4          | IPI00828722      |                           | 11 Class A   |
| Sall4          | IPI00475164      |                           | 11 Class A   |



### Supplemental Table 3

| Sequence Name (Gene) | Gene Public Name |
|----------------------|------------------|
| AC8.2                |                  |
| AH10.5               |                  |
| AH6.1                | gcy-1            |
| B0001.4              | B0001.4          |
| B0024.5              |                  |
| B0024.6              | gcy-6            |
| B0025.1              |                  |
| B0198.3              | B0198.3          |
| B0205.7              | kin-3            |
| B0207.4              | B0207.4          |
| B0207.4              | air-2            |
| B0207.7              | B0207.7          |
| B0218.3              | pmk-1            |
| B0218.5              |                  |
| B0222.9              | B0222.9          |
| B0240.3              | daf-11           |
| B0252.1              | B0252.1          |
| B0261.2              |                  |
| B0285.1              |                  |
| B0285.1              | B0285.1          |
| B0285.10             | ckb-3            |
| B0285.2              |                  |
| B0285.8              | ckb-1            |
| B0285.9              | ckb-2            |
| B0302.1A             | kin-25           |
| B0302.5              | B0302.5          |
| B0334.8              | age-1            |
| B0414.7              |                  |
| B0464.5              | spk-1            |
| B0478.1              |                  |
| B0495.2              | B0495.2          |
| B0496.3              |                  |
| B0511.4              | tag-344          |
| B0523.1              | kin-31           |
| B0545.1              |                  |
| C01B7.4              | tag-117          |
| C01C4.3              | C01C4.3          |
| C01C7.1              | ark-1            |
| C01G6.8              |                  |
| C01G6.8A             | cam-1            |
| C01H6.9              | C01H6.9          |
| C03B1.5              |                  |
| C03C10.1             | kin-19           |
| C03C10.2             | C03C10.2         |
| C04A11.3             | tag-334          |
| C04G2.10             |                  |
| C04G2.2              |                  |
| C04G6.1              | mpk-2            |
| C04G6.4              | C04G6.4          |
| C04H5.3              | C04H5.3          |
| C04H5.4              |                  |
| C04H5.5              |                  |
| C05B10.1             | lip-1            |
| C05C12.1             | C05C12.1         |

|                |              |
|----------------|--------------|
| C05D10.2       | C05D10.2     |
| C05D10.2       |              |
| C05D2.1        |              |
| C05H8.1        | ckk-1        |
| C05H8.1        | ckk-1        |
| C06A12.4       | gcy-27       |
| C06B3.6        | C06B3.6      |
| C06E2.2        | C06E2.2      |
| C06E4.5        | C06E4.5      |
| C06E8.3A       | prk-1        |
| C07A9.12       |              |
| C07A9.3        | tlk-1        |
| C07G1.3        |              |
| C08F8.6        | C08F8.6      |
| C08H9.5        |              |
| C08H9.8        | C08H9.8      |
| C09B8.7        | pak-1        |
| C09B9.4        |              |
| C09D1.1        | unc-89       |
| C09D4.3        | C09D4.4      |
| C09E10.2B      | dgk-1        |
| C09F9.4        | C09F9.4      |
| C09G4.2        |              |
| C09G4.3        | dom-6        |
| C09H10.5       | C09H10.5     |
| C10C6.1        | kin-4        |
| C10G11.5A      | pnk-1        |
| C10H11.9       | let-502      |
| C12D8.10       | akt-1        |
| C12D8.10B      | akt-1        |
| C14A4.13       |              |
| C14B9.4B       | plk-1        |
| C14B9.8        | C14B9.8      |
| C15H7.5        | C17D12.7     |
| C16A11.3       | C16A11.3     |
| C16B8.1        | lin-18       |
| <u>C16D9.2</u> | <u>rol-3</u> |
| C17C3.11       | C17C3.11     |
| C17D12.7       |              |
| C17E7.9        |              |
| C17F4.6        | gcy-19       |
| C17F4.6        | gcy-19       |
| C18H7.4        |              |
| C24A1.3        | C24A1.3      |
| C24A1.3        |              |
| C24A8.4        |              |
| C24G6.2        |              |
| C24G7.5        | C24G7.5      |
| C25A1.14       |              |
| C25A8.5        |              |
| C25F6.2        | dlg-1        |
| C25F6.4        |              |
| C25H3.1        |              |
| C26C6.8        | C26C6.8      |
| C26D10.4       |              |
| C26E6.1        | C26E6.1      |
| C27D8.1        | C27D8.1      |
| C28A5.6        | C28A5.6      |

|          |          |
|----------|----------|
| C28D4.2  | cka-1    |
| C29E4.8  | C29E4.8  |
| C29F5.2  | sdz-3    |
| C29F7.3  | C29F7.3  |
| C29F9.7  | pat-4    |
| C29H12.5 | C29H12.5 |
| C30G4.3  | gcy-11   |
| C31E10.8 | C31E10.8 |
| C32D5.2  | sma-6    |
| C33F10.2 | C33F10.2 |
| C34B2.3  | C34B2.3  |
| C34C6.5  | tag-274  |
| C34C6.5  |          |
| C34F11.5 | C34F11.5 |
| C34G6.5  | C34G6.5  |
| C35B8.2  | vav-1    |
| C36B1.10 | C36B1.10 |
| C36B1.11 | C36B1.11 |
| C36B7.1  | C36B7.1  |
| C36B7.2  | C36B7.2  |
| C38C3.4  | C38C3.4  |
| C38C6.6  | tag-297  |
| C39B10.3 |          |
| C39H7.1  |          |
| C41C4.4  | ire-1    |
| C41C4.4  | ire-1    |
| C42C1.3  | C42C1.3  |
| C42C1.9  | C42C1.9  |
| C44C10.7 |          |
| C44C8.6  |          |
| C44H4.5  | tap-1    |
| C44H4.6  | C44H4.6  |
| C45B11.1 | tag-66   |
| C45G9.1  | C45G9.1  |
| C46C2.1  | wnk-1    |
| C46H11.4 |          |
| C46H3.2  |          |
| C47D12.1 |          |
| C48B6.6  |          |
| C49C3.10 | C49C3.10 |
| C49C3.2  |          |
| C49C8.1  |          |
| C49H3.1  | gcy-8    |
| C49H3.2  | C49H3.2  |
| C50D2.7  | C50D2.7  |
| C50F2.8  | C50F2.9  |
| C50F4.11 |          |
| C50F4.2  | C50F4.2  |
| C50H2.7  | C50H2.7  |
| C52A11.4 | mpz-1    |
| C52B9.1A | cka-2    |
| C53A5.4  | C53A5.4  |
| C53B4.4  |          |
| C53B7.6  | C53B7.6  |
| C54G4.1  | C54G4.1  |
| C55B6.1  |          |
| C55B6.5  | C55B6.5  |
| C55B7.10 | C55B7.10 |

|          |          |
|----------|----------|
| C55C3.4  |          |
| C56A3.8  | C56A3.8  |
| C56C10.6 |          |
| C56G2.5  | C56G2.5  |
| D1044.1  | D1044.1  |
| D1044.8  |          |
| D1073.1  | D1073.1  |
| D2013.4  |          |
| D2024.1  | D2024.1  |
| D2045.5  |          |
| D2045.7  |          |
| D2096.12 |          |
| D2096.3  | D2096.3  |
| DC2.7    |          |
| E01H11.1 | pkc-2    |
| E02C12.8 |          |
| E02D9.1  | E02D9.1  |
| E02H1.6  | E02H1.6  |
| E02H4.3  |          |
| E02H4.6  |          |
| EEED8.9  | pink-1   |
| F01D4.3  |          |
| F01F1.11 | F01F1.11 |
| F02D8.1  | F02D8.1  |
| F07A11.5 | F07A11.5 |
| F07H5.7  | F07H5.7  |
| F08B1.1  |          |
| F08B1.2  | gcy-12   |
| F08B4.3  | F08B4.3  |
| F08F1.1B | kin-9    |
| F09A5.2  |          |
| F09C12.2 |          |
| F09C12.3 |          |
| F09E5.1  | pkc-3    |
| F09G2.1  |          |
| F09G8.7  | F09G8.7  |
| F10C2.1  |          |
| F10C2.2  | kup-1    |
| F10G7.6  | F10G7.6  |
| F10G8.2  | F10G8.2  |
| F11A5.13 | F11A5.13 |
| F11D5.3  |          |
| F11E6.8  | F11E6.8  |
| F11F1.5  | F11F1.5  |
| F11G11.5 | F11G11.5 |
| F12A10.2 | F12A10.2 |
| F12F3.2  | F12F3.2  |
| F13B9.4  | F13B9.4  |
| F13B9.5  | ksr-1    |
| F13B9.7  | F13B9.7  |
| F13E6.2  | F13E6.2  |
| F13E6.6  | tag-118  |
| F14B4.2  |          |
| F14H12.4 |          |
| F14H3.12 | F14H3.12 |
| F15A2.6  | sad-1    |
| F16B12.5 | F16B12.5 |
| F16B12.7 | F16B12.7 |

|          |          |
|----------|----------|
| F17E5.1  | lin-2    |
| F18F11.4 | F18F11.4 |
| F18F11.5 |          |
| F18H3.5  | cdk-4    |
| F18H3.5  | cdk-4    |
| F19C6.1  | grk-1    |
| F19H6.1  | F19H6.1  |
| F20B6.8  | hpk-1    |
| F20D6.5  | F20D6.5  |
| F20H11.1 | F20H11.1 |
| F21D5.5  | F21D5.5  |
| F21F3.2  | F21F3.2  |
| F21H7.9  | gcy-20   |
| F22B3.8  |          |
| F22D6.1  | kin-14   |
| F22D6.5  | prp-4    |
| F22E5.3  | gcy-21   |
| F22F1.2  |          |
| F22F7.5  | ckb-4    |
| F22H10.1 | F22H10.1 |
| F22H10.5 | F22H10.5 |
| F23C8.7  | F23C8.7  |
| F23C8.8  | F23C8.8  |
| F23H12.6 | gcy-13   |
| F25B3.3  |          |
| F25F2.1  | F25F2.1  |
| F25H2.2  | F25H2.2  |
| F25H2.5  | F25H2.5  |
| F25H5.3  |          |
| F26A1.3  |          |
| F26A1.4  | F26A1.4  |
| F26D11.1 | F26D11.1 |
| F26D11.4 | F26D11.4 |
| F26E4.5  | F26E4.5  |
| F27E5.3  | F27E5.3  |
| F28B12.3 | vrk-1    |
| F28C10.3 |          |
| F28H6.1  | akt-2    |
| F28H6.1A | akt-2    |
| F29C4.1  |          |
| F30A10.3 | F30A10.3 |
| F31E3.2  |          |
| F32A11.5 |          |
| F32B6.10 |          |
| F32B6.4  |          |
| F32D8.1  | F32D8.1  |
| F32D8.13 |          |
| F32E10.5 | F32E10.5 |
| F33D11.7 | F33D11.8 |
| F33E2.2  | dlk-1    |
| F33E2.2A | dlk-1    |
| F35C11.3 | F35C11.3 |
| F35C8.1  |          |
| F35C8.2  | F35C8.2  |
| F35C8.3  | jkk-1    |
| F35G12.3 | sel-5    |
| F35H12.4 | F35H12.4 |
| F35H8.7  | wee-1.1  |

|           |          |
|-----------|----------|
| F36H12.8  | F36H12.8 |
| F36H12.9  | F36H12.9 |
| F37E3.3   | F37E3.3  |
| F38B2.4   | F38B2.4  |
| F38E1.3   | F38E1.3  |
| F38E11.6  |          |
| F38E9.5   | F38E9.5  |
| F39B1.1   | F39B1.1  |
| F39F10.2  | F39F10.2 |
| F39F10.3  | F39F10.3 |
| F39H11.3  | cdk-8    |
| F39H12.3  |          |
| F40A3.5   |          |
| F40F8.1   | F40F8.1  |
| F40G9.13  | F40G9.13 |
| F41G3.5   |          |
| F42A10.4  | efk-1    |
| F42A10.4A | efk-1    |
| F42A9.1   |          |
| F42G10.2  | mkk-4    |
| F42G2.3   | F42G2.3  |
| F42G8.3   | pmk-2    |
| F42G8.4   | pmk-3    |
| F42G8.9   | F42G8.9  |
| F43C1.2   | mpk-1    |
| F43C1.5   |          |
| F44D12.1  |          |
| F44D12.11 |          |
| F44G3.2   | F44G3.2  |
| F45G2.7   | F45G2.7  |
| F45H7.4   | prk-2    |
| F46C3.1   | pek-1    |
| F46F2.2   | kin-20   |
| F46F5.2   | F46F5.2  |
| F46F6.2   | F46F6.2  |
| F46G11.3  | tag-257  |
| F46H5.3   |          |
| F46H6.2   | dgk-2    |
| F46H6.3   | F46H6.3  |
| F47B10.5  | F47B10.5 |
| F47F2.1   |          |
| F48G7.10  | F48G7.10 |
| F48G7.9   | F48G7.9  |
| F49B2.5   | src-2    |
| F49C5.4   | F49C5.4  |
| F49E11.1  | mbk-2    |
| F52B5.2   | F52B5.2  |
| F52C9.3   | F52C9.3  |
| F52E1.4   | gcy-7    |
| F52F12.3  | mom-4    |
| F53A3.1   | F53A3.1  |
| F53B6.7   | F53B6.7  |
| F53C3.1   | F53C3.1  |
| F53F4.6   | F53F4.6  |
| F53G12.6  | spe-8    |
| F53G2.7   | mnat-1   |
| F54C1.6   | F54C1.6  |
| F54F7.5   | mes-1    |

|                 |              |
|-----------------|--------------|
| F54G8.2         |              |
| F54H5.2         | F54H5.2      |
| F55A12.3        | ppk-1        |
| F55A3.6         | F55A3.6      |
| F55A8.2         |              |
| F55B11.5        |              |
| F55C5.7         |              |
| F55F3.1         | F55F3.1      |
| F55F8.3         | F55F8.4      |
| F55G1.8         | plk-3        |
| F56B3.1         | col-103      |
| F56H11.6        | F56H11.6     |
| F57B1.7         | F57B1.7      |
| F57B9.8         |              |
| F57C9.1         |              |
| F57F5.5         | pkc-1        |
| F58A3.2         |              |
| F58H12.1        | kin-29       |
| F59A3.8         | F59A3.8      |
| F59A6.1         | nsy-1        |
| F59A6.4         | F59A6.4      |
| F59A6.5         |              |
| F59E12.2        | zyg-1        |
| F59E12.3        | F59E12.3     |
| F59F3.1         | ver-3        |
| F59F3.5         | ver-4        |
| F59F5.3         |              |
| H01G02.2        | H01G02.2     |
| H03E18.2        | H03E18.2     |
| H04M03.1        | H04M03.1     |
| H05L14.1        | H05L14.1     |
| H12I13.1        |              |
| H25P06.1        | H25P06.1     |
| H25P06.2a       |              |
| H25P06.2B       | cdk-9        |
| H28G03.6        | mtm-5        |
| H37N21.1        | H37N21.1     |
| H39E23.1        | par-1        |
| H42K12.1        | pdk-1        |
| K01A6.2         |              |
| K02B2.1         | K02B2.1      |
| K02E10.7        | K02E10.7     |
| K03E5.3         | K03E5.3      |
| K04C1.5         |              |
| K04C2.3         |              |
| K04G7.4         |              |
| K06A1.6         | K06A1.6      |
| K06H7.1         |              |
| K06H7.8         | K06H7.8      |
| K07A9.2         | cmk-1        |
| K07A9.2         | cmk-1        |
| <u>K07C11.2</u> | <u>air-1</u> |
| K07F5.4         | kin-24       |
| K08A8.1         | mek-1        |
| K08B12.5        | tag-59       |
| K08E3.6         | cyk-4        |
| K08F8.1         | K08F8.1      |
| K08H2.5         |              |

|                |              |
|----------------|--------------|
| K09A9.1        | K09A9.1      |
| K09B11.1       | pik-1        |
| K09B11.5       |              |
| K09C6.1        | K09C6.1      |
| K09C6.7        | K09C6.7      |
| K09C6.8        | K09C6.8      |
| K09E4.1        | K09E4.1      |
| K09H11.1       | K09H11.1     |
| K10D3.5        | K10D3.5      |
| K11C4.1        | K11C4.1      |
| K11D12.10A     | mlk-1        |
| K11E8.1        |              |
| K11H12.9       | K11H12.9     |
| K11H12.9       | K11H12.9     |
| K12B6.8        | K12B6.8      |
| K12C11.4       | tag-119      |
| K12D12.4       |              |
| M01B12.5       | M01B12.5     |
| M01B2.1        | kin-30       |
| M01D7.4        | M01D7.4      |
| M03A1.1        |              |
| M03C11.1       | M03C11.1     |
| M04C9.5        | M04C9.5      |
| M04F3.3        | M04F3.3      |
| M05D6.1        | M05D6.1      |
| M176.6         | kin-15       |
| M176.9         | M176.9       |
| M7.7           |              |
| M79.1          | abl-1        |
| PAR2.3         | aak-1        |
| <u>R01E6.1</u> | <u>odr-1</u> |
| R02C2.1        | R02C2.1      |
| R02C2.2        | R02C2.2      |
| R02E12.5       | R02E12.5     |
| R03D7.5        | R03D7.5      |
| R03G5.2        | sek-1        |
| R04A9.5        |              |
| R04A9.7        |              |
| R05G6.5        | R05G6.5      |
| R05H5.4        |              |
| R06A10.4       | R06A10.4     |
| R06C7.8        | bub-1        |
| R07A4.4        |              |
| R07E4.6A       | kin-2        |
| R07H5.8        | R07H5.8      |
| R08D7.7        | R08D7.7      |
| R09D1.12       | R09D1.12     |
| R09D1.13       | R09D1.13     |
| R107.4         | R107.4       |
| R10D12.10      | R10D12.10    |
| R10H10.6       | R10H10.6     |
| R10H10.7       | R10H10.7     |
| R11A5.4        |              |
| R11E3.1        | R11E3.1      |
| R11F4.1        | R11F4.1      |
| R11G1.4        |              |
| R11G1.6        |              |
| R12G8.1        | R12G8.1      |



|          |          |
|----------|----------|
| R134.1   | gcy-3    |
| R134.2   | gcy-2    |
| R13F6.6  | zak-1    |
| R13F6.7  | R13F6.7  |
| R13H9.5  | R13H9.5  |
| R13H9.6  | R13H9.6  |
| R151.2   |          |
| R151.4   | R151.4   |
| R166.5   |          |
| R53.2    | R53.2    |
| R53.7    |          |
| R90.1    | R90.1    |
| T01A4.1  |          |
| T01C1.1  | T01C1.1  |
| T01C8.1  |          |
| T01G5.1  | T01G5.1  |
| T01G9.4  | npp-2    |
| T01G9.6  | kin-10   |
| T01H10.4 | T01H10.4 |
| T01H8.1  | rskn-1   |
| T02G6.4  | T02G6.4  |
| T03D8.5  | gcy-22   |
| T03F1.3  | T03F1.3  |
| T03F1.6  |          |
| T03F1.8  | T03F1.8  |
| T04B2.2  | frk-1    |
| T04C10.1 | mbk-1    |
| T04C9.2  | T04C9.2  |
| T04D3.4  | gcy-35   |
| T05A6.1  | cki-1    |
| T05A6.2B | cki-2    |
| T05A7.6  | T05A7.6  |
| T05C12.1 | T05C12.1 |
| T05E8.2  | hil-8    |
| T05G5.3  | cdk-1    |
| T05G5.3  | cdk-1    |
| T05G5.5  | T05G5.5  |
| T05H10.8 | T05H10.8 |
| T06C10.3 |          |
| T06C10.6 | kin-26   |
| T06E4.3  |          |
| T07A9.3  | kgb-1    |
| T07F12.4 | T07F12.4 |
| T08D2.7  | T08D2.7  |
| T08G5.2  | T08G5.2  |
| T09B4.5  | T09B9.5  |
| T09B4.6  | T09B4.6  |
| T09B4.7  |          |
| T09B9.5  |          |
| T10A3.1  |          |
| T10B11.2 | T10B11.2 |
| T10H9.2  | scd-2    |
| T11F8.4  |          |
| T11F9.14 | T11F9.14 |
| T13H10.1 | kin-5    |
| T14E8.1  |          |
| T14G10.1 | pps-1    |
| T15B12.2 |          |

|           |           |
|-----------|-----------|
| T17A3.1   | ver-1     |
| T17A3.8   | ver-2     |
| T17E9.1   | kin-18    |
| T19A5.2   |           |
| T19D12.5  | T19D12.5  |
| T20F10.1  | T20F10.1  |
| T20F7.3   | T20F7.3   |
| T20F7.6   | T20F7.6   |
| T20G5.5   | pxf-2     |
| T21C9.6   | T21C9.6   |
| T21G5.1   | T21G5.1   |
| T22B11.3  | T22B11.3  |
| T22H6.2   |           |
| T23F11.3  | T23F11.3  |
| T24C12.3  | T24C12.3  |
| T24D5.4   |           |
| T24F1.3   | T24F1.3   |
| T24H10.5  | T24H10.5  |
| T25B9.4   |           |
| T25B9.5   | T25B9.5   |
| T25E12.4  | T25E12.4  |
| T27A10.3A | ckc-1     |
| T27A3.7   | T27A3.7   |
| T27C10.5  | T27C10.5  |
| T27C10.6  | lrk-1     |
| T27E9.3   | cdk-5     |
| T28D9.5   | T28D9.5   |
| T28F2.5   | ccb-1     |
| VF11C1L.1 | ppk-3     |
| VZC374L.1 | VZC374L.1 |
| W01B6.2   |           |
| W01B6.5   |           |
| W02A2.4   |           |
| W02B12.12 | W02B12.12 |
| W02B3.2   | grk-2     |
| W02B8.2   | W02B8.2   |
| W02H3.2   | W02H3.2   |
| W02H5.8   |           |
| W02H5.a   |           |
| W02H5.n   |           |
| W03A5.1   | W03A5.1   |
| W03D2.7   | W03D2.7   |
| W03F11.2  | gcy-17    |
| W03F8.2   | W03F8.2   |
| W03G1.6   | W03G1.6   |
| W03G1.8   | W03G1.8   |
| W03G9.5   | W03G9.5   |
| W04B5.5   |           |
| W04G3.5   | W04G3.5   |
| W04G5.3   | W04G5.3   |
| W04G5.6   | kin-23    |
| W05G11.6  |           |
| W06B3.2   | sma-5     |
| W06F12.1  | W07A12.4  |
| W06F12.3  | W06F12.3  |
| W07A12.4  |           |
| W07G4.3   | W07G4.3   |
| W08D2.8   | kin-21    |

|               |            |
|---------------|------------|
| W09C3.1       | W09C3.2    |
| W09C5.5       | W09C5.5    |
| W10G6.2       | sgk-1      |
| Y105C5A.24    |            |
| Y105C5A.x     |            |
| Y106G6A.1     | Y106G6A.1  |
| Y106G6A.a     |            |
| Y106G6D.4     | Y106G6D.4  |
| Y106G6E.1     | Y106G6E.1  |
| Y106G6E.6     |            |
| Y110A7A.6     |            |
| Y111B2A.1     |            |
| Y111B2A.27    |            |
| Y111B2A.a     | Y111B2A.a  |
| Y116A8C.24    |            |
| Y116A8C.38    | Y116A8C.38 |
| Y119D3_445.c  |            |
| Y119D3_445.d  |            |
| Y17G7B.10     |            |
| Y18D10A.5     | gsk-3      |
| Y18D10A.5     | gsk-3      |
| Y18H1A.10     |            |
| Y22D7AR.6     |            |
| Y38E10A.h     | Y38E10A.h  |
| Y38H6C.20     | Y38H6C.20  |
| Y38H8A.3      |            |
| Y38H8A.4      | Y38H8A.4   |
| Y39E4B.6      | Y39E4B.6   |
| Y39G8B.5      |            |
| Y39G8B.e      |            |
| Y39G8C.2      | Y39G8C.2   |
| Y39H10A.7     |            |
| Y39H10A_224.a |            |
| Y39H10A_224.c |            |
| Y42A5A.4      | Y42A5A.4   |
| Y42G9A.4      |            |
| Y43C5A.5      | thk-1      |
| Y43C5B.2      | Y43C5B.2   |
| Y43D4A.6      |            |
| Y43D4A.g      |            |
| Y45F10A.4     | Y45F10A.4  |
| Y47D3A.15     |            |
| Y47D3A.R      |            |
| Y47G6A.13     |            |
| Y47G6A.5      |            |
| Y47G6A_245.h  |            |
| Y47G6A_246.a  |            |
| Y48B6A.10     | Y48B6A.10  |
| Y48B6A.13     |            |
| Y48G1BL.2     |            |
| Y48G1C_55.a   |            |
| Y49E10.22     | Y49E10.22  |
| Y4C6A.1       |            |
| Y4C6A.a       |            |
| Y4C6A.b       |            |
| Y4C6A.k       |            |
| Y51B9A.9      | Y51B9A.9   |
| Y51B9A.9      | Y51B9A.9   |

|               |          |
|---------------|----------|
| Y52D3.1       | Y52D3.1  |
| Y52D5A.2      |          |
| Y53C12A.1     | wee1.3   |
| Y54E10B_152.c |          |
| Y54E10BL.4    | mek-2    |
| Y55B1AR.2     |          |
| Y55D5A.5      |          |
| Y57A10A.20    |          |
| Y57G11C.24    |          |
| Y59A8A.c      | Y59A8A.c |
| Y59A8B.23     |          |
| Y59A8B.a      | Y59A8B.a |
| Y65B4A.9      |          |
| Y65B4A_185.a  |          |
| Y65B4A_185.c  |          |
| Y67D8A.1      |          |
| Y67D8A.2      |          |
| Y68A4B.3      | Y68A4B.3 |
| Y69E1A.3      | Y69E1A.3 |
| Y71F9A_281.a  |          |
| Y71F9B_297.b  |          |
| Y71G12B.27    |          |
| Y71H10A.1     |          |
| Y73B6A.1      |          |
| Y73B6A.2      |          |
| Y73B6A.c      |          |
| Y73B6A.f      |          |
| Y75B8A.36     |          |
| Y77E11A.2     |          |
| Y79H2A.11     | zyg-8    |
| ZC123.4       | ZC123.4  |
| ZC239.7       | gcy-15   |
| ZC373.3       | ZC373.3  |
| ZC373.4       | ZC373.4  |
| ZC404.4       | mig-15   |
| ZC404.9       | gck-2    |
| ZC412.2       | gcy-14   |
| ZC416.4       | kgb-2    |
| ZC434.8       | ZC434.8  |
| ZC449.3       | ZC581.9  |
| ZC504.3       |          |
| ZC504.4C      | mig-15   |
| ZC581.1       | ZC581.1  |
| ZC581.2       | ZC581.2  |
| ZC581.7       | ZC581.7  |
| ZC581.9       |          |
| ZC8.6         | ZC8.6    |
| ZK1055.6      |          |
| ZK1067.1      | let-23   |
| ZK1290.1      | ZK1290.1 |
| ZK1307.8      | ZK1307.8 |
| ZK177.2       | ZK177.2  |
| ZK354.2       |          |
| ZK354.6       |          |
| ZK370.5       | ZK370.5  |
| ZK455.2       | gcy-9    |
| ZK507.1       |          |
| ZK507.2       |          |

|         |         |
|---------|---------|
| ZK507.3 | ZK507.3 |
| ZK524.2 |         |
| ZK524.4 | ZK524.4 |
| ZK593.1 | ZK593.1 |
| ZK593.9 | ZK593.9 |
| ZK596.2 | ZK596.2 |
| ZK617.1 | unc-22  |
| ZK622.1 |         |
| ZK632.3 | ZK632.3 |
| ZK637.9 |         |
| ZK666.8 |         |
| ZK669.1 | tag-341 |
| ZK673.2 | ZK673.2 |
| ZK795.1 | ZK795.1 |
| ZK896.8 | gcy-18  |
| ZK909.2 | kin-1   |
| ZK909.2 | kin-1   |
| ZK930.1 | ZK930.1 |
| ZK938.5 | old-2   |
| ZK970.5 | gcy-4   |
| ZK970.5 | gcy-4   |
| ZK970.6 | gcy-5   |
| ZK970.7 | ZK970.7 |
